# Supplementary material for: Gem-difluoromethylated and trifluoromethylated derivatives of DMDP-related iminosugars: synthesis and glycosidase inhibition
Source: Royal Society of Chemistry journal article supplement (doi:10.1039/c5ob02474a), 2016-01-01

# Gem-difluoromethylated and Trifluoromethylated Derivatives of DMDP-related Iminosugars: Synthesis and Glycosidase Inhibition

Yi-Xian Li,<sup>a</sup> Kyoko Kinami,<sup>b</sup> Yuki Hirokami,<sup>b</sup> Atsushi Kato,<sup>\*b</sup> Jia-Kun Su,<sup>a</sup> Yue-Mei Jia,<sup>a</sup> George W. J. Fleet<sup>c,d</sup> and Chu-Yi Yu<sup>\*a,d</sup>

<sup>a</sup> Beijing National Laboratory for Molecular Science (BNLMS), CAS Key Laboratory of Molecular Recognition and Function, Institute of Chemistry, Chinese Academy of Sciences, Beijing 100190, China. Email: yucy@iccas.ac.cn

<sup>b</sup> Department of Hospital Pharmacy, University of Toyama, 2630 Sugitani, Toyama 930-0194, Japan. E-mail: kato@med.u-toyama.ac.jp

<sup>c</sup> Chemistry Research Laboratory, Department of Chemistry, University of Oxford, Mansfield Road, Oxford, OX1 3TA, UK.

<sup>d</sup> National Engineering Research Center for Carbohydrate Synthesis, Jiangxi Normal University, Nanchang 330022, PR China

## Supplementary Information

(NMR spectra and Infrared spectra)

### Compound 14:

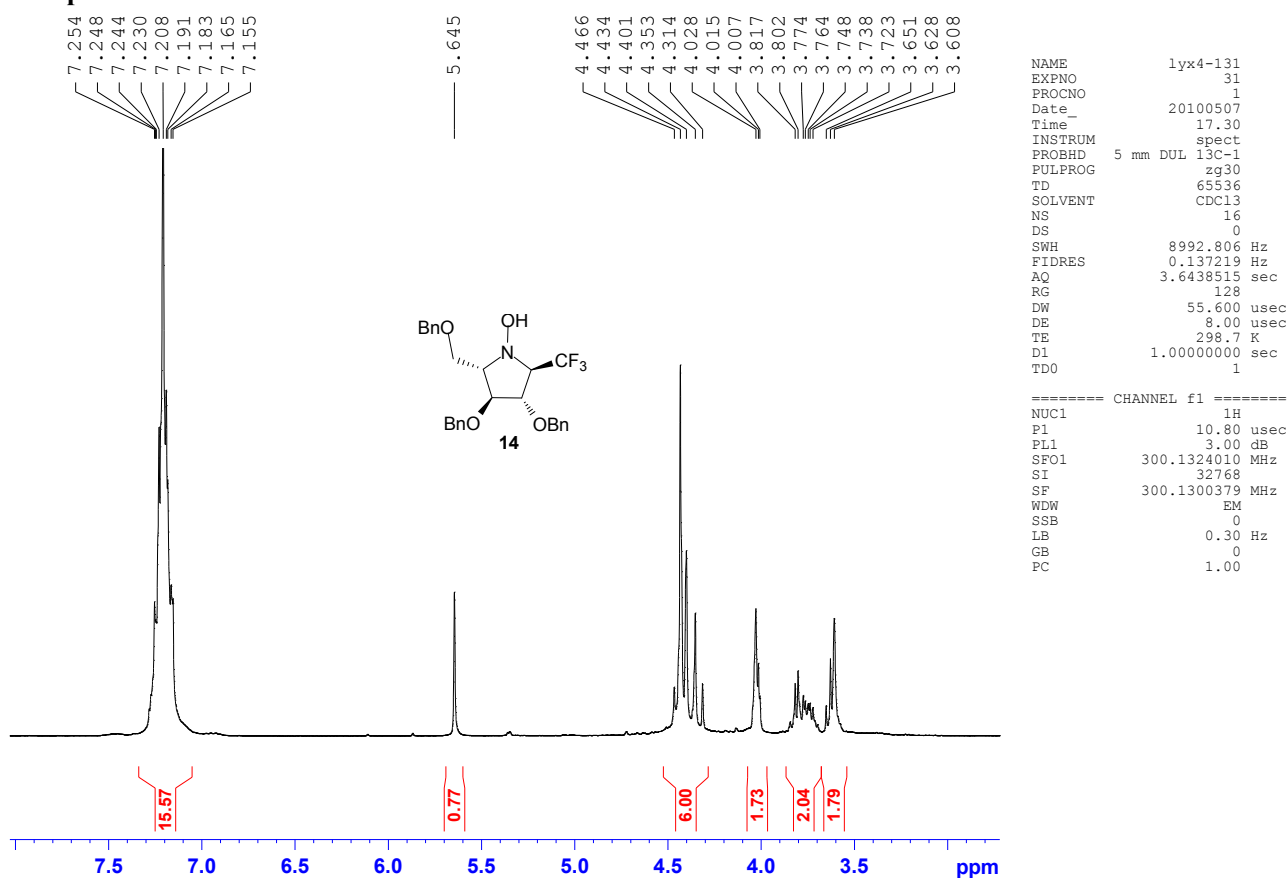

137.974  
137.555  
137.214  
128.449  
128.430  
128.400  
128.021  
127.948  
127.881  
127.801  
127.706  
127.016  
82.363  
82.186  
77.473  
77.049  
76.626  
73.349  
72.636  
72.260  
72.067  
71.901  
68.840  
65.614  
130.695  
123.323  
73.031

NAME lyx4-131  
EXPNO 30  
PROCNO 1  
Date\_ 20100509  
Time 16.50  
INSTRUM spect  
PROBHD 5 mm DUL 13C-1  
PULPROG zgpg30  
TD 65536  
SOLVENT CDCl3  
NS 231  
DS 4  
SWH 17985.611 Hz  
FIDRES 0.274439 Hz  
AQ 1.8219508 sec  
RG 4597.6  
DW 27.800 usec  
DE 8.00 usec  
TE 298.7 K  
D1 2.00000000 sec  
D11 0.03000000 sec  
TD0 1

===== CHANNEL f1 =====  
NUC1 13C  
P1 12.50 usec  
PL1 2.00 dB  
SFO1 75.4752953 MHz  
===== CHANNEL f2 =====  
CPDPRG2 waltz16  
NUC2 1H  
PCPD2 100.00 usec  
PL2 3.00 dB  
PL12 22.33 dB  
PL13 23.00 dB  
SFO2 300.1312005 MHz  
SI 32768  
SF 75.4677490 MHz  
WDW EM  
SSB 0  
LB 1.00 Hz  
GB 0  
PC 1.40

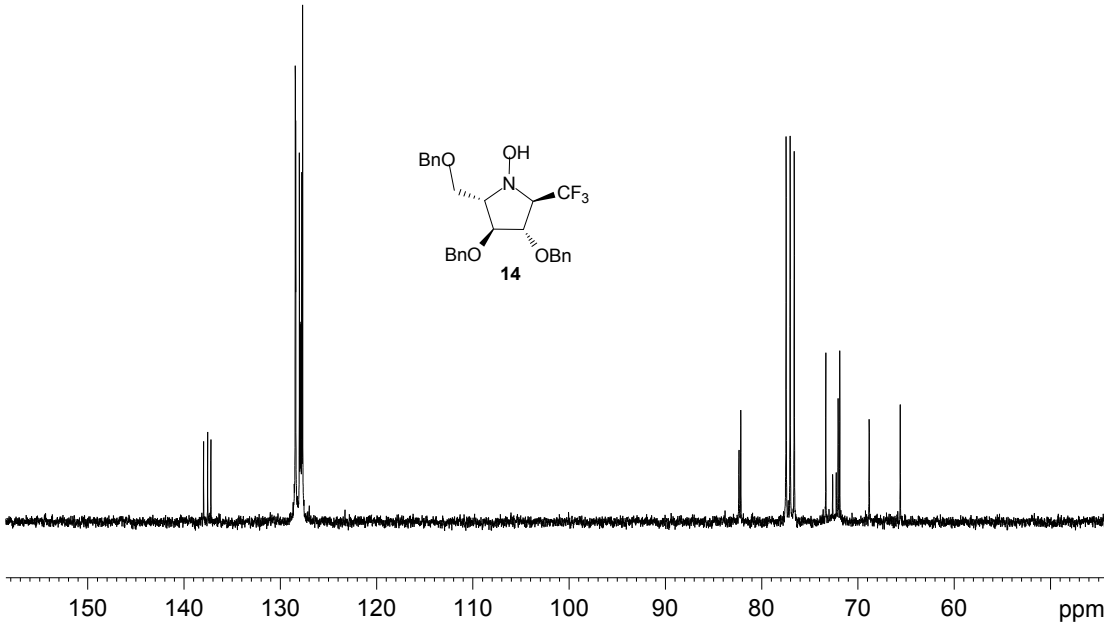

128.45  
128.43  
128.40  
128.02  
127.95  
127.88  
127.80  
127.71

82.36  
82.16  
73.35  
72.63  
72.26  
72.06  
71.90  
68.84  
65.61

NAME lyx4-131  
EXPNO 40  
PROCNO 1  
Date\_ 20100509  
Time 17.06  
INSTRUM spect  
PROBHD 5 mm DUL 13C-1  
PULPROG dept135  
TD 65536  
SOLVENT CDCl3  
NS 64  
DS 4  
SWH 17985.611 Hz  
FIDRES 0.274439 Hz  
AQ 1.8219508 sec  
RG 16384  
DW 27.800 usec  
DE 8.00 usec  
TE 299.1 K  
CNST2 145.0000000  
D1 2.00000000 sec  
D2 0.00344828 sec  
D12 0.00002000 sec  
TD0 1

===== CHANNEL f1 =====  
NUC1 13C  
P1 12.50 usec  
P2 25.00 usec  
PL1 2.00 dB  
SFO1 75.4752953 MHz

===== CHANNEL f2 =====  
CPDPRG2 waltz16  
NUC2 1H  
P3 10.60 usec  
P4 21.60 usec  
PCPD2 100.00 usec  
PL2 3.00 dB  
PL12 22.33 dB  
SFO2 300.1312005 MHz  
SI 32768  
SF 75.4677490 MHz  
WDW EM  
SSB 0  
LB 1.00 Hz  
GB 0  
PC 1.40

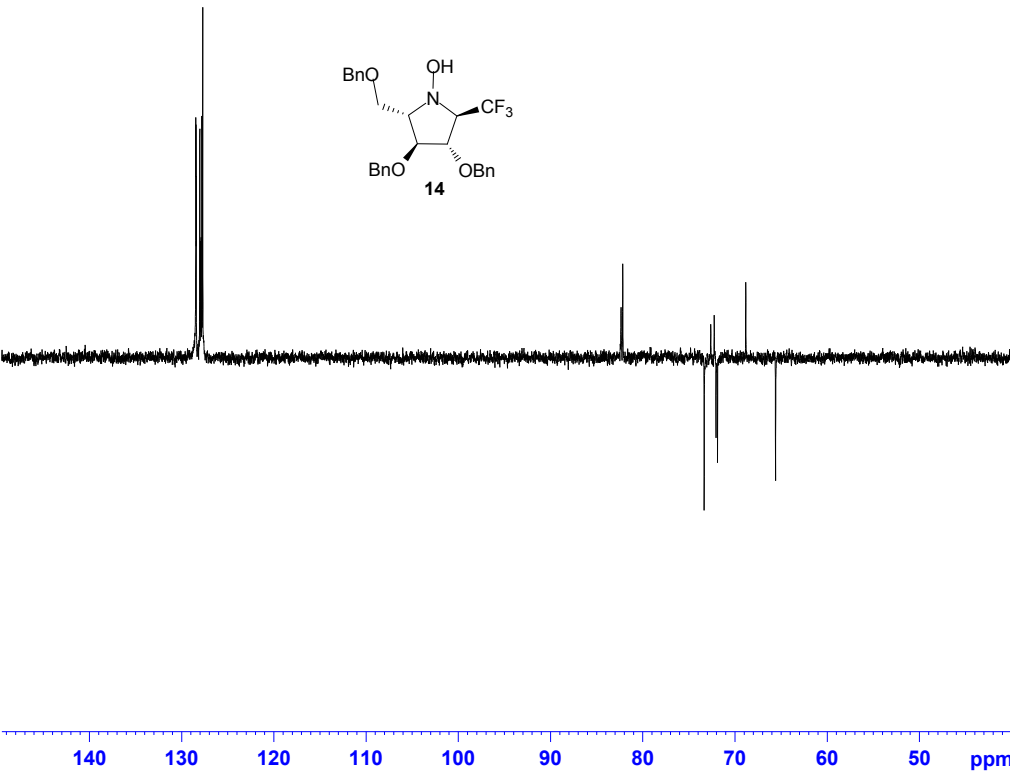

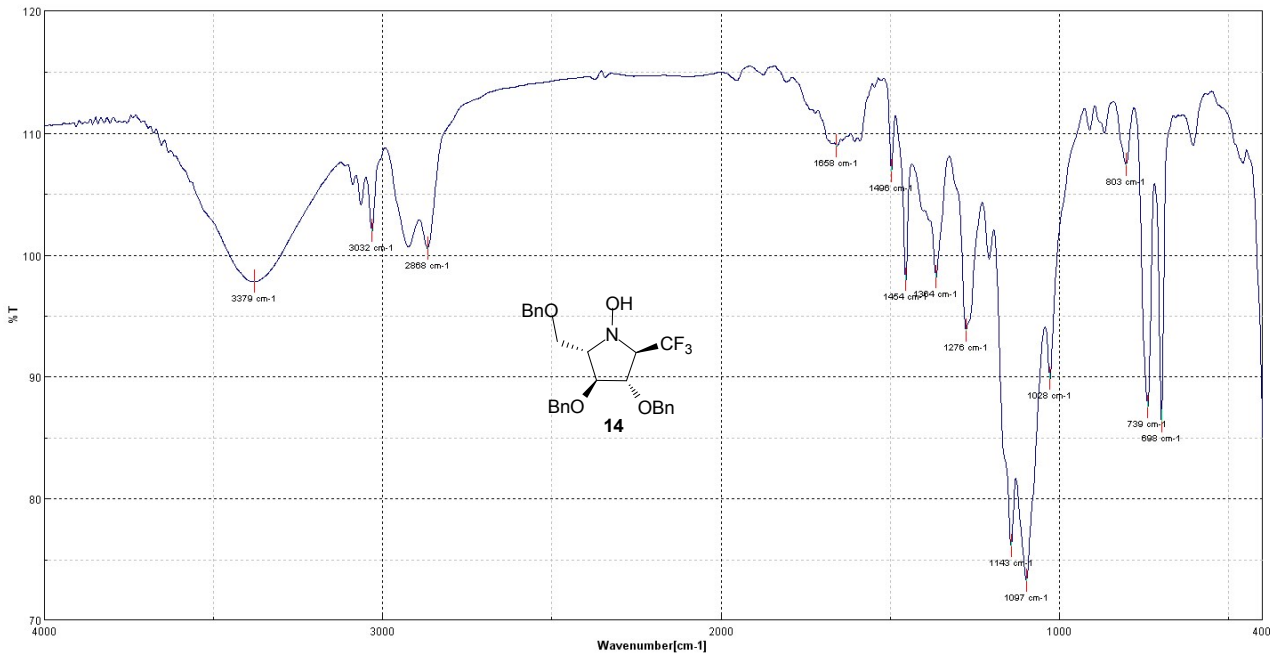

**Compound 15:**

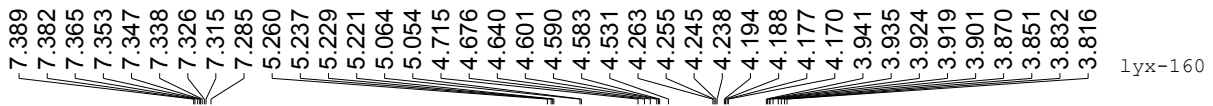

NAME lyx-2016  
 EXPNO 55  
 PROCNO 1

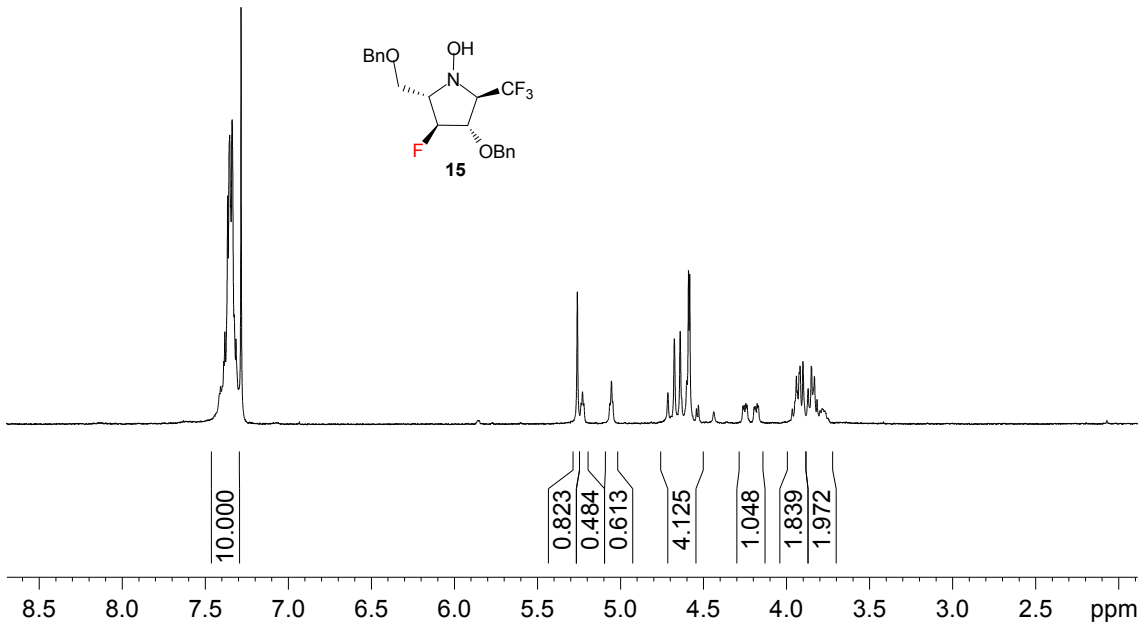

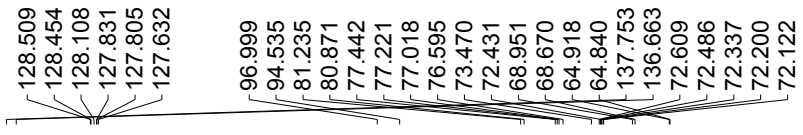

lyx-160-C13  
NAME lyx-2016  
EXPNO 56  
PROCNO 1

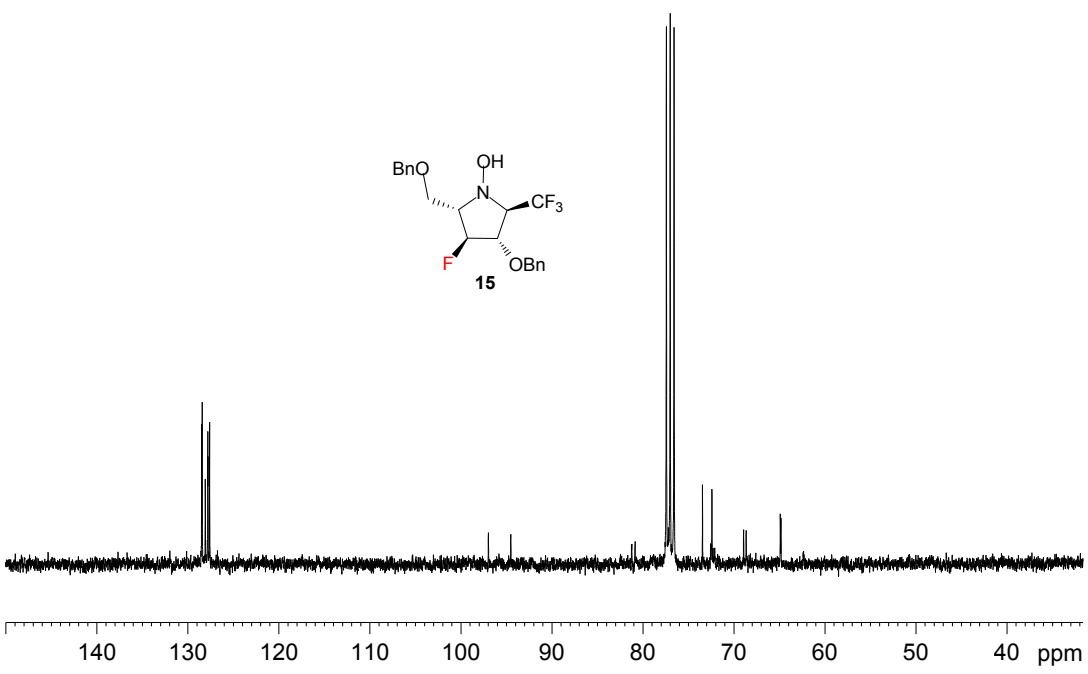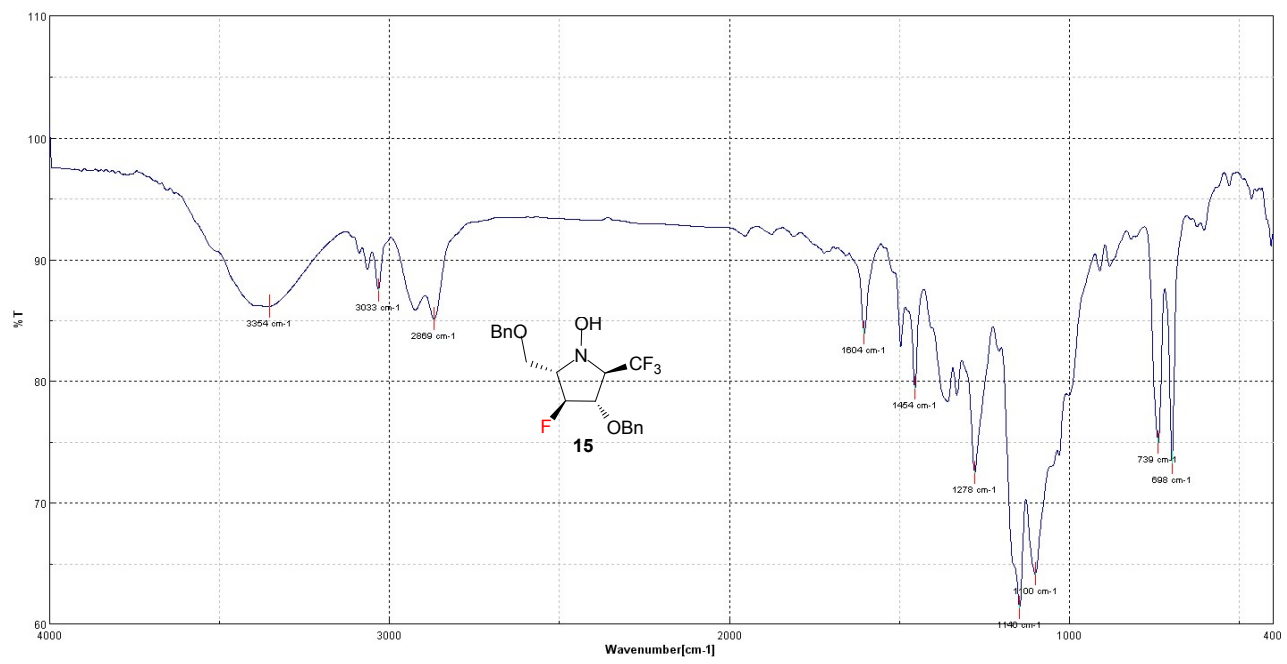

Compound 6:

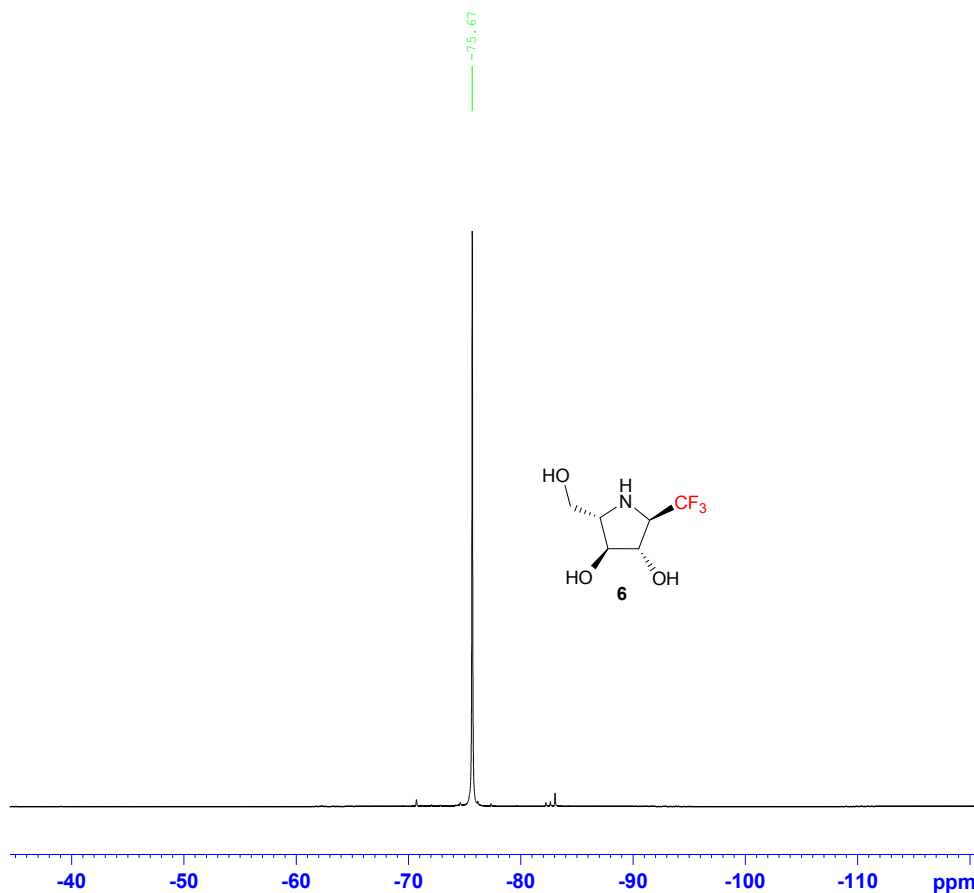

```

Current Data Parameters
NAME      lyx4-151
EXPNO    208
PROCNO   1

F2 - Acquisition Parameters
Date_    20100609
Time     11.54
INSTRUM  AV400
PROBHD   5 mm BBO BB-1H
PULPROG  zgfgln
TD       32768
SOLVENT  CDCl3
NS       16
DS       0
SWH      75187.969 Hz
FIDRES   2.294555 Hz
AQ       0.2179572 sec
RG       45
DW       6.650 usec
DE       6.00 usec
TE       673.2 K
D1       1.00000000 sec

===== CHANNEL f1 =====
NUC1     19F
P1       12.50 usec
PL1      0.00 dB
SFO1     376.4644691 MHz

F2 - Processing parameters
SI       65536
SF       376.4983540 MHz
WDW      EM
SSB      0
LB       20.00 Hz
GB       0
PC       0.10

1D NMR plot parameters
CX       24.00 cm
CY       8.00 cm
F1P      -51.980 ppm
F1       -19570.51 Hz
F2P      -109.410 ppm
F2       -41192.70 Hz
FPMCM    2.39290 ppm/cm
HZCM     900.92450 Hz/cm
    
```

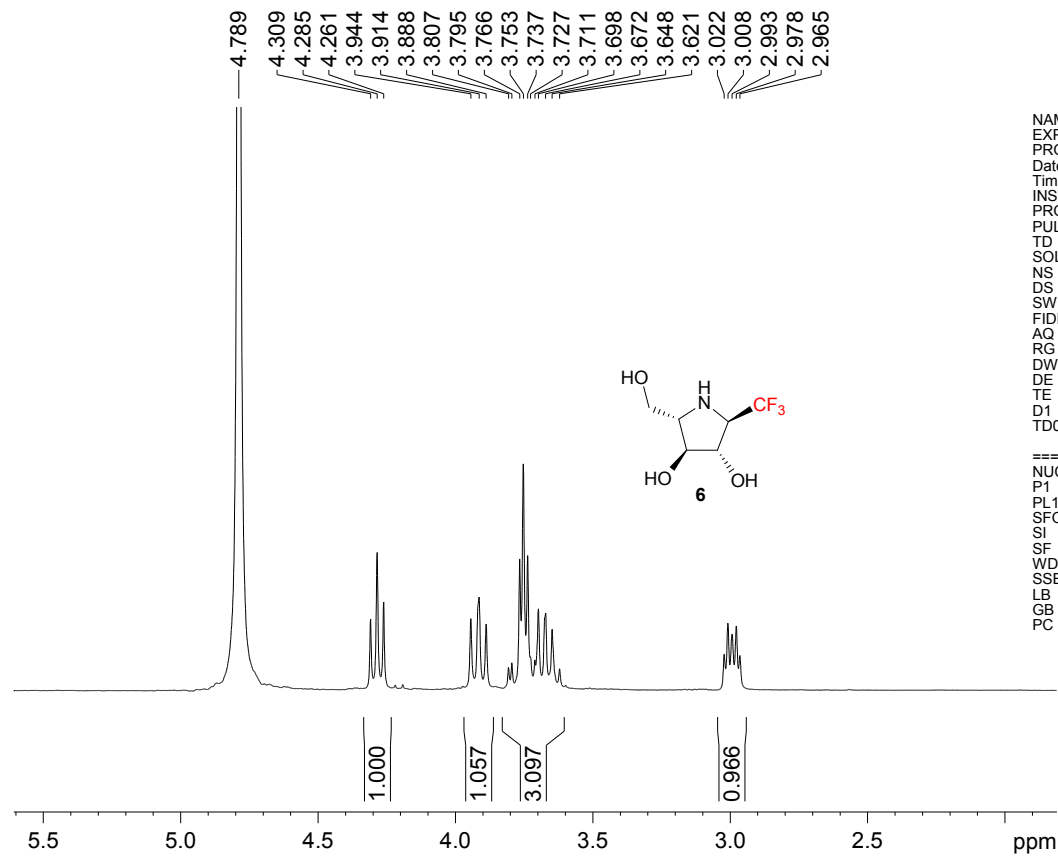

```

NAME      lyx4-151
EXPNO    10
PROCNO   1
Date_    20100519
Time     9.44
INSTRUM  spect
PROBHD   5 mm DUL 13C-1
PULPROG  zg30
TD       65536
SOLVENT  D2O
NS       6
DS       0
SWH      8992.806 Hz
FIDRES   0.137219 Hz
AQ       3.6438515 sec
RG       128
DW       55.600 usec
DE       8.00 usec
TE       299.9 K
D1       1.00000000 sec
TD0      1

===== CHANNEL f1 =====
NUC1     1H
P1       10.80 usec
PL1      3.00 dB
SFO1     300.1324010 MHz
SI       32768
SF       300.1299726 MHz
WDW      EM
SSB      0
LB       0.30 Hz
GB       0
PC       1.00
    
```

131.55  
127.85  
124.15  
120.45

76.59

61.81  
61.50  
61.42  
61.03  
60.64  
59.67

NAME lyx4-151  
EXPNO 12  
PROCNO 1  
Date\_ 20100519  
Time\_ 9.51  
INSTRUM spect  
PROBHD 5 mm DUL 13C-1  
PULPROG zgpg30  
TD 65536  
SOLVENT D2O  
NS 816  
DS 4  
SWH 17985.611 Hz  
FIDRES 0.274439 Hz  
AQ 1.8219508 sec  
RG 16384  
DW 27.800 usec  
DE 8.00 usec  
TE 300.1 K  
D1 2.00000000 sec  
D11 0.03000000 sec  
TD0 1

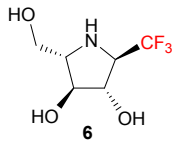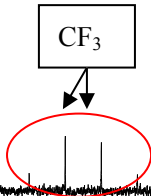

===== CHANNEL f1 =====  
NUC1 13C  
P1 12.50 usec  
PL1 2.00 dB  
SFO1 75.4752953 MHz  
===== CHANNEL f2 =====  
CPDPRG2 waltz16  
NUC2 1H  
PCPD2 100.00 usec  
PL2 3.00 dB  
PL12 22.33 dB  
PL13 23.00 dB  
SFO2 300.1312005 MHz  
SI 32768  
SF 75.4677490 MHz  
WDW EM  
SSB 0  
LB 1.00 Hz  
GB 0  
PC 1.40

140 130 120 110 100 90 80 70 60 ppm

76.57

61.79  
61.49  
61.40  
61.01  
60.62  
59.65

NAME lyx4-151  
EXPNO 21  
PROCNO 1  
Date\_ 20100526  
Time\_ 9.48  
INSTRUM spect  
PROBHD 5 mm DUL 13C-1  
PULPROG dept135  
TD 65536  
SOLVENT D2O  
NS 79  
DS 4  
SWH 17985.611 Hz  
FIDRES 0.274439 Hz  
AQ 1.8219508 sec  
RG 16384  
DW 27.800 usec  
DE 8.00 usec  
TE 300.4 K  
CNST2 145.0000000  
D1 2.00000000 sec  
D2 0.00344828 sec  
D12 0.00002000 sec  
TD0 1

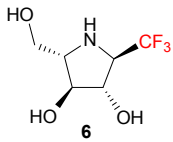

===== CHANNEL f1 =====  
NUC1 13C  
P1 12.50 usec  
P2 25.00 usec  
PL1 2.00 dB  
SFO1 75.4752953 MHz  
===== CHANNEL f2 =====  
CPDPRG2 waltz16  
NUC2 1H  
P3 10.80 usec  
P4 21.60 usec  
PCPD2 100.00 usec  
PL2 3.00 dB  
PL12 22.33 dB  
SFO2 300.1312005 MHz  
SI 32768  
SF 75.4677490 MHz  
WDW EM  
SSB 0  
LB 1.00 Hz  
GB 0  
PC 1.40

85 80 75 70 65 60 55 ppm

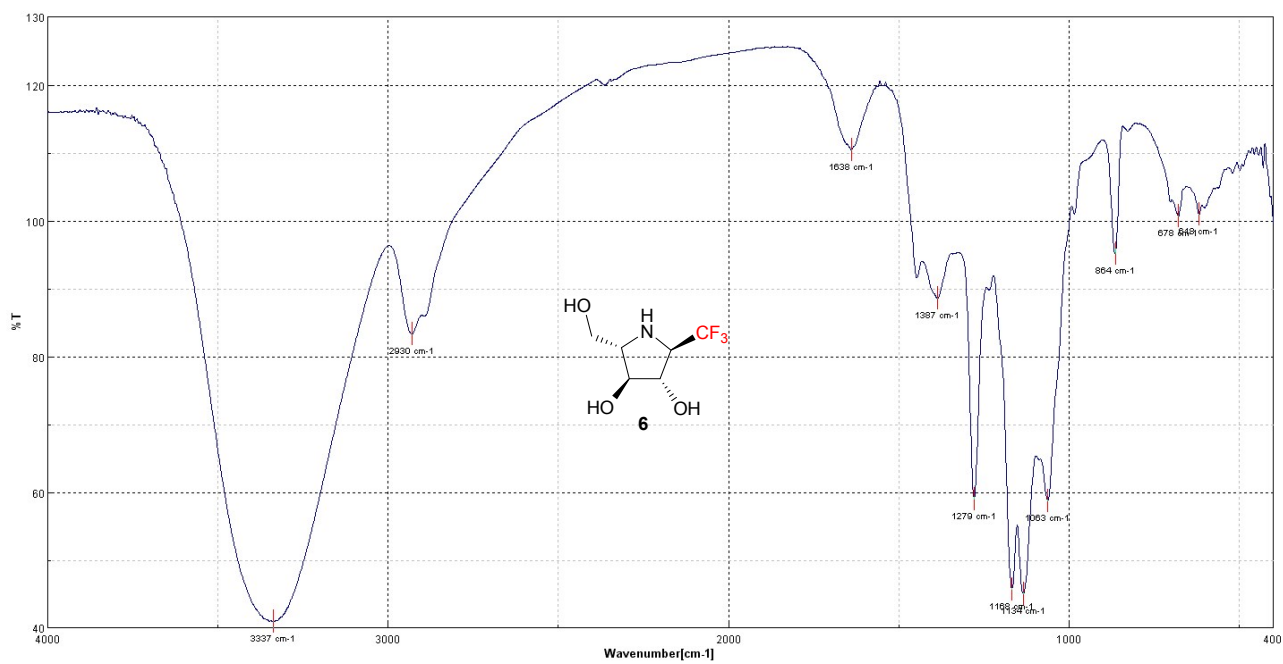

Compound 7:

— -75.535

|        |     |
|--------|-----|
| NAME   | 19F |
| EXPNO  | 207 |
| PROCNO | 1   |

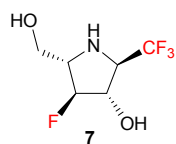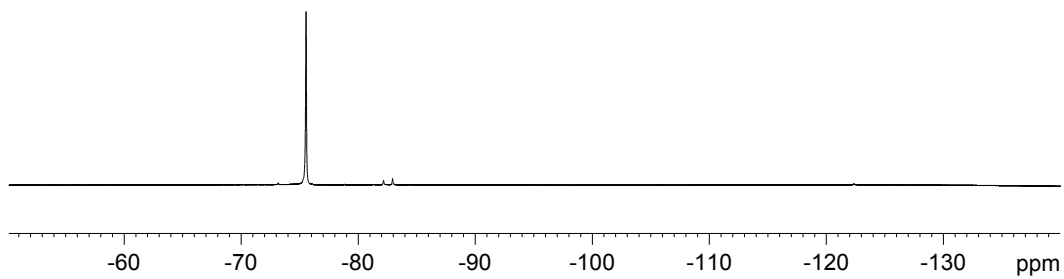

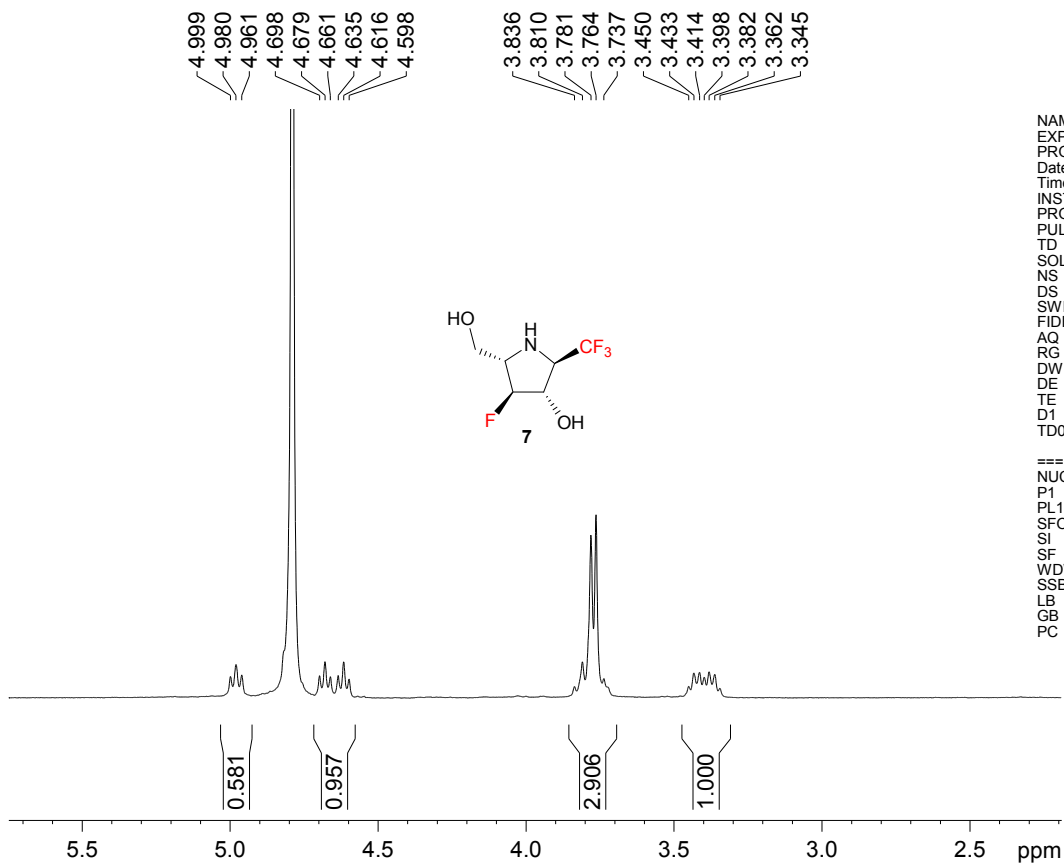

```

NAME lyx4-161
EXPNO 10
PROCNO 1
Date_ 20100607
Time 17.20
INSTRUM spect
PROBHD 5 mm DUL 13C-1
PULPROG zg30
TD 65536
SOLVENT D2O
NS 3
DS 0
SWH 892.806 Hz
FIDRES 0.137219 Hz
AQ 3.6438515 sec
RG 256
DW 55.600 usec
DE 8.00 usec
TE 300.6 K
D1 1.00000000 sec
TD0 1

```

```

===== CHANNEL f1 =====
NUC1 1H
P1 10.80 usec
PL1 3.00 dB
SFO1 300.1324010 MHz
SI 32768
SF 300.1299722 MHz
WDW EM
SSB 0
LB 0.30 Hz
GB 0
PC 1.00

```

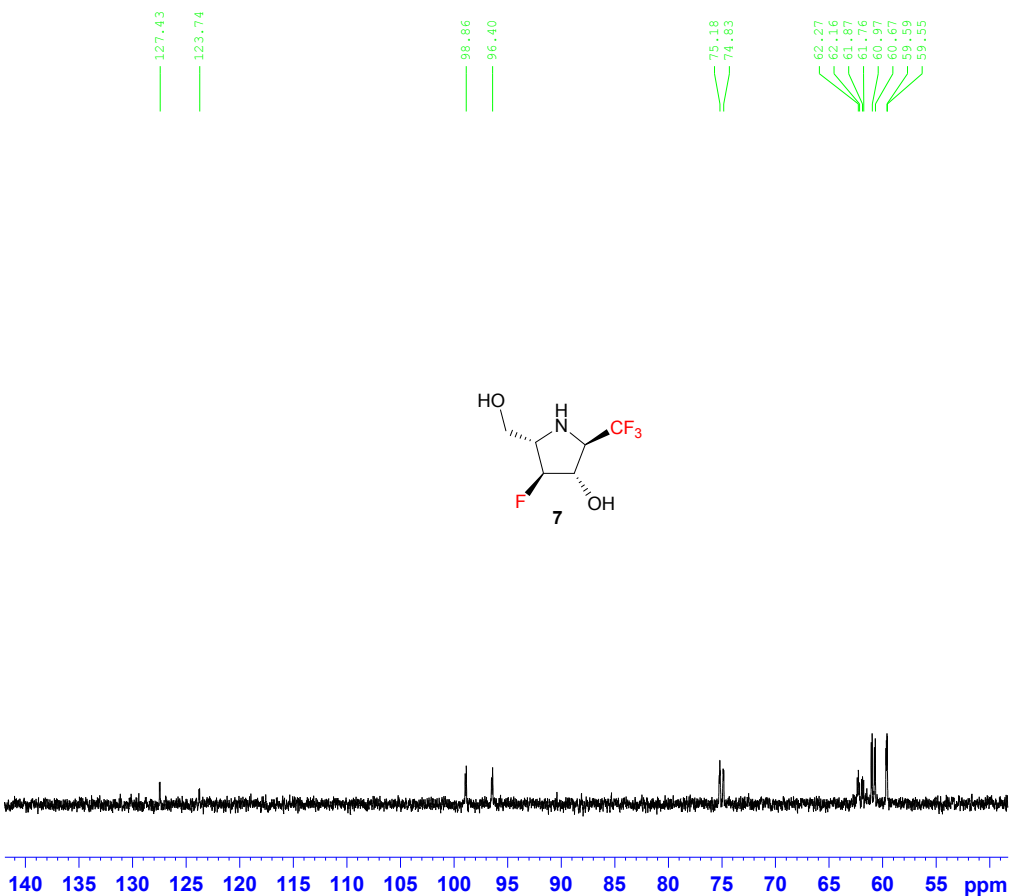

```

NAME lyx4-161
EXPNO 12
PROCNO 1
Date_ 20100607
Time 17.27
INSTRUM spect
PROBHD 5 mm DUL 13C-1
PULPROG zgpg30
TD 65536
SOLVENT D2O
NS 686
DS 4
SWH 17985.611 Hz
FIDRES 0.274439 Hz
AQ 1.8219508 sec
RG 18390.4
DW 27.800 usec
DE 8.00 usec
TE 300.9 K
D1 2.00000000 sec
D11 0.03000000 sec
TD0 1

```

```

===== CHANNEL f1 =====
NUC1 13C
P1 12.50 usec
PL1 2.00 dB
SFO1 75.4752953 MHz

```

```

===== CHANNEL f2 =====
CPDPRG2 waltz16
NUC2 1H
PCPD2 100.00 usec
PL2 3.00 dB
PL12 22.33 dB
PL13 23.00 dB
SFO2 300.1312005 MHz
SI 32768
SF 75.4677490 MHz
WDW EM
SSB 0
LB 1.00 Hz
GB 0
PC 1.40

```



96.85  
96.39

75.15  
74.84

62.96  
62.15  
61.86  
61.75  
60.86  
60.66  
59.58  
59.54

```
NAME lyx4-161
EXPNO 20
PROCNO 1
Date_ 20100609
Time 9.07
INSTRUM spect
PROBHD 5 mm DUL 13C-1
PULPROG dept135
TD 65536
SOLVENT D2O
NS 111
DS 4
SWH 17985.611 Hz
FIDRES 0.274439 Hz
AQ 1.8219508 sec
RG 16384
DW 27.800 usec
DE 8.00 usec
TE 299.9 K
CNST2 145.000000
D1 2.0000000 sec
D2 0.00344828 sec
D12 0.00002000 sec
TD0 1

===== CHANNEL f1 =====
NUC1 13C
P1 12.50 usec
P2 25.00 usec
PL1 2.00 dB
SFO1 75.4752953 MHz

===== CHANNEL f2 =====
CPDPRG2 waltz16
NUC2 1H
P3 10.80 usec
P4 21.60 usec
PCPD2 100.00 usec
PL2 3.00 dB
PL12 22.33 dB
SFO2 300.1312005 MHz
SI 32768
SF 75.4677490 MHz
WDW EM
SSB 0
LB 1.00 Hz
GB 0
PC 1.40
```

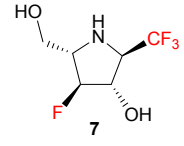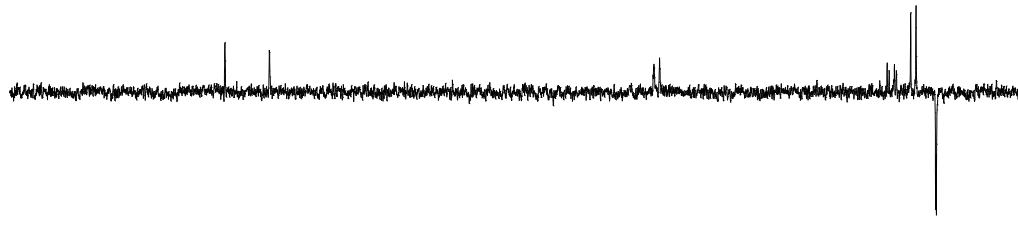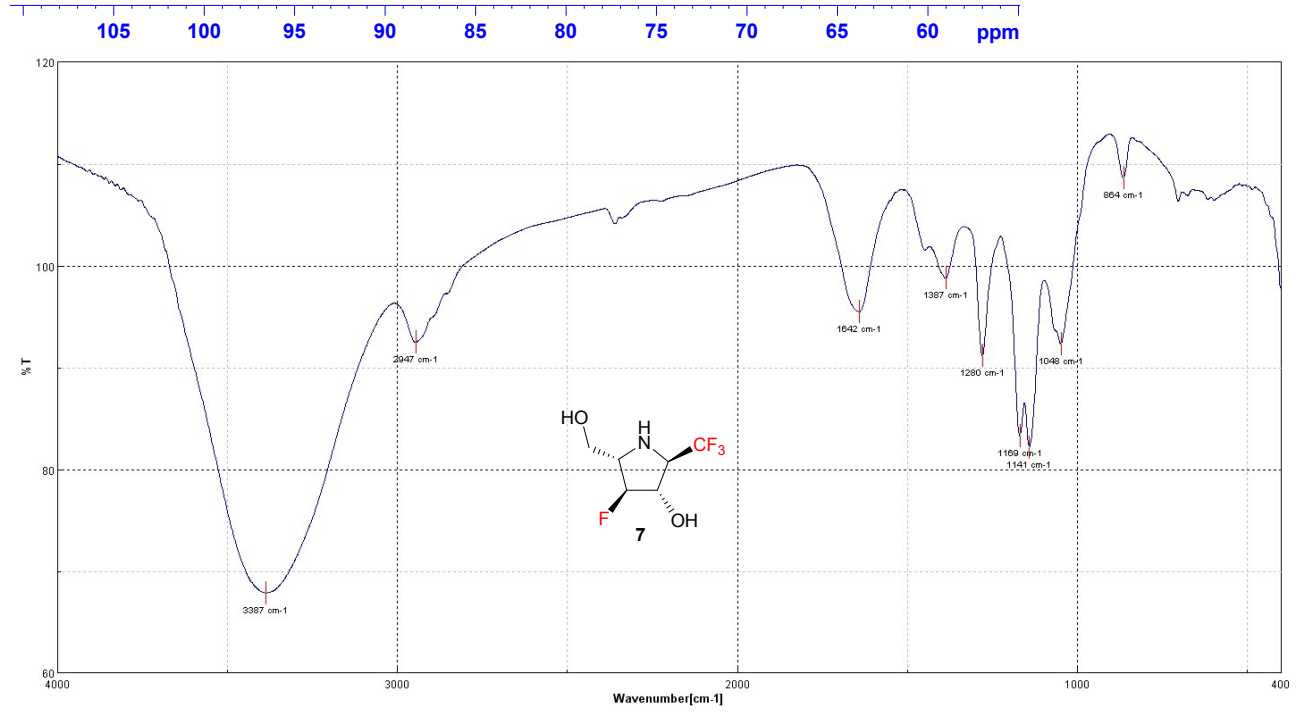

Compound 19:

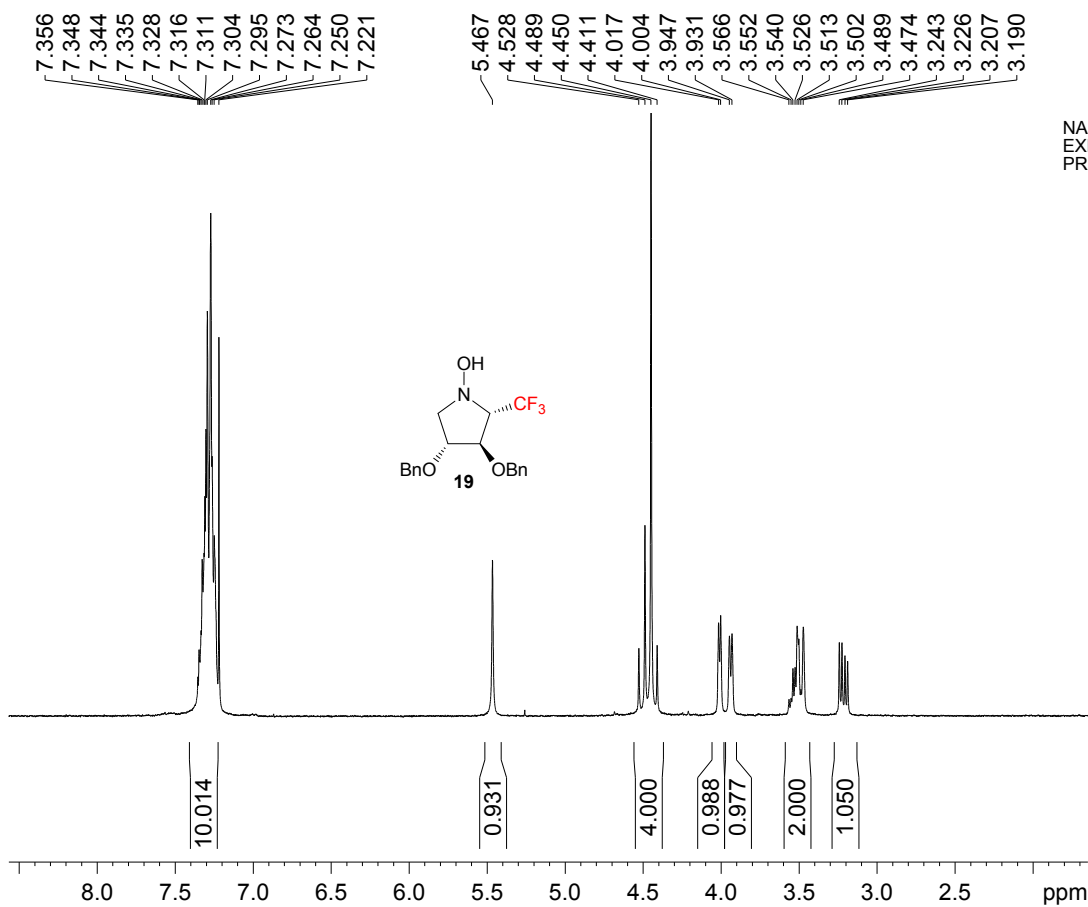

lyx-221

NAME lyx-2016  
EXPNO 35  
PROCNO 1

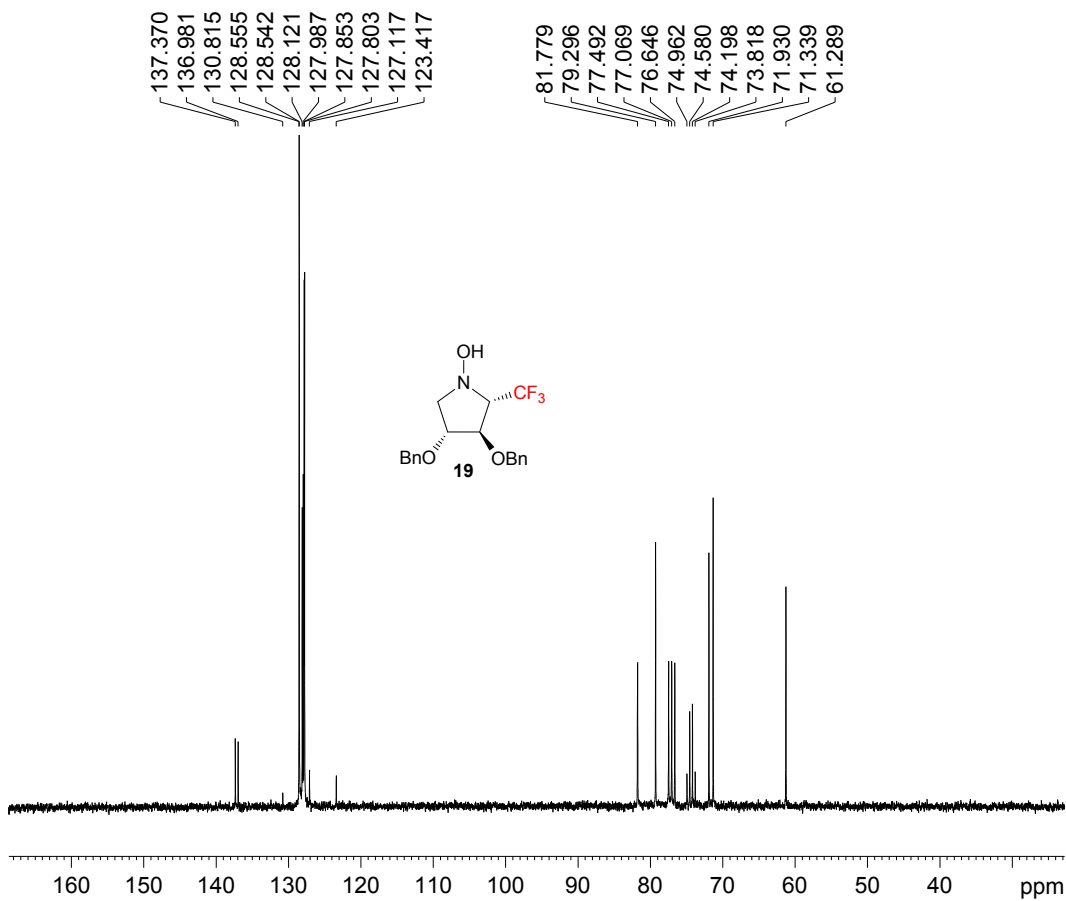

lyx-221-C13

NAME lyx-2016  
EXPNO 37  
PROCNO 1

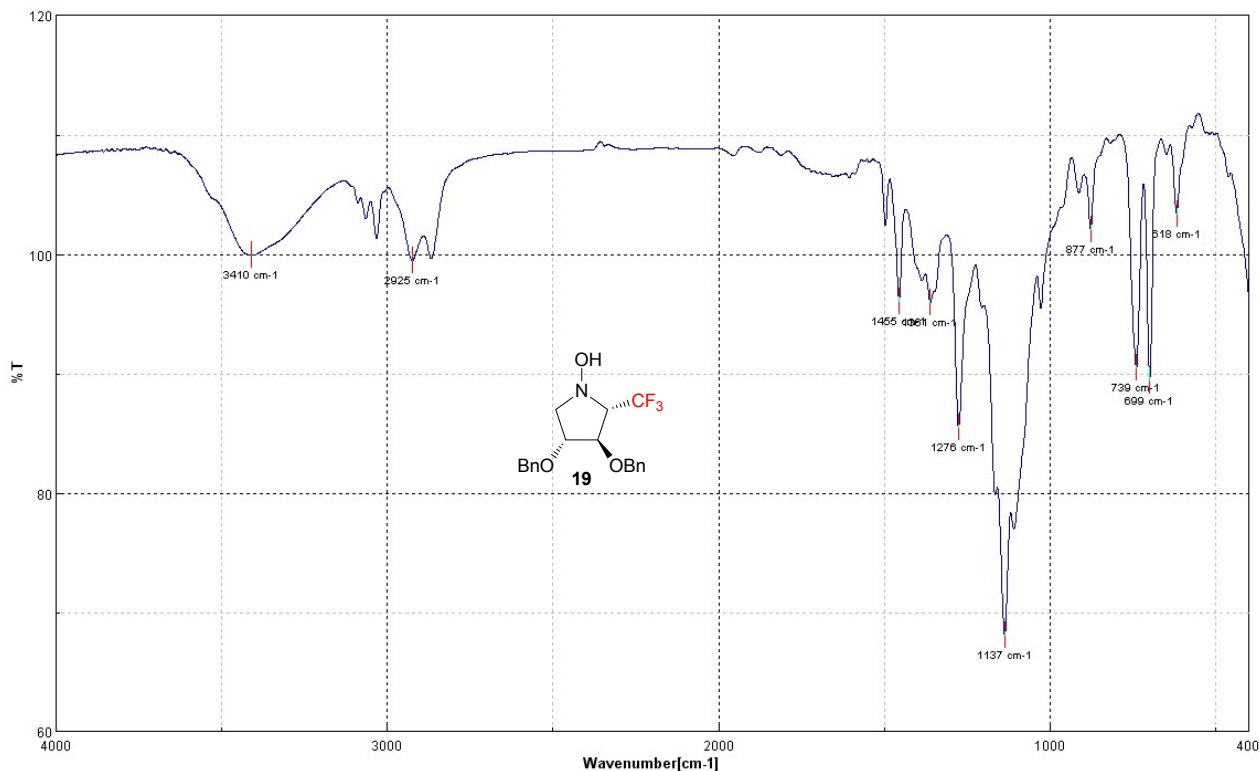

**Compound *ent*-19:**

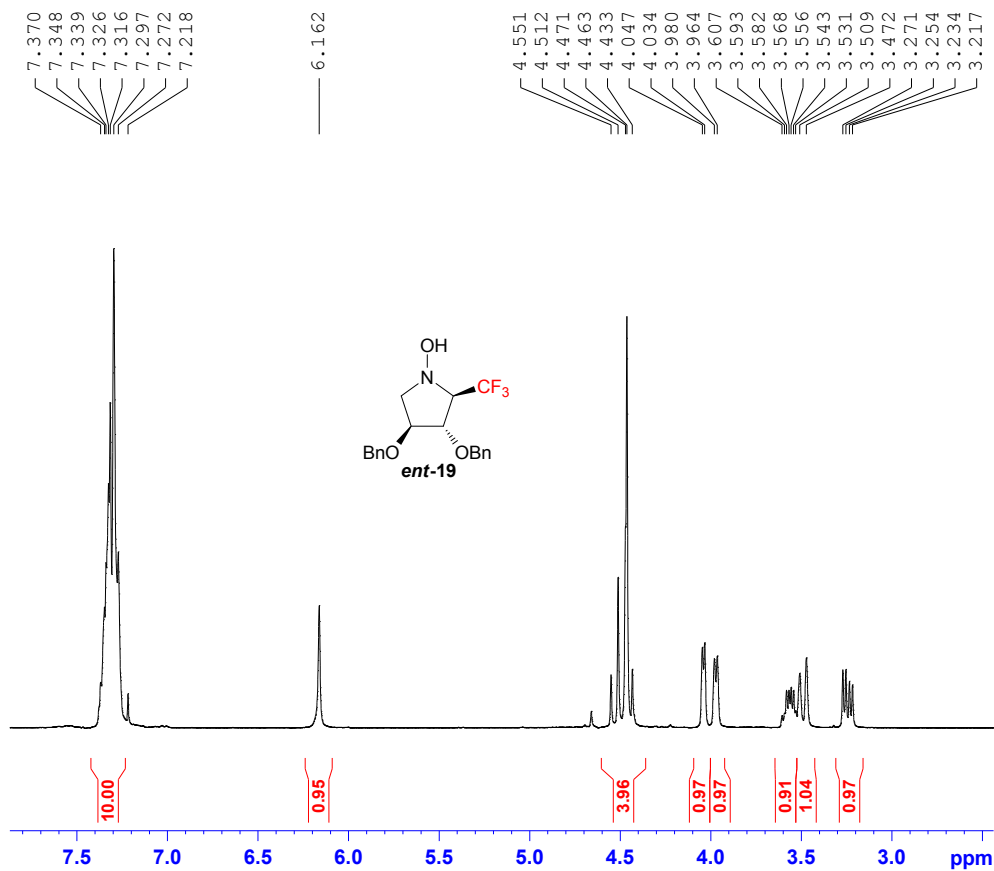

```

NAME lyx4-219a
EXPNO 10
PROCNO 1
Date_ 20101214
Time 9.07
INSTRUM spect
PROBHD 5 mm DUL 13C-1
PULPROG zg30
TD 65536
SOLVENT CDCl3
NS 2
DS 0
SWH 8992.806 Hz
FIDRES 0.137219 Hz
AQ 3.6438515 sec
RG 64
DW 55.600 usec
DE 8.00 usec
TE 295.7 K
D1 1.00000000 sec
TD0 1

===== CHANNEL f1 =====
NUC1 1H
P1 10.80 usec
PL1 3.00 dB
SF01 300.1324010 MHz
SI 32768
SF 300.1300184 MHz
WDW EM
SSB 0
LB 0.30 Hz
GB 0
PC 1.00

```

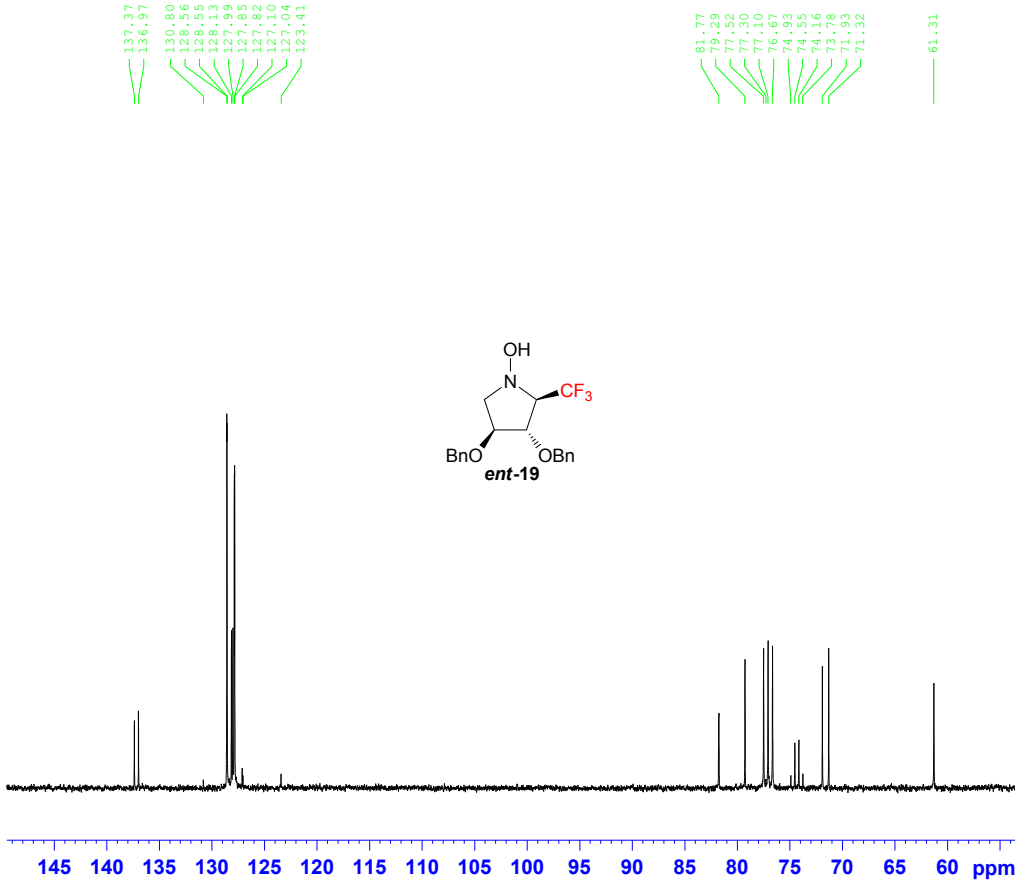

```

NAME lyx4-219a
EXPNO 12
PROCNO 1
Date_ 20101214
Time 9.14
INSTRUM spect
PROBHD 5 mm DUL 13C-1
PULPROG zgpg30
TD 65536
SOLVENT CDCl3
NS 96
DS 4
SWH 17985.611 Hz
FIDRES 0.274439 Hz
AQ 1.8219508 sec
RG 4597.6
DW 27.800 usec
DE 8.00 usec
TE 296.0 K
D1 2.00000000 sec
D11 0.03000000 sec
TD0 1

===== CHANNEL f1 =====
NUC1 13C
P1 12.50 usec
PL1 2.00 dB
SFO1 75.4752953 MHz

===== CHANNEL f2 =====
CPDPRG2 waltz16
NUC2 1H
PCPD2 100.00 usec
PL2 3.00 dB
PL12 22.33 dB
PL13 23.00 dB
SFO2 300.1312005 MHz
SI 32768
SF 75.4677490 MHz
WDW EM
SSB 0
LB 1.00 Hz
GB 0
PC 1.40

```

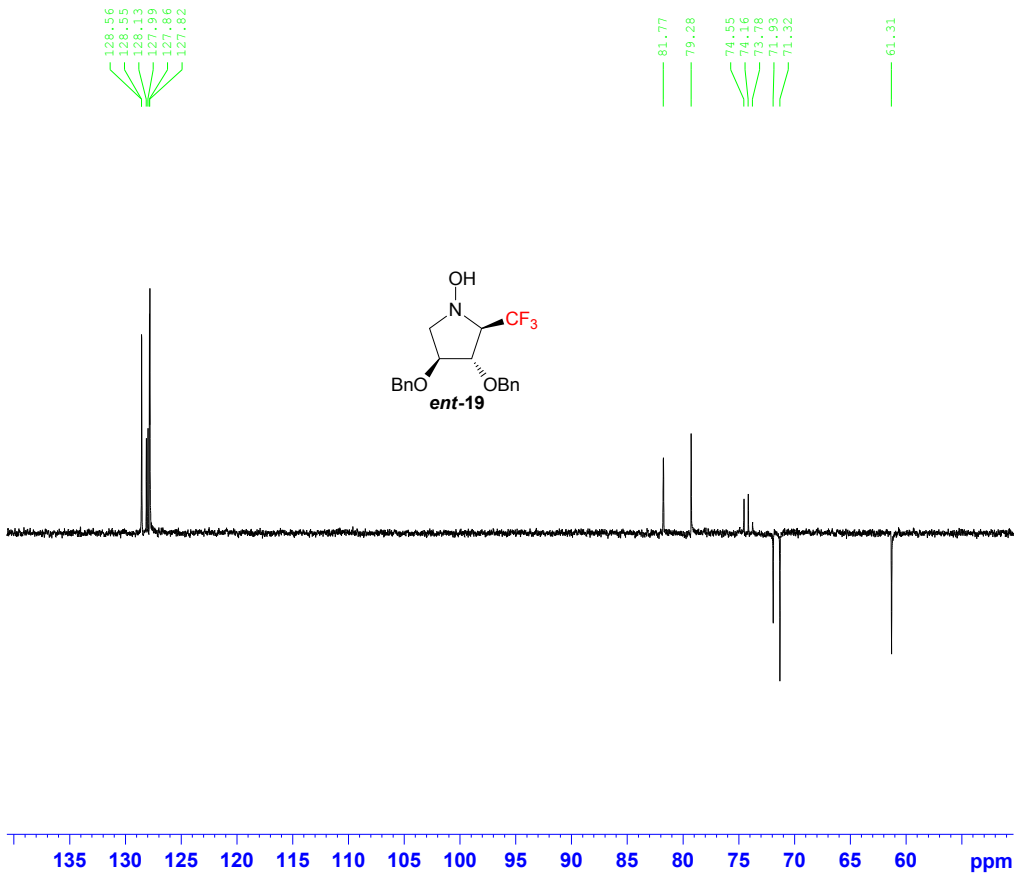

```

NAME lyx4-219a
EXPNO 13
PROCNO 1
Date_ 20101214
Time 9.21
INSTRUM spect
PROBHD 5 mm DUL 13C-1
PULPROG dept135
TD 65536
SOLVENT CDCl3
NS 36
DS 4
SWH 17985.611 Hz
FIDRES 0.274439 Hz
AQ 1.8219508 sec
RG 16384
DW 27.800 usec
DE 8.00 usec
TE 295.8 K
CNST2 145.0000000
D1 2.00000000 sec
D2 0.00344828 sec
D12 0.00002000 sec
TD0 1

===== CHANNEL f1 =====
NUC1 13C
P1 12.50 usec
P2 25.00 usec
PL1 2.00 dB
SFO1 75.4752953 MHz

===== CHANNEL f2 =====
CPDPRG2 waltz16
NUC2 1H
P3 10.80 usec
P4 21.60 usec
PCPD2 100.00 usec
PL2 3.00 dB
PL12 22.33 dB
SFO2 300.1312005 MHz
SI 32768
SF 75.4677490 MHz
WDW EM
SSB 0
LB 1.00 Hz
GB 0
PC 1.40

```

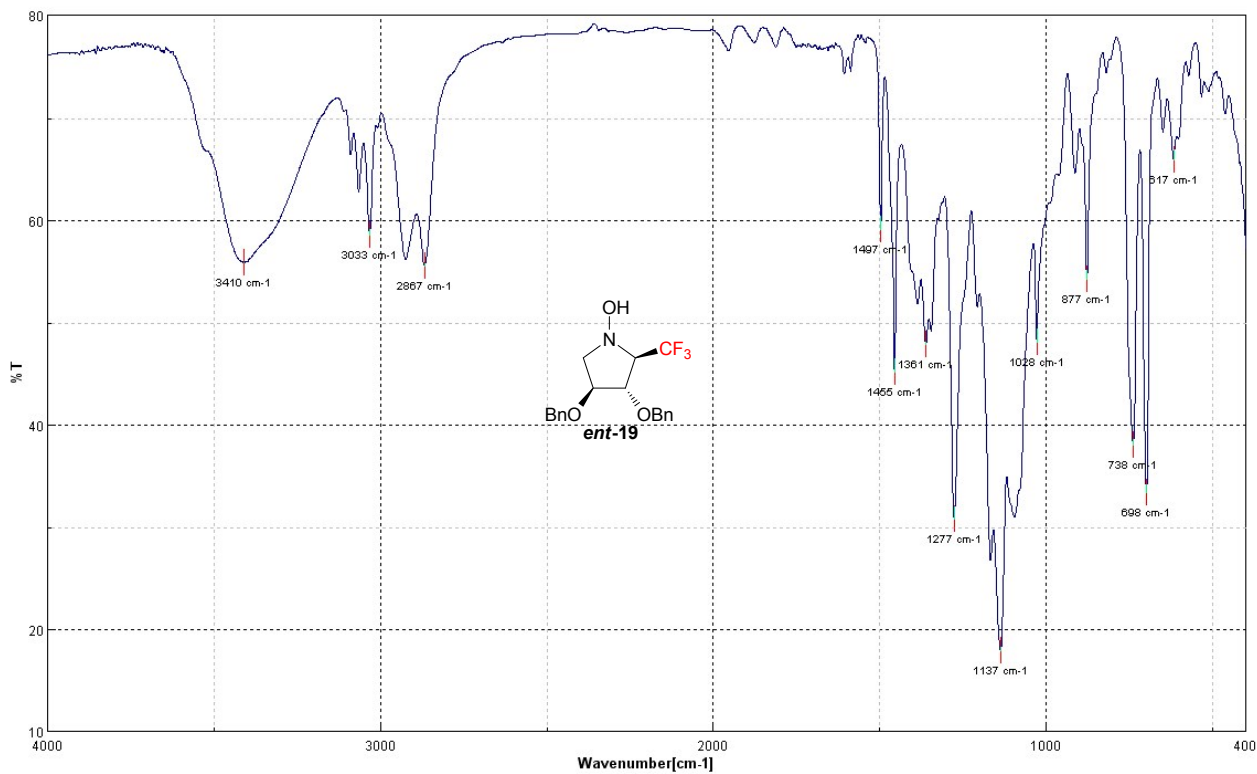

**Compound 8:**

4.789  
 4.495  
 4.402  
 4.343  
 4.330  
 4.317  
 3.677  
 3.665  
 3.636  
 3.624  
 3.517  
 3.476

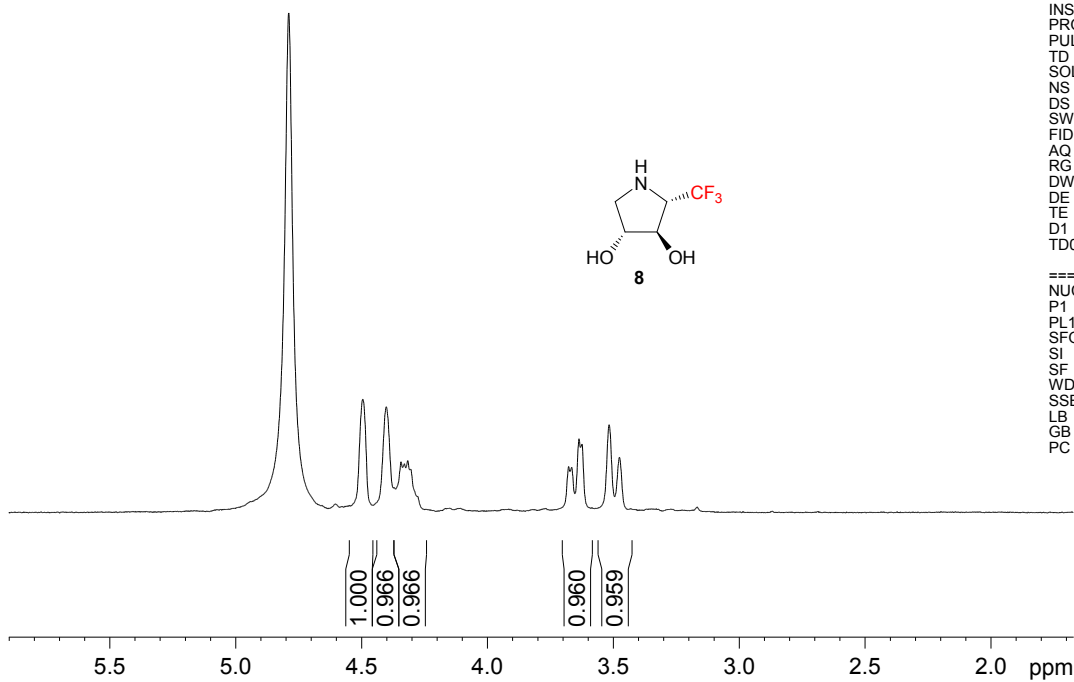

NAME lyx4-222  
 EXPNO 10  
 PROCNO 1  
 Date\_ 20101221  
 Time 9.20  
 INSTRUM spect  
 PROBHD 5 mm DUL 13C-1  
 PULPROG zg30  
 TD 65536  
 SOLVENT D2O  
 NS 1  
 DS 0  
 SWH 8992.806 Hz  
 FIDRES 0.137219 Hz  
 AQ 3.6438515 sec  
 RG 228.1  
 DW 55.600 usec  
 DE 8.00 usec  
 TE 297.6 K  
 D1 1.0000000 sec  
 TD0 1

===== CHANNEL f1 =====  
 NUC1 1H  
 P1 10.80 usec  
 PL1 3.00 dB  
 SFO1 300.1324010 MHz  
 SI 32768  
 SF 300.1299684 MHz  
 WDW EM  
 SSB 0  
 LB 0.30 Hz  
 GB 0  
 PC 1.00

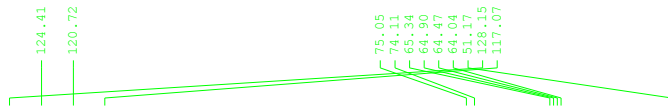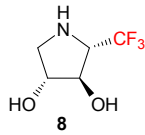

```

NAME      lyx4-222
EXPNO     11
PROCNO    1
Date_     20101221
Time      9.23
INSTRUM   spect
PROBHD    5 mm DUL 13C-1
PULPROG   zgpg30
TD         65536
SOLVENT   D2O
NS         591
DS         4
SWH        17985.611 Hz
FIDRES     0.274439 Hz
AQ         1.8219508 sec
RG         14596.5
DW         27.800 usec
DE         8.00 usec
TE         297.9 K
D1         2.00000000 sec
D11        0.03000000 sec
TD0        1
  
```

```

===== CHANNEL f1 =====
NUC1       13C
P1         12.50 usec
PL1        2.00 dB
SFO1       75.4752953 MHz
  
```

```

===== CHANNEL f2 =====
CPDPRG2    waltz16
NUC2        1H
PCPD2       100.00 usec
PL2         3.00 dB
PLI2        22.33 dB
PLI3        23.00 dB
SFO2       300.1312005 MHz
SI          32768
SF         75.4677490 MHz
WDW         EM
SSB         0
LB          1.00 Hz
GB          0
PC          1.40
  
```

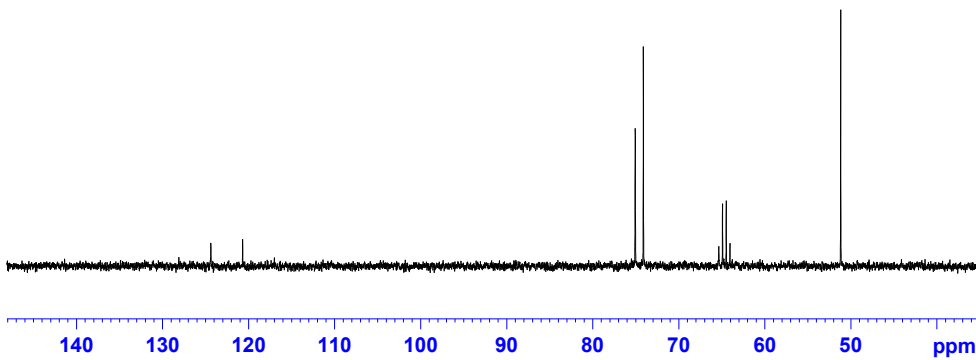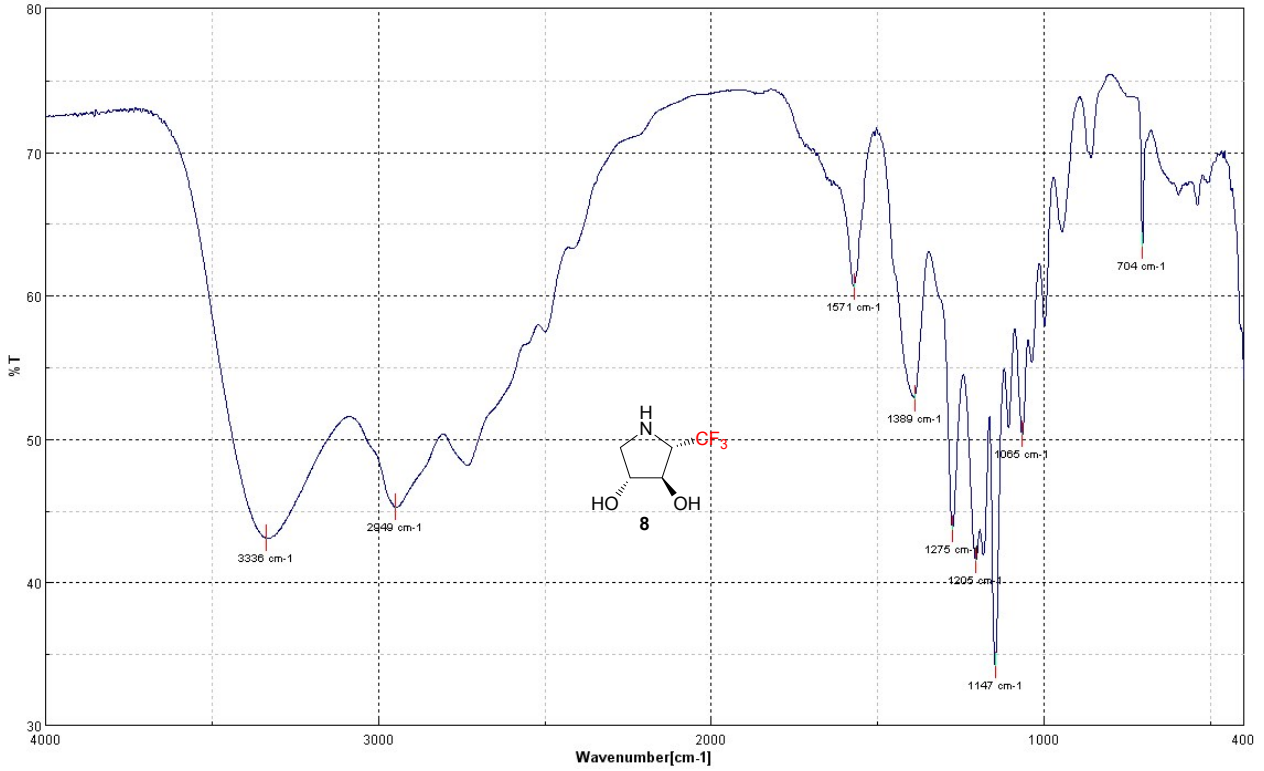

7#

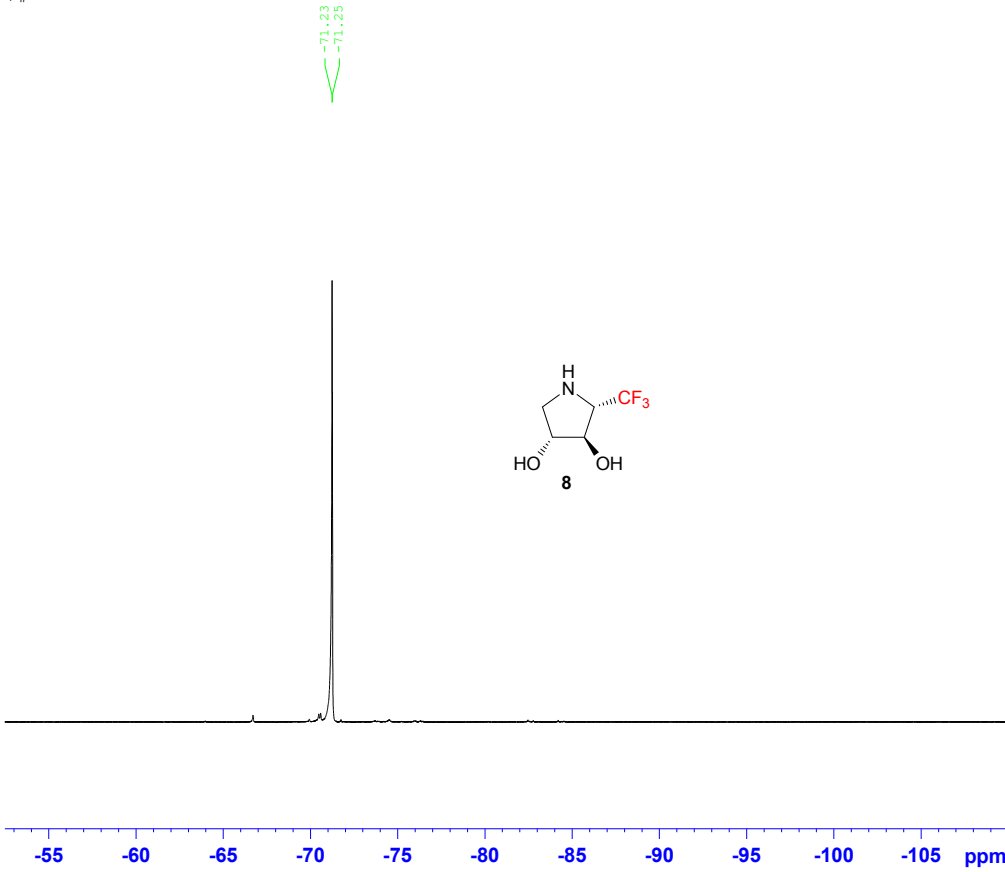

```
Current Data Parameters
NAME      19F
EXPNO    7
PROCNO   1

F2 - Acquisition Parameters
Date_    20110128
Time     8.26
INSTRUM  spect
PROBHD   5 mm BBO BB-1H
PULPROG  zgfgln
TD       32768
SOLVENT  CDCl3
NS       16
DS       0
SWH      75187.969 Hz
FIDRES   2.294555 Hz
AQ       0.2179572 sec
RG       32
DW       6.650 usec
DE       6.00 usec
TE       673.2 K
D1       1.00000000 sec

===== CHANNEL f1 =====
NUC1     19F
P1       12.50 usec
PL1      0.00 dB
SFO1     376.4418792 MHz

F2 - Processing parameters
SI       65536
SF       376.4983540 MHz
WDW      EM
SSB      0
LB       5.00 Hz
GB       0
PC       0.10
```

Compound *ent*-8:

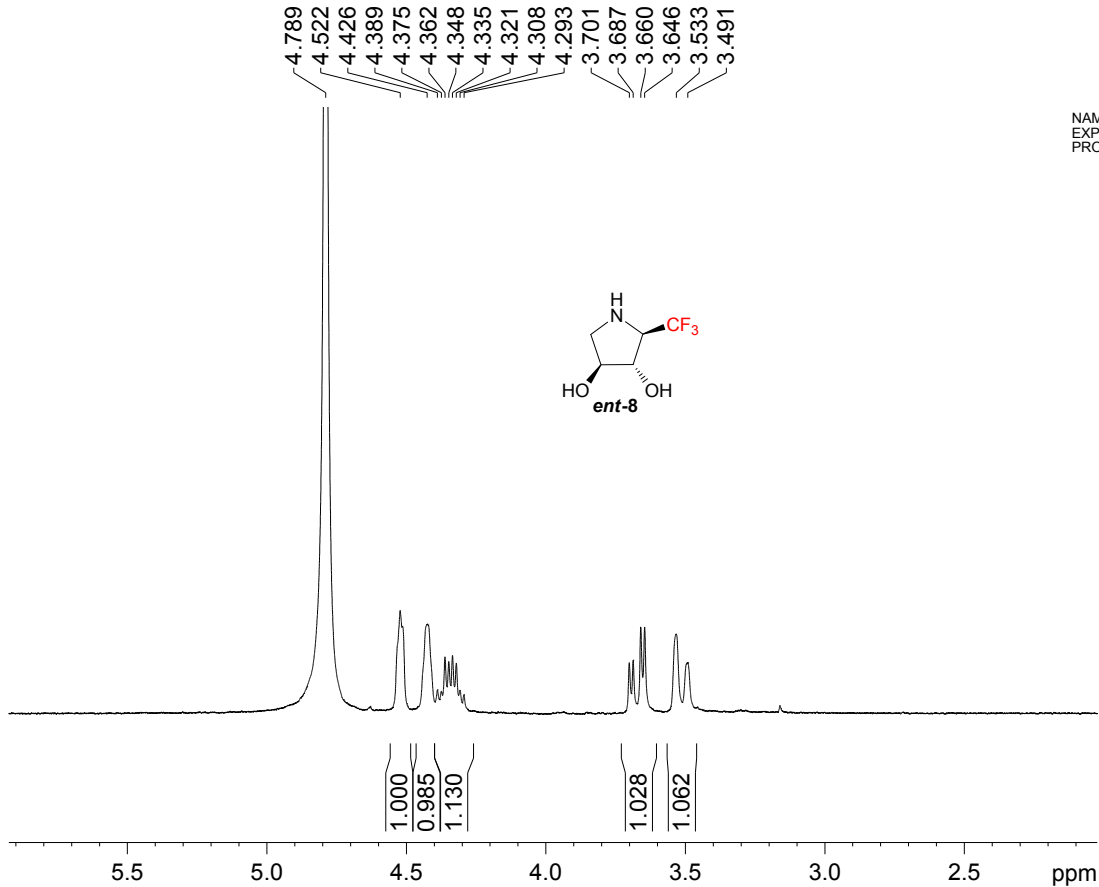

lyx-220

```
NAME      lyx-2016
EXPNO    39
PROCNO   1
```

124.16  
120.47

74.82  
73.87  
65.07  
64.64  
64.20  
63.77

50.99

NAME lyx4-220  
EXPNO 12  
PROCNO 1  
Date\_ 20101220  
Time 17.10  
INSTRUM spect  
PROBHD 5 mm DUL 13C-1  
PULPROG zgpg30  
TD 65536  
SOLVENT D2O  
NS 66  
DS 4  
SWH 17985.611 Hz  
FIDRES 0.274439 Hz  
AQ 1.8219508 sec  
RG 16384  
DW 27.800 usec  
DE 8.00 usec  
TE 298.0 K  
D1 2.0000000 sec  
D11 0.0300000 sec  
TD0 1

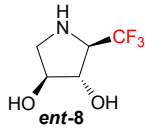

===== CHANNEL f1 =====  
NUC1 13C  
P1 12.50 usec  
PL1 2.00 dB  
SFO1 75.4752953 MHz

===== CHANNEL f2 =====  
CPDPRG2 waltz16  
NUC2 1H  
PCPD2 100.00 usec  
PL2 3.00 dB  
PL12 22.33 dB  
PL13 23.00 dB  
SFO2 300.1312005 MHz  
SI 32768  
SF 75.4677490 MHz  
WDW EM  
SSB 0  
LB 1.00 Hz  
GB 0  
PC 1.40

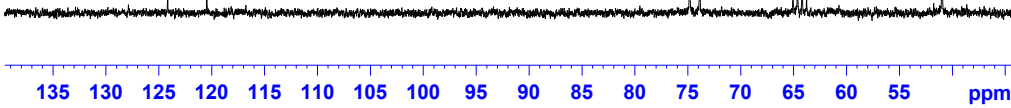

74.82  
73.87

65.07  
64.64  
64.20  
63.77

50.98

NAME lyx4-220  
EXPNO 13  
PROCNO 1  
Date\_ 20101220  
Time 17.16  
INSTRUM spect  
PROBHD 5 mm DUL 13C-1  
PULPROG dept135  
TD 65536  
SOLVENT D2O  
NS 22  
DS 4  
SWH 17985.611 Hz  
FIDRES 0.274439 Hz  
AQ 1.8219508 sec  
RG 16384  
DW 27.800 usec  
DE 8.00 usec  
TE 298.2 K  
CNST2 145.0000000  
D1 2.0000000 sec  
D2 0.00344828 sec  
D12 0.00002000 sec  
TD0 1

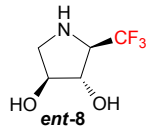

===== CHANNEL f1 =====  
NUC1 13C  
P1 12.50 usec  
P2 25.00 usec  
PL1 2.00 dB  
SFO1 75.4752953 MHz

===== CHANNEL f2 =====  
CPDPRG2 waltz16  
NUC2 1H  
P3 10.80 usec  
P4 21.60 usec  
PCPD2 100.00 usec  
PL2 3.00 dB  
PL12 22.33 dB  
SFO2 300.1312005 MHz  
SI 32768  
SF 75.4677490 MHz  
WDW EM  
SSB 0  
LB 1.00 Hz  
GB 0  
PC 1.40

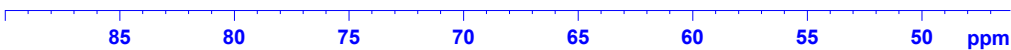



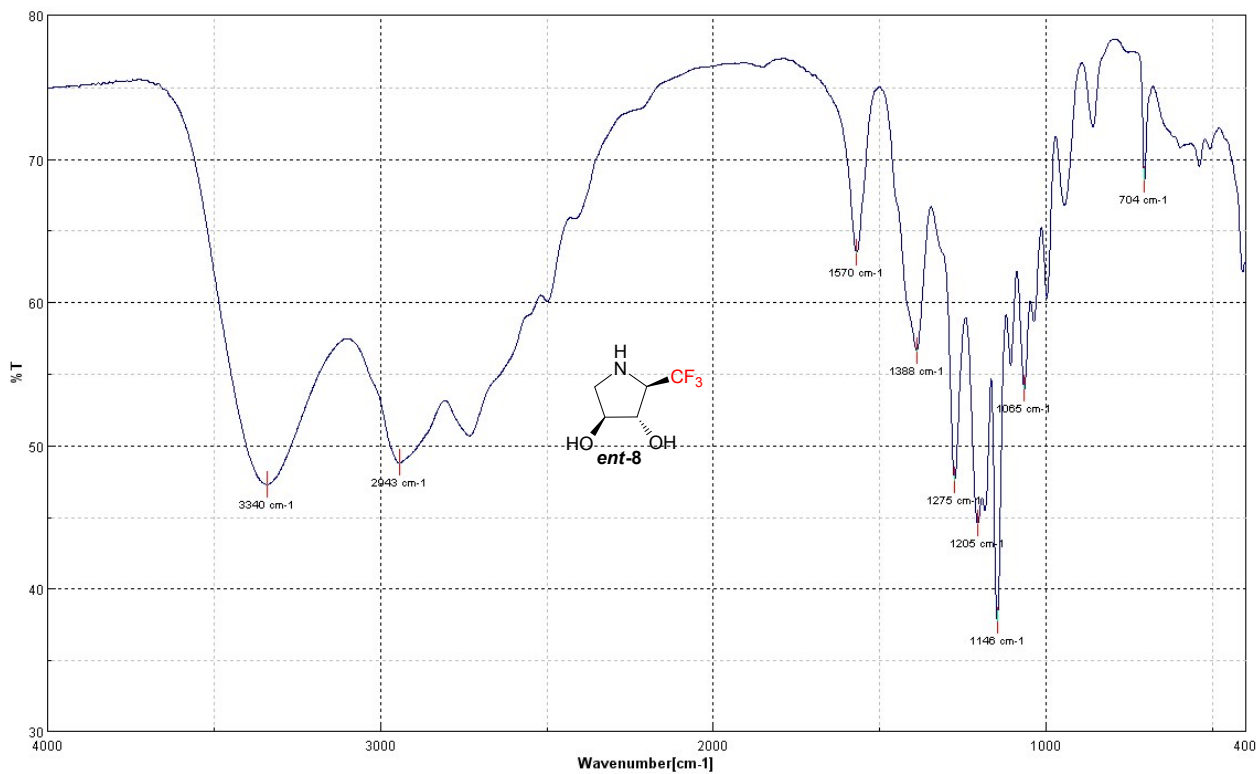

6#

--71.08  
--71.09

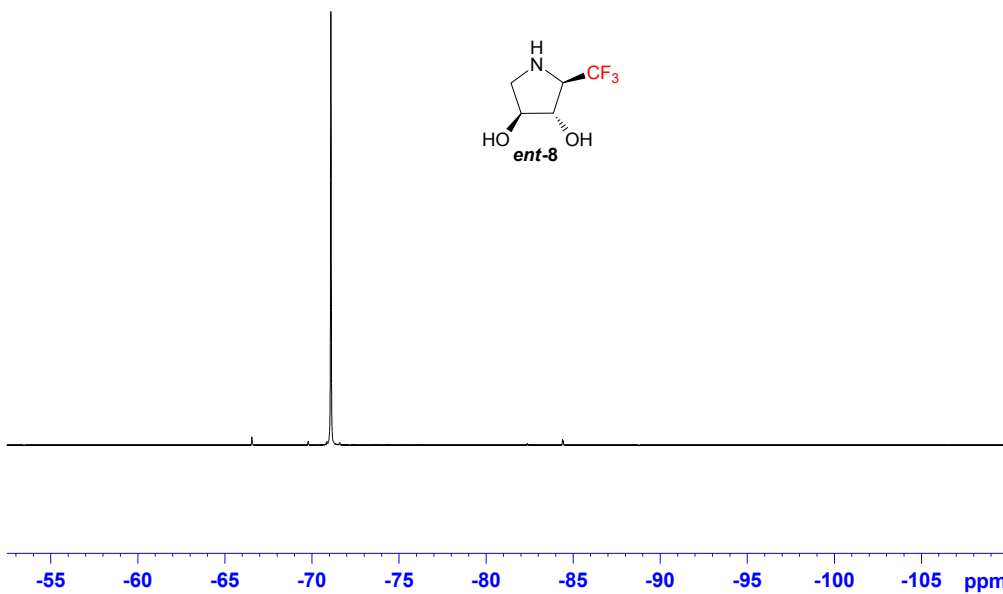

Current Data Parameters  
NAME 19F  
EXPNO 6  
PROCNO 1

F2 - Acquisition Parameters  
Date\_ 20110128  
Time 8.24  
INSTRUM spect  
PROBHD 5 mm BBO BB-1H  
PULPROG zgflgn  
TD 32768  
SOLVENT CDCl3  
NS 16  
DS 0  
SWH 75187.969 Hz  
FIDRES 2.294555 Hz  
AQ 0.2179572 sec  
RG 32  
DW 6.650 usec  
DE 6.00 usec  
TE 673.2 K  
D1 1.00000000 sec

===== CHANNEL f1 =====  
NUC1 19F  
P1 12.50 usec  
PL1 0.00 dB  
SFO1 376.4418792 MHz

F2 - Processing parameters  
SI 65536  
SF 376.4983540 MHz  
WDW EM  
SSB 0  
LB 5.00 Hz  
GB 0  
PC 0.10

**Compound 21a:**

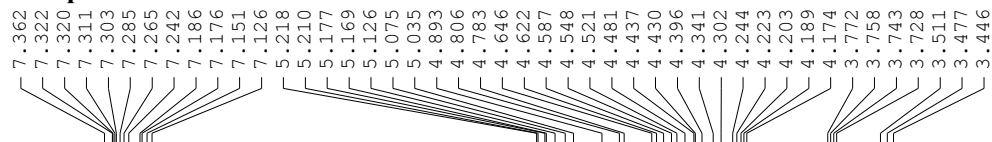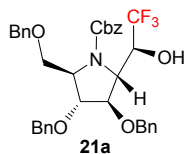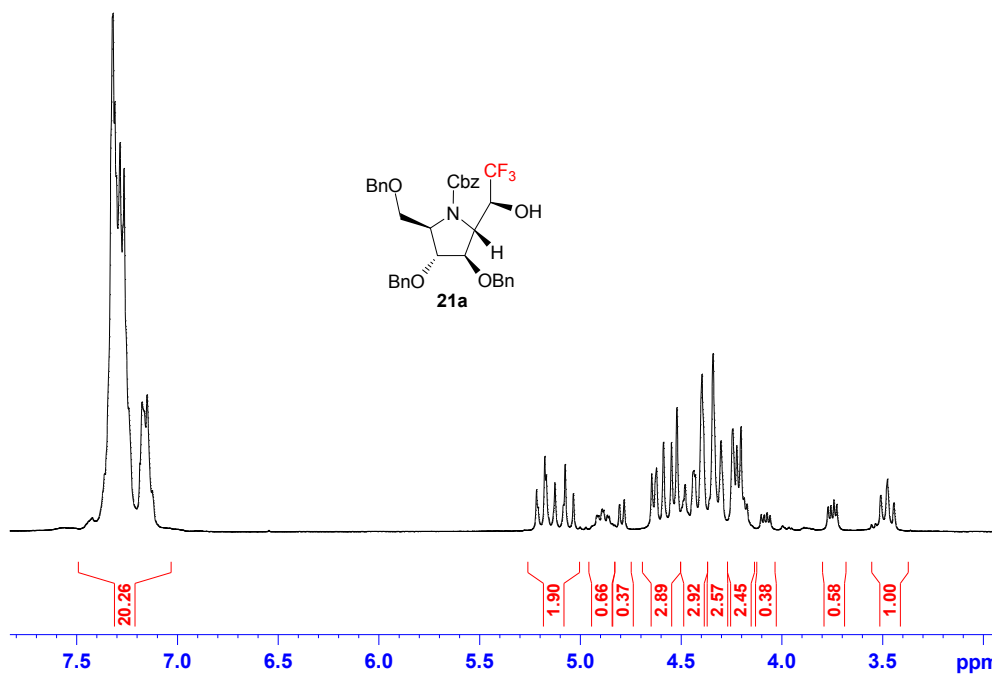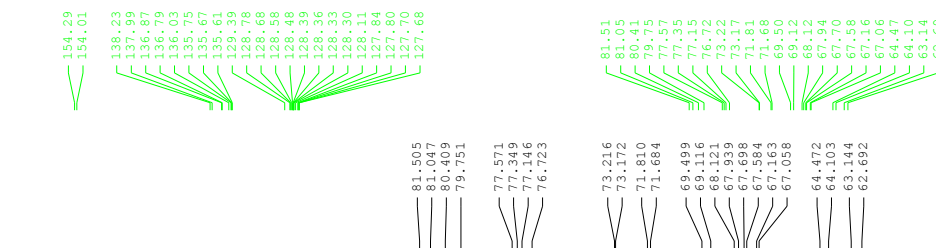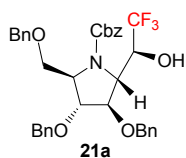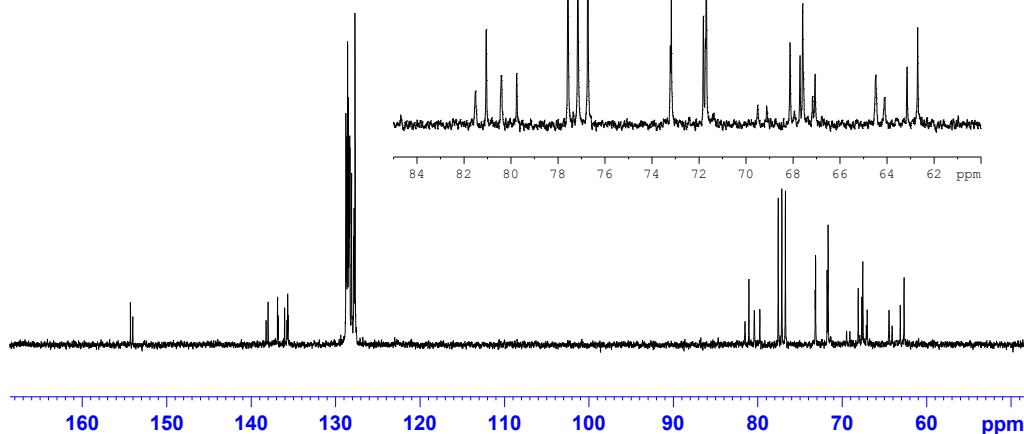

```

NAME lyx4-237a
EXPNO 10
PROCNO 1
Date_ 20110224
Time 22.24
INSTRUM spect
PROBHD 5 mm DUL 13C-1
PULPROG zg30
TD 65536
SOLVENT CDCl3
NS 2
DS 0
SWH 8992.806 Hz
FIDRES 0.137219 Hz
AQ 3.6438515 sec
RG 45.3
DW 55.600 usec
DE 8.00 usec
TE 296.0 K
D1 1.00000000 sec
TD0 1
    
```

```

===== CHANNEL f1 =====
NUC1 1H
P1 10.80 usec
PL1 3.00 dB
SFO1 300.1324010 MHz
SI 32768
SF 300.1300276 MHz
WDW EM
SSB 0
LB 0.30 Hz
GB 0
PC 1.00
    
```

```

NAME lyx4-237a
EXPNO 20
PROCNO 1
Date_ 20110225
Time 13.13
INSTRUM spect
PROBHD 5 mm DUL 13C-1
PULPROG zgpg30
TD 65536
SOLVENT CDCl3
NS 104
DS 4
SWH 17985.611 Hz
FIDRES 0.274439 Hz
AQ 1.8219508 sec
RG 4597.6
DW 27.800 usec
DE 8.00 usec
TE 296.1 K
D1 2.00000000 sec
D11 0.03000000 sec
TD0 1
    
```

```

===== CHANNEL f1 =====
NUC1 13C
P1 12.50 usec
PL1 2.00 dB
SFO1 75.4752953 MHz
    
```

```

===== CHANNEL f2 =====
CPDPRG2 waltz16
NUC2 1H
PCPD2 100.00 usec
PL2 3.00 dB
PL12 22.33 dB
PL13 23.00 dB
SFO2 300.1312005 MHz
SI 32768
SF 75.4677490 MHz
WDW EM
SSB 0
LB 1.00 Hz
GB 0
PC 1.40
    
```

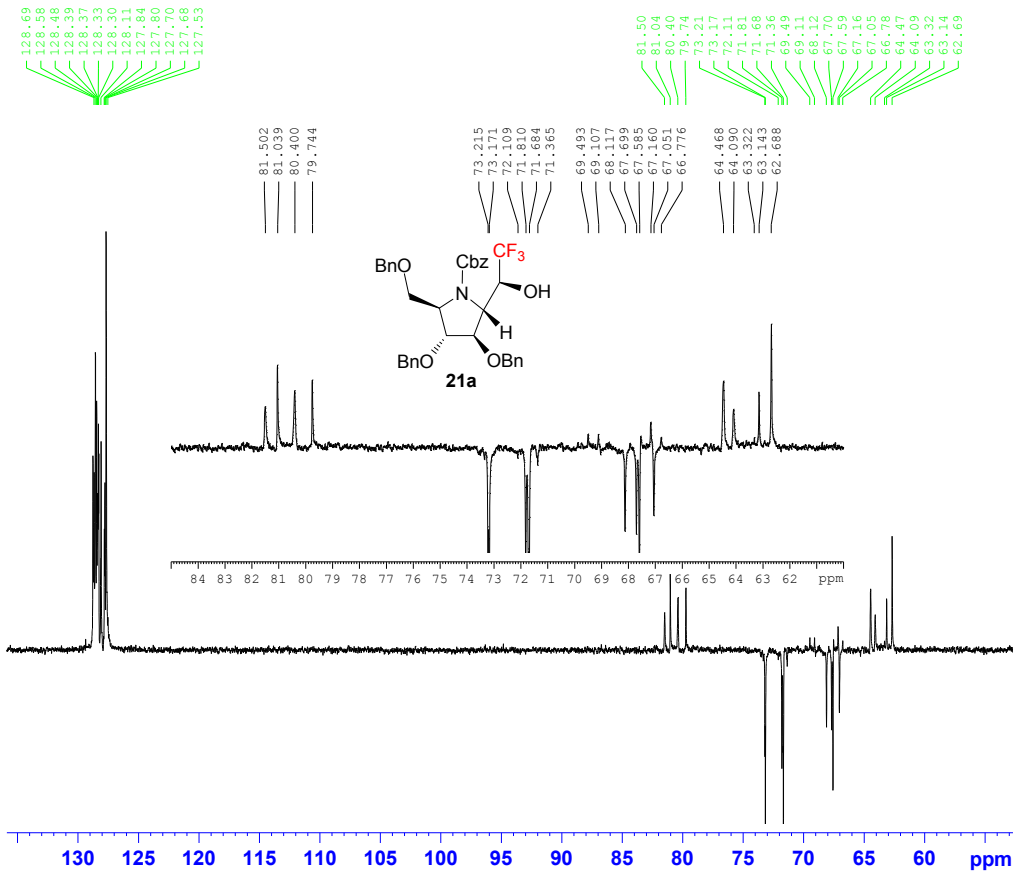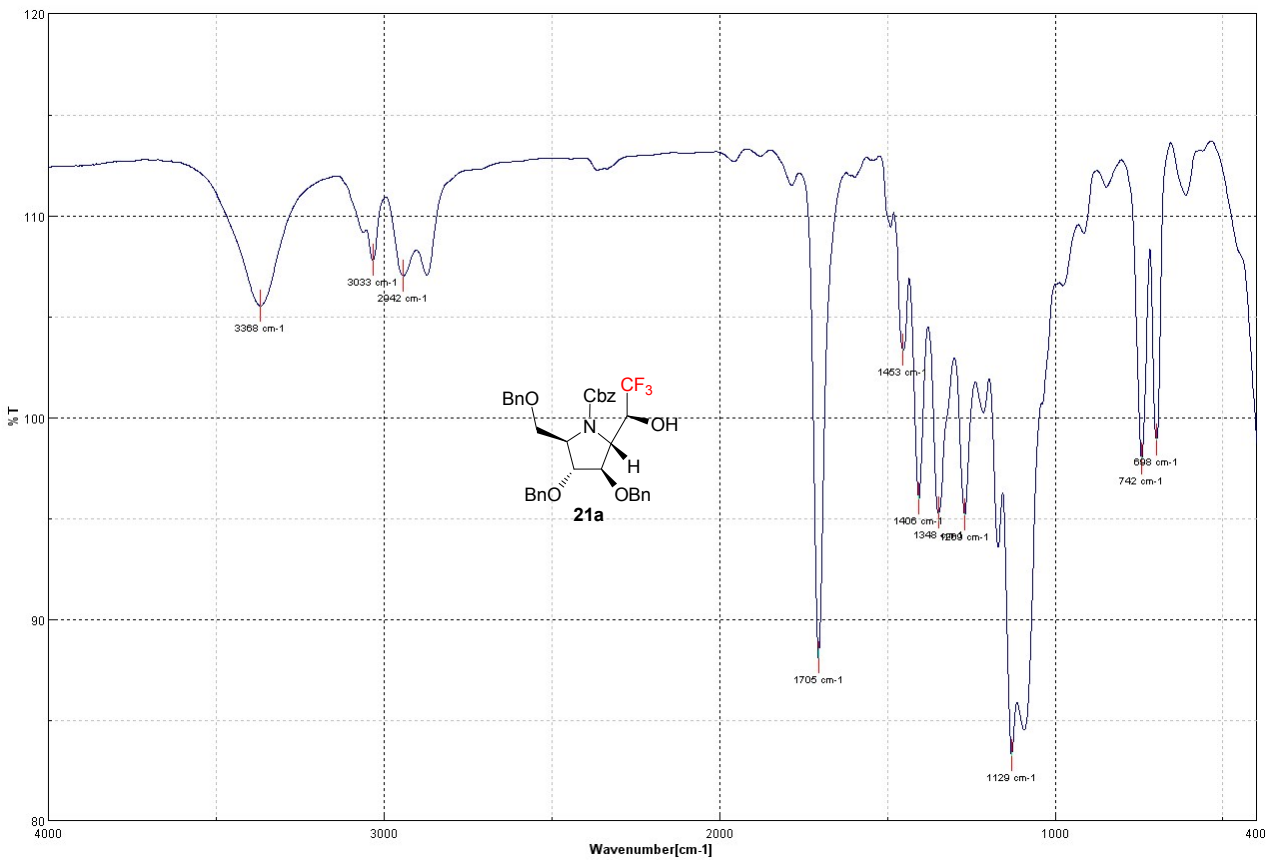

**Compound 21b:**

7.317  
7.296  
7.281  
7.266  
7.260  
7.230  
7.170  
7.155  
5.197  
5.157  
5.132  
5.092  
5.010  
4.982  
4.627  
4.583  
4.542  
4.519  
4.442  
4.425  
4.402  
4.385  
4.335  
4.296  
4.276  
4.246  
4.222  
4.197  
4.184  
4.162  
4.149  
3.999  
3.893  
3.879  
3.863  
3.850  
3.527  
3.463

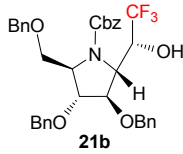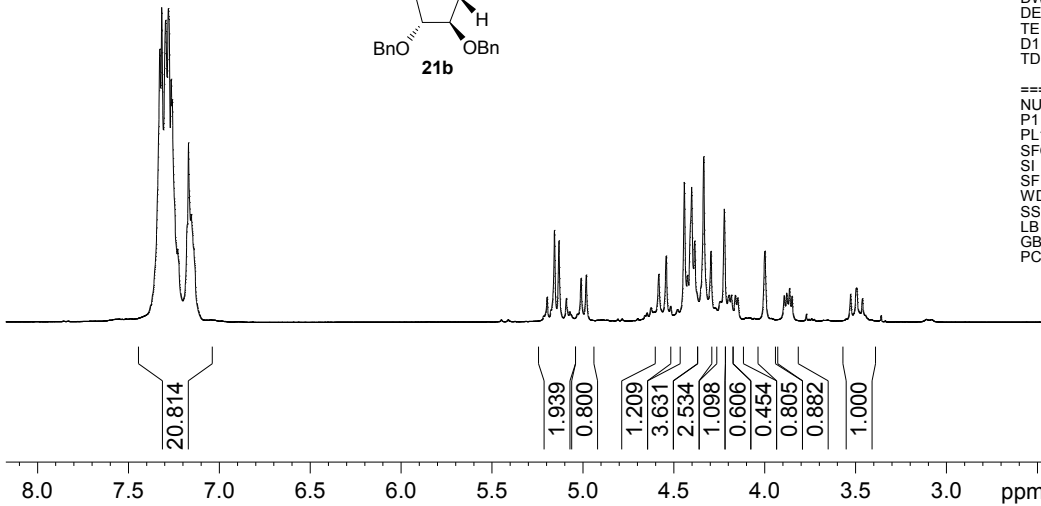

NAME lyx4-237b  
EXPNO 10  
PROCNO 1  
Date\_ 20110224  
Time 22.19  
INSTRUM spect  
PROBHD 5 mm DUL 13C-1  
PULPROG zg30  
TD 65536  
SOLVENT CDCl3  
NS 3  
DS 0  
SWH 8992.806 Hz  
FIDRES 0.137219 Hz  
AQ 3.6438515 sec  
RG 40.3  
DW 55.800 usec  
DE 8.00 usec  
TE 296.0 K  
D1 1.0000000 sec  
TD0 1

===== CHANNEL f1 =====  
NUC1 1H  
P1 10.80 usec  
PL1 3.00 dB  
SFO1 300.132410 MHz  
SI 32768  
SF 300.1300324 MHz  
WDW EM  
SSB 0  
LB 0.30 Hz  
GB 0  
PC 1.00

156.70  
138.08  
137.26  
137.00  
135.58  
128.75  
128.60  
128.55  
128.48  
128.04  
128.02  
127.82  
127.68  
127.63

82.335  
82.209  
77.592  
77.368  
77.168  
76.744  
73.149  
72.767  
72.389  
72.006  
71.701  
71.425  
71.379  
71.170  
71.01  
71.43  
71.38  
68.41  
67.85  
62.87

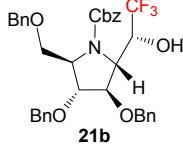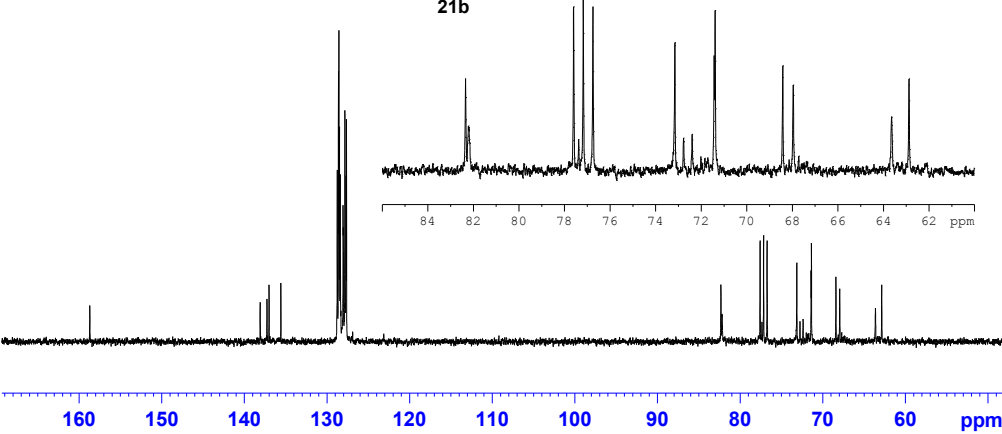

NAME lyx4-237b  
EXPNO 22  
PROCNO 1  
Date\_ 20110224  
Time 12.49  
INSTRUM spect  
PROBHD 5 mm DUL 13C-1  
PULPROG zgpg30  
TD 65536  
SOLVENT CDCl3  
NS 49  
DS 4  
SWH 17985.611 Hz  
FIDRES 0.274439 Hz  
AQ 1.8219508 sec  
RG 5792.6  
DW 27.800 usec  
DE 8.00 usec  
TE 296.3 K  
D1 2.00000000 sec  
D11 0.03000000 sec  
TD0 1

===== CHANNEL f1 =====  
NUC1 13C  
P1 12.50 usec  
PL1 2.00 dB  
SFO1 75.4752953 MHz

===== CHANNEL f2 =====  
CPDPRG2 waltz16  
NUC2 1H  
PCPD2 100.00 usec  
PL2 3.00 dB  
PL12 22.33 dB  
PL13 23.00 dB  
SFO2 300.1312005 MHz  
SI 32768  
SF 75.4677490 MHz  
WDW EM  
SSB 0  
LB 1.00 Hz  
GB 0  
PC 1.40

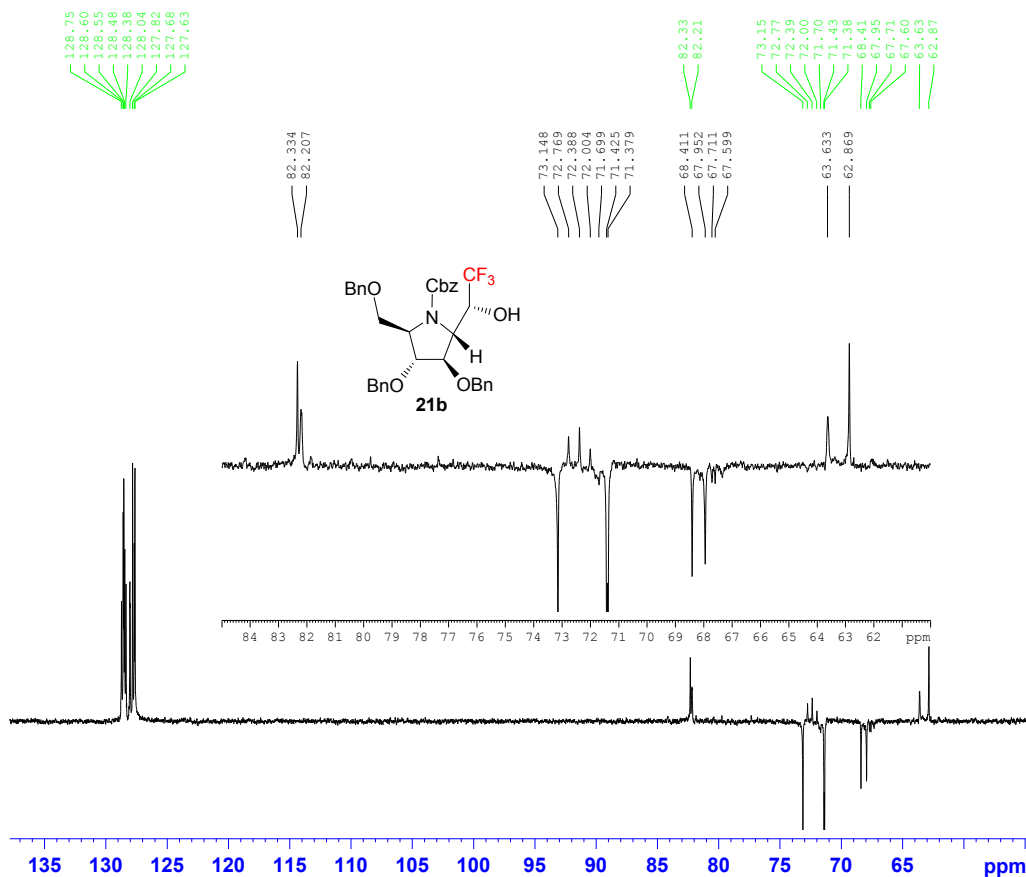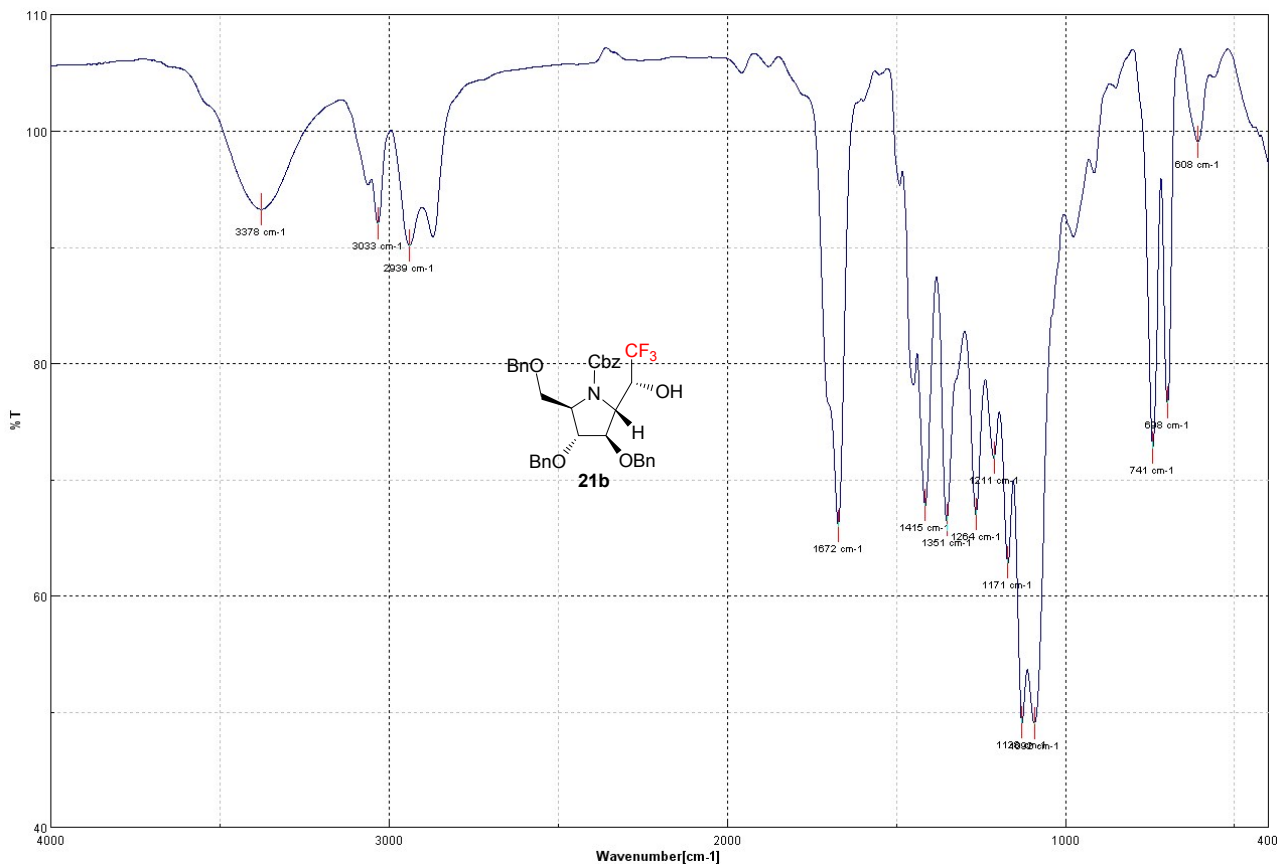

**Compound ent-21a:**

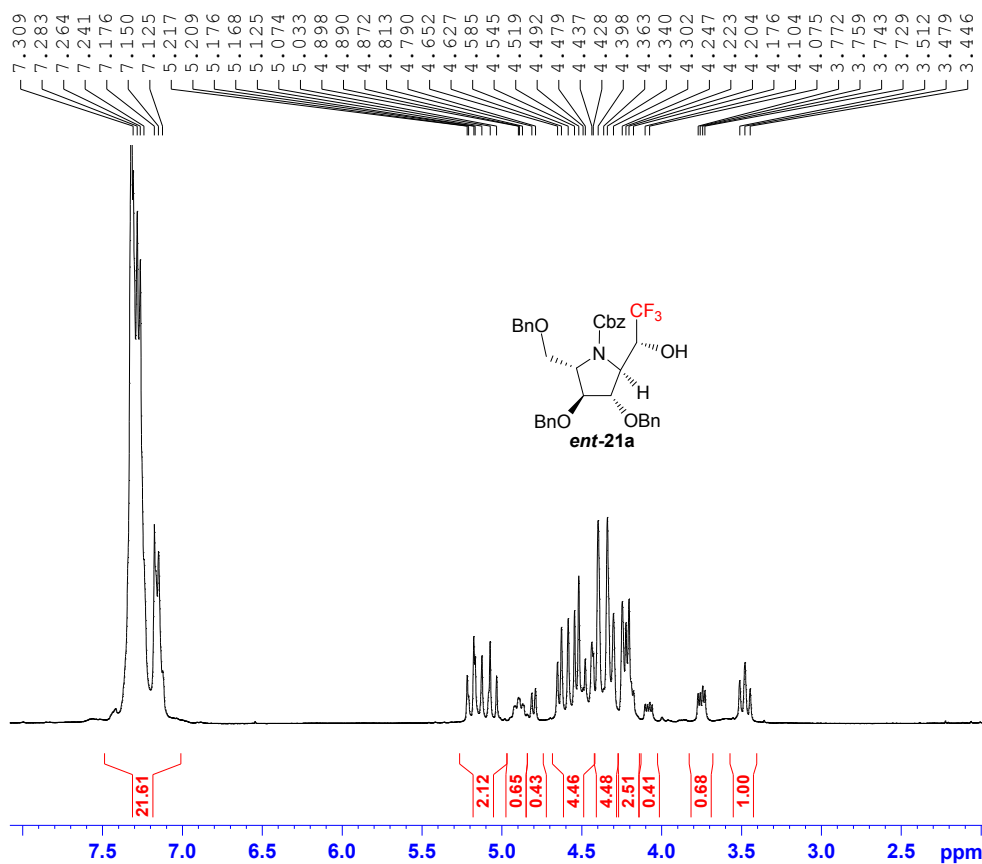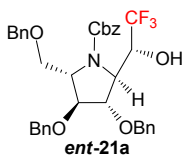

```

NAME      lyx4-224a
EXPNO    10
PROCNO   1
Date_    20110228
Time     12.34
INSTRUM  spect
PROBHD   5 mm DUL 13C-1
PULPROG  zg30
TD       65536
SOLVENT  CDCl3
NS       4
DS       0
SWH      8992.806 Hz
FIDRES   0.137219 Hz
AQ       3.6438515 sec
RG       40.3
DW       55.600 usec
DE       8.00 usec
TE       295.8 K
D1       1.00000000 sec
TD0      1
    
```

```

===== CHANNEL f1 =====
NUC1     1H
P1       10.80 usec
PL1      3.00 dB
SFO1     300.1324010 MHz
SI       32768
SF       300.1300310 MHz
WDW      EM
SSB      0
LB       0.30 Hz
GB       0
PC       1.00
    
```

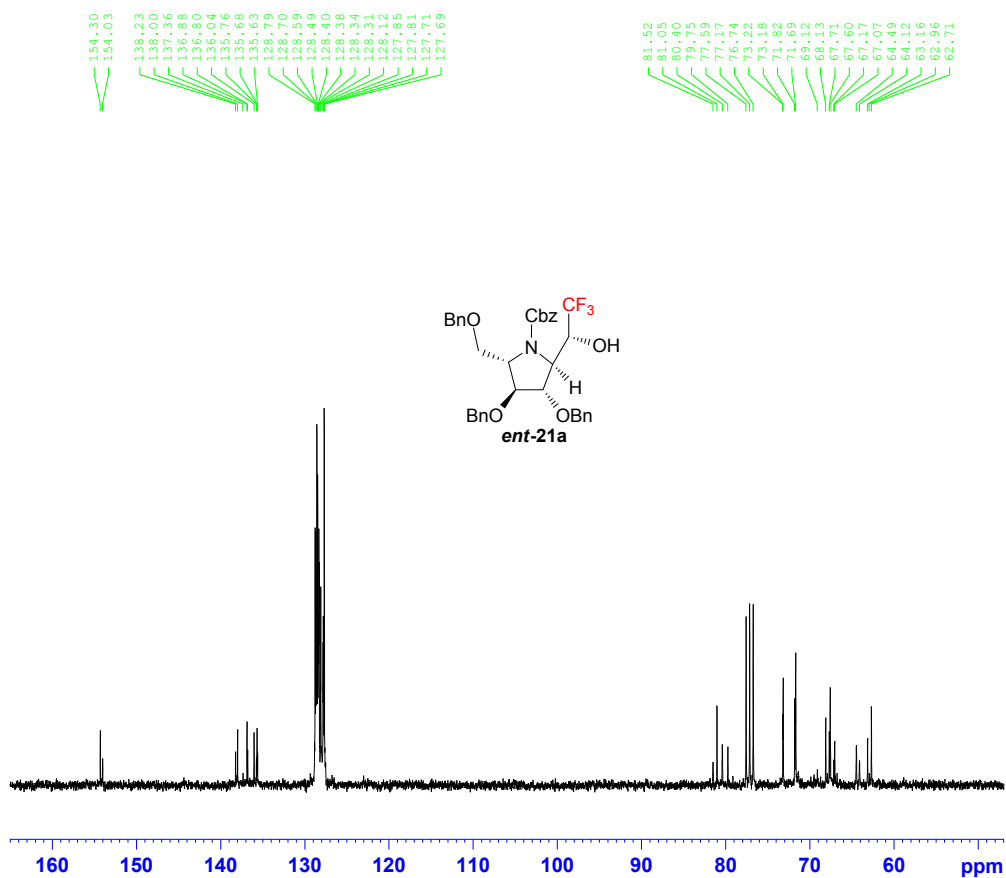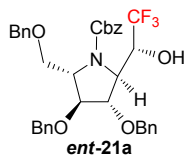

```

NAME      lyx4-224a
EXPNO    11
PROCNO   1
Date_    20110228
Time     12.37
INSTRUM  spect
PROBHD   5 mm DUL 13C-1
PULPROG  zgpg30
TD       65536
SOLVENT  CDCl3
NS       65
DS       4
SWH      17985.611 Hz
FIDRES   0.274439 Hz
AQ       1.8219508 sec
RG       5160.6
DW       27.800 usec
DE       8.00 usec
TE       296.0 K
D1       2.00000000 sec
D11      0.03000000 sec
TD0      1
    
```

```

===== CHANNEL f1 =====
NUC1     13C
P1       12.50 usec
PL1      2.00 dB
SFO1     75.4752953 MHz

===== CHANNEL f2 =====
CPDPRG2  waltz16
NUC2     1H
PCPD2    100.00 usec
PL2      3.00 dB
PL12     22.33 dB
PL13     23.00 dB
SFO2     300.1312005 MHz
SI       32768
SF       75.4677490 MHz
WDW      EM
SSB      0
LB       1.00 Hz
GB       0
PC       1.40
    
```

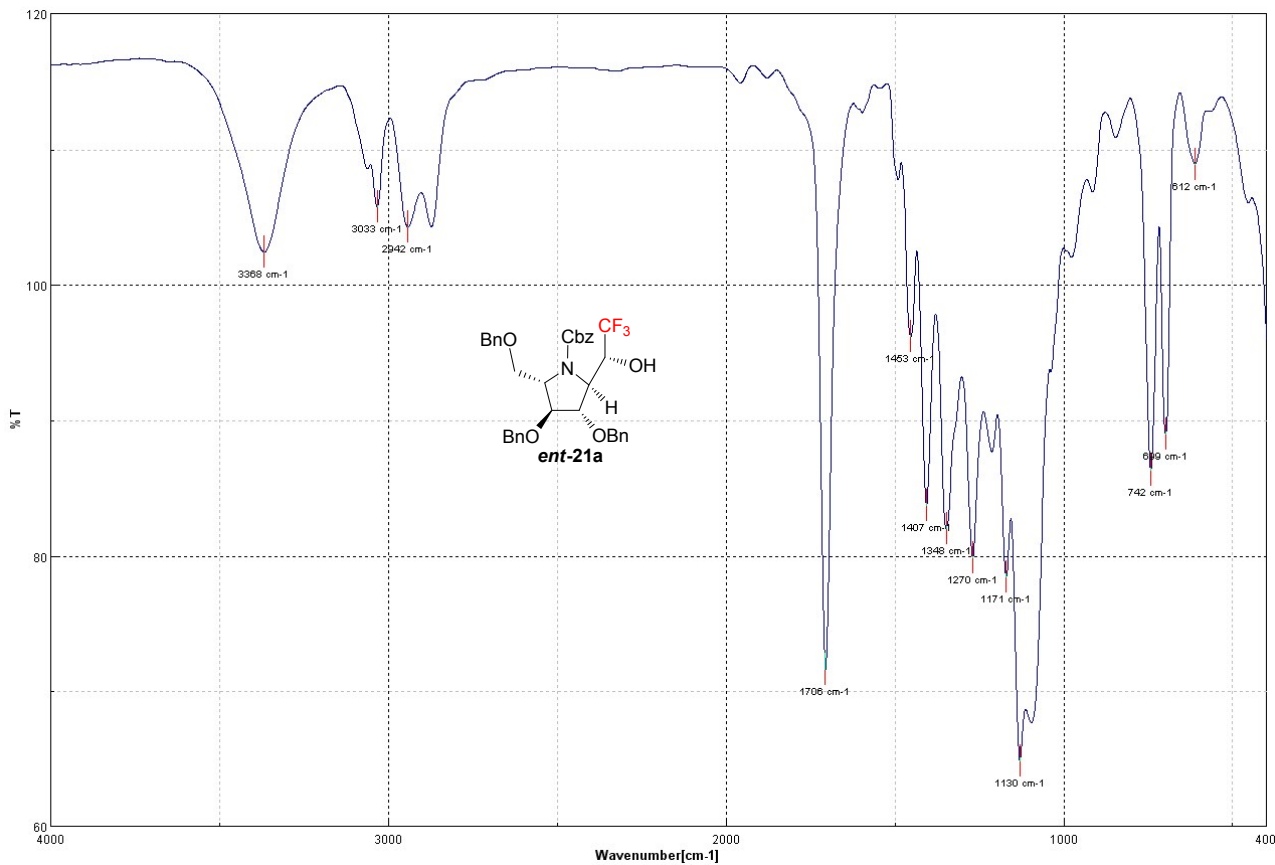

**Compound ent-21b:**

7.325  
7.303  
7.290  
7.285  
7.273  
7.267  
7.259  
7.233  
7.228  
7.212  
7.200  
7.182  
7.171  
7.159  
5.164  
5.142  
4.985  
4.957  
4.590  
4.549  
4.446  
4.435  
4.405  
4.392  
4.341  
4.301  
4.220  
4.193  
4.180  
4.158  
4.145  
3.996  
3.893  
3.879  
3.863  
3.850  
3.526  
3.495  
3.491

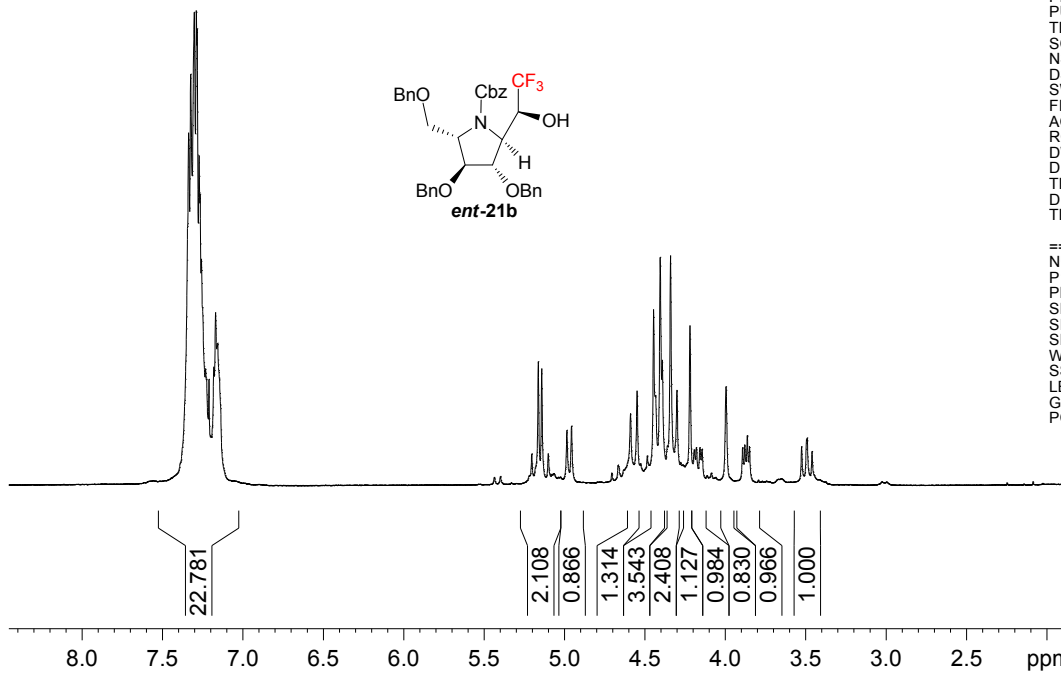

NAME lyx4-224b  
EXPNO 10  
PROCNO 1  
Date\_ 20110228  
Time 12.44  
INSTRUM spect  
PROBHD 5 mm DUL 13C-1  
PULPROG zg30  
TD 65536  
SOLVENT CDCl3  
NS 2  
DS 0  
SWH 8992.806 Hz  
FIDRES 0.137219 Hz  
AQ 3.6438515 sec  
RG 71.8  
DW 55.600 usec  
DE 8.00 usec  
TE 295.7 K  
D1 1.00000000 sec  
TD0 1

===== CHANNEL f1 =====  
NUC1 1H  
P1 10.80 usec  
PL1 3.00 dB  
SF01 300.1324010 MHz  
SI 32768  
SF 300.1300204 MHz  
WDW EM  
SSB 0  
LB 0.30 Hz  
GB 0  
PC 1.00

158.66

138.04  
137.21  
136.96  
135.53  
128.71  
128.57  
128.44  
128.34  
128.01  
127.78  
127.64  
127.59

82.32  
82.15  
77.52  
77.10  
76.67  
72.73  
72.35  
71.39  
71.35  
68.38  
67.91  
63.56  
62.81

NAME lyx4-224b  
EXPNO 11  
PROCNO 1  
Date\_ 20110228  
Time\_ 12.46  
INSTRUM spect  
PROBHD 5 mm DUL 13C-1  
PULPROG zgpg30  
TD 65536  
SOLVENT CDC13  
NS 94  
DS 4  
SWH 17985.611 Hz  
FIDRES 0.274439 Hz  
AQ 1.8219508 sec  
RG 4096  
DW 27.800 usec  
DE 8.00 usec  
TE 295.9 K  
D1 2.0000000 sec  
D11 0.0300000 sec  
TD0 1

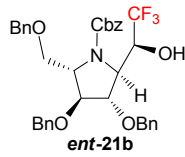

===== CHANNEL f1 =====  
NUC1 13C  
P1 12.50 usec  
PL1 2.00 dB  
SFO1 75.4752953 MHz  
  
===== CHANNEL f2 =====  
CPDPRG2 waltz16  
NUC2 1H  
PCPD2 100.00 usec  
PL2 3.00 dB  
PL12 22.33 dB  
PL13 23.00 dB  
SFO2 300.1312005 MHz  
SI 32768  
SF 75.4677490 MHz  
WDW EM  
SSB 0  
LB 1.00 Hz  
GB 0  
PC 1.40

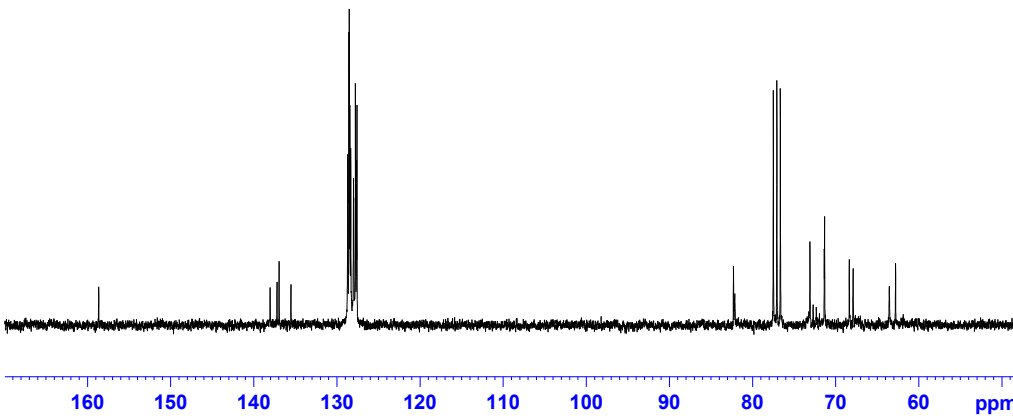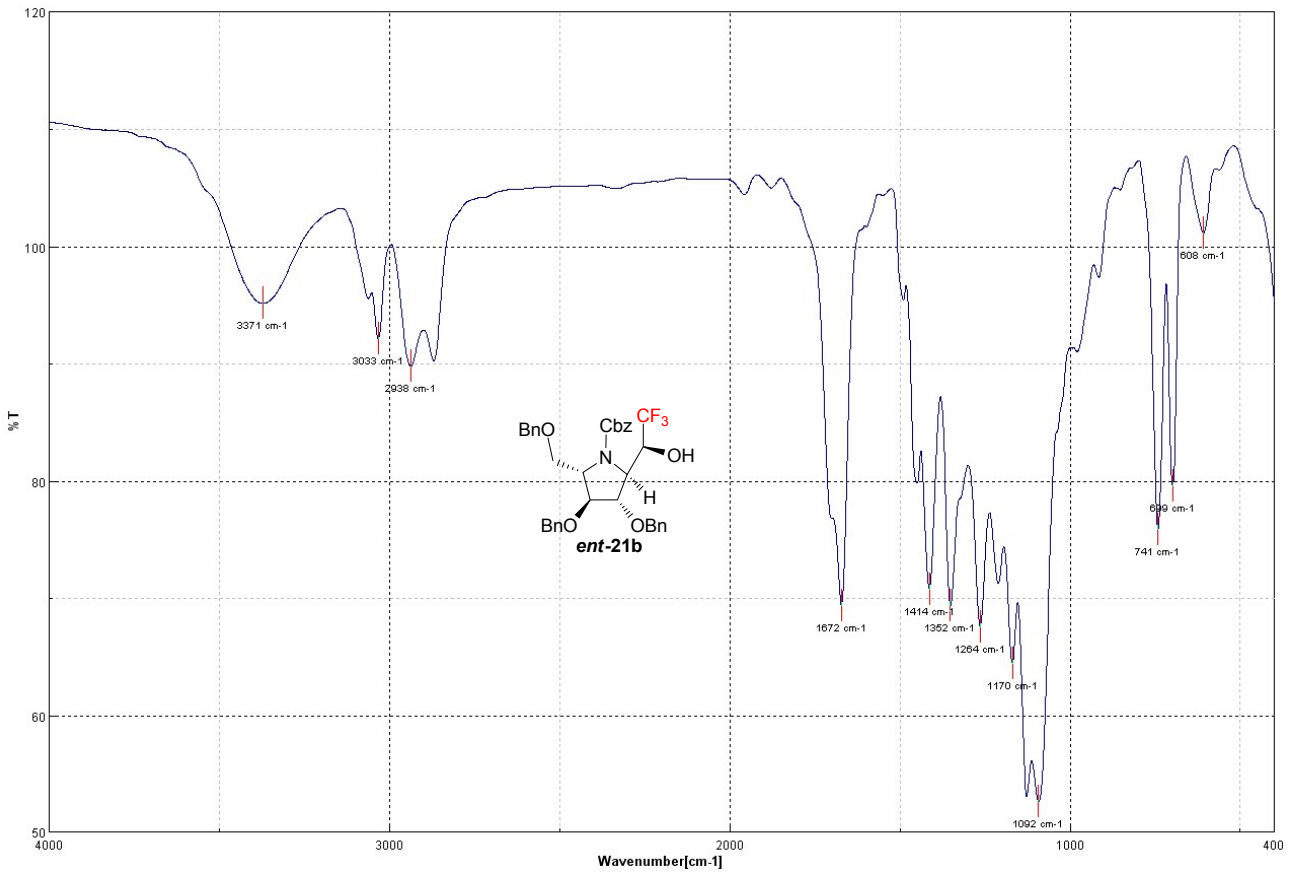



**Compound 9a:**

4.785  
4.600  
4.414  
4.394  
4.372  
4.081  
4.056  
4.033  
3.909  
3.867  
3.846  
3.825  
3.813  
3.802  
3.572  
3.563

NAME lyx4-240a  
EXPNO 20  
PROCNO 1  
Date\_ 20110301  
Time 17.26  
INSTRUM spect  
PROBHD 5 mm DUL 13C-1  
PULPROG zg30  
TD 65536  
SOLVENT D2O  
NS 3  
DS 0  
SWH 8992.806 Hz  
FIDRES 0.137219 Hz  
AQ 3.6438515 sec  
RG 128  
DW 55.600 usec  
DE 8.00 usec  
TE 295.6 K  
D1 1.0000000 sec  
TD0 1

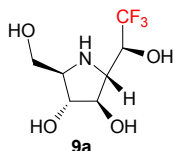

===== CHANNEL f1 =====  
NUC1 1H  
P1 10.80 usec  
PL1 3.00 dB  
SFO1 300.1324010 MHz  
SI 32768  
SF 300.1299535 MHz  
WDW EM  
SSB 0  
LB 0.30 Hz  
GB 0  
PC 1.00

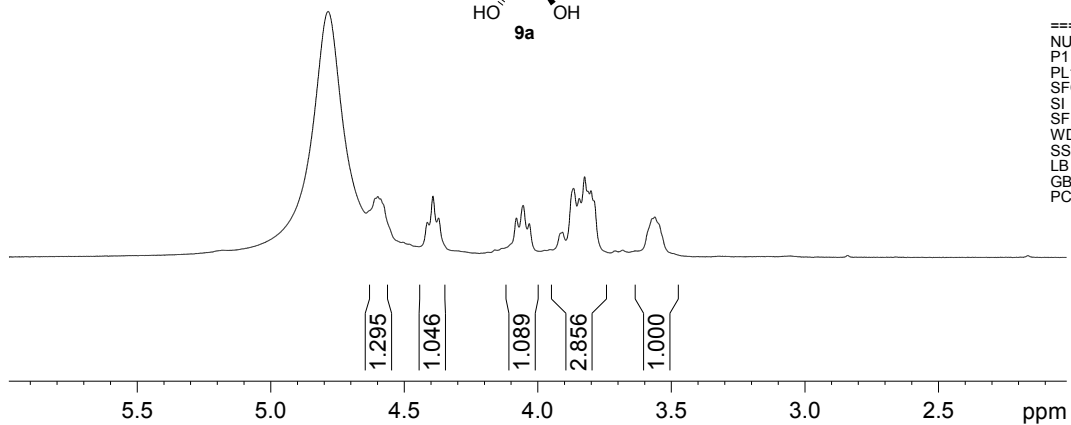

125.440  
121.695

74.421  
73.360  
67.635  
67.209  
66.784  
66.366  
62.812  
59.582  
57.072

lyx-240a-C13

NAME lyx-2016  
EXPNO 46  
PROCNO 1

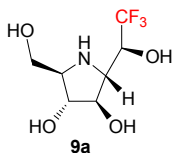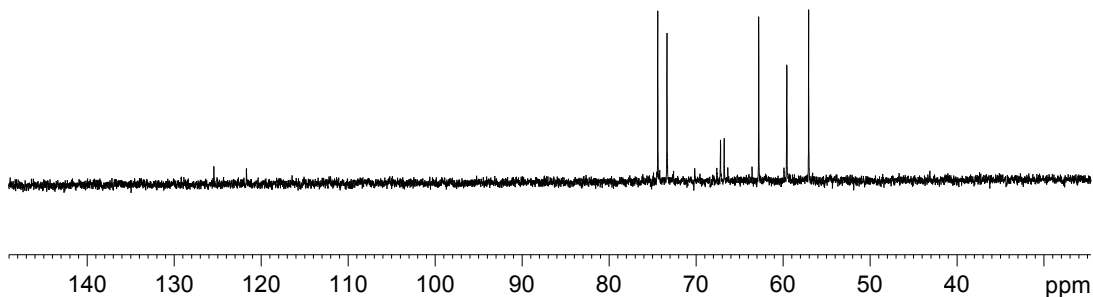

-76.403  
-76.413

NAME 19F  
EXPNO 110318  
PROCNO 1

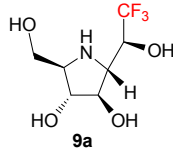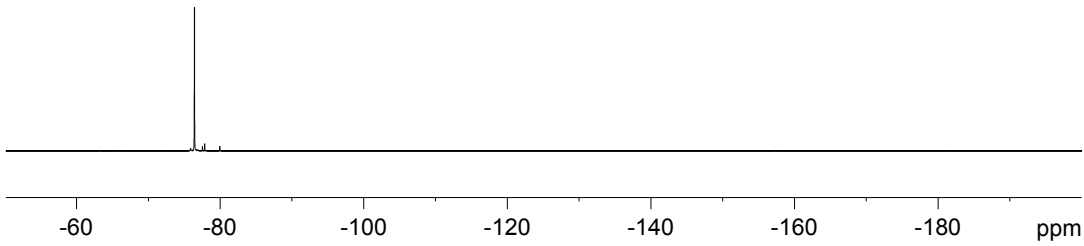

Compound 9b:

4.787  
4.511  
4.489  
4.196  
4.170  
4.142  
4.114  
4.086  
4.060  
3.925  
3.882  
3.838  
3.824  
3.719  
3.691  
3.528  
3.516  
3.502

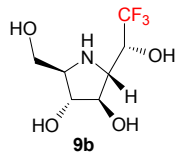

NAME lyx4-240b  
EXPNO 10  
PROCNO 1  
Date\_ 20110301  
Time 9.24  
INSTRUM spect  
PROBHD 5 mm DUL 13C-1  
PULPROG zg30  
TD 65536  
SOLVENT D2O  
NS 5  
DS 0  
SWH 8992.806 Hz  
FIDRES 0.137219 Hz  
AQ 3.6438515 sec  
RG 128  
DW 55.600 usec  
DE 8.00 usec  
TE 294.1 K  
D1 1.00000000 sec  
TD0 1

===== CHANNEL f1 =====  
NUC1 1H  
P1 10.80 usec  
PL1 3.00 dB  
SFO1 300.1324010 MHz  
SI 32768  
SF 300.1299574 MHz  
WDW EM  
SSB 0  
LB 0.30 Hz  
GB 0  
PC 1.00

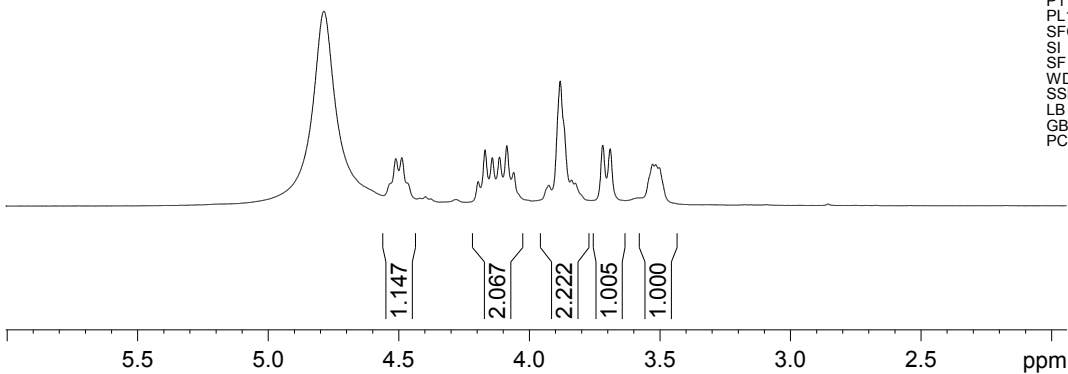



-77.765  
-77.781

NAME  
EXPNO 19F  
PROCNO 90318  
1

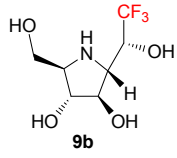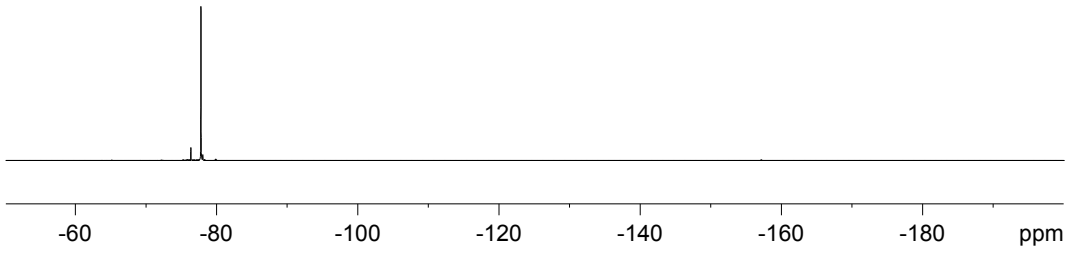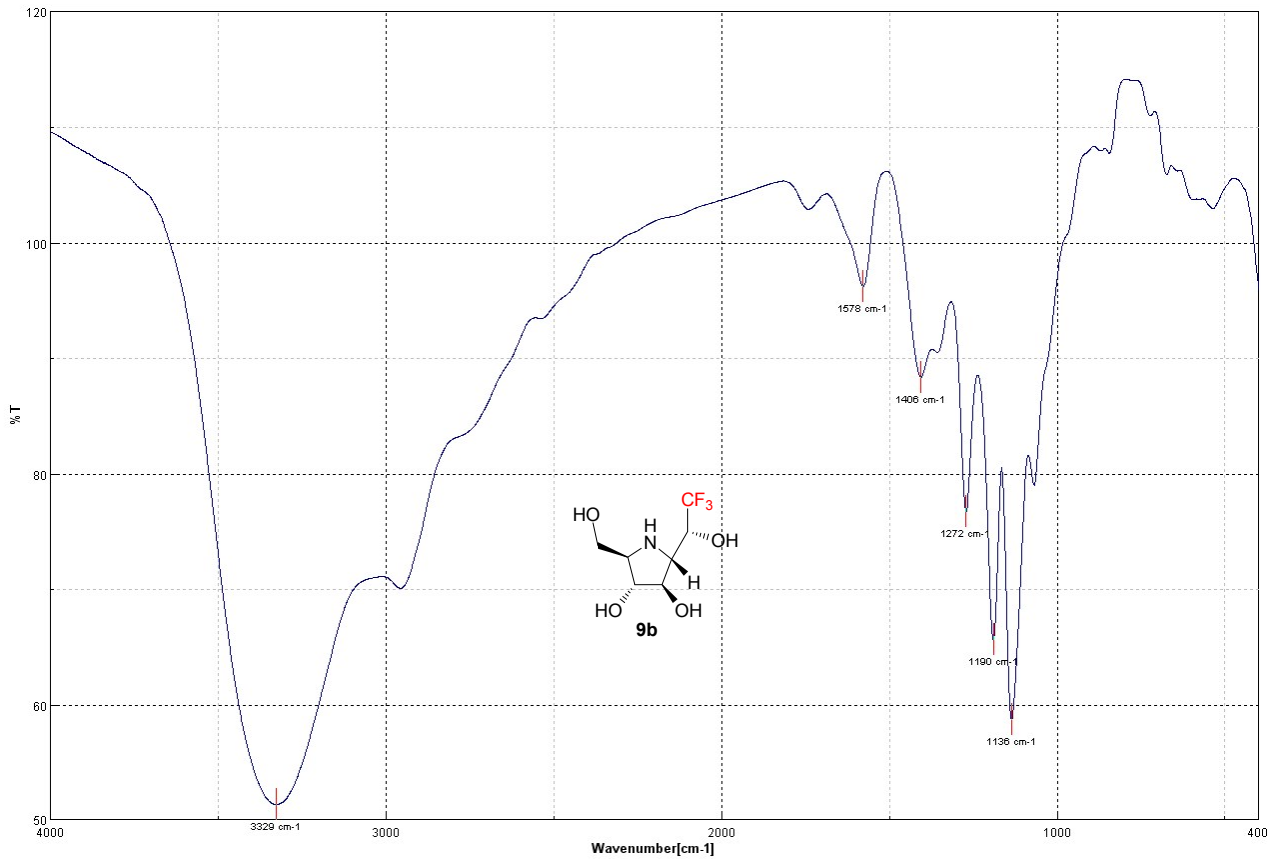

Compound *ent-9a*:

—76.359

NAME 19F  
EXPNO 100318  
PROCNO 1

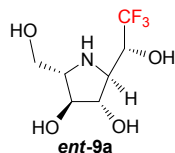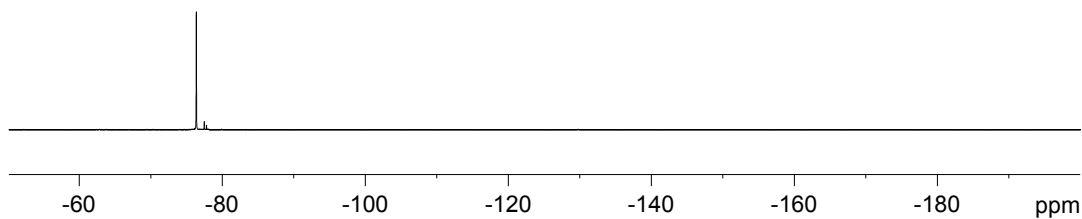

4.789  
4.654  
4.632  
4.619  
4.609  
4.596  
4.573  
4.433  
4.410  
4.388  
4.101  
4.078  
4.072  
4.049  
3.936  
3.925  
3.893  
3.882  
3.863  
3.844  
3.831  
3.820  
3.807  
3.610  
3.593  
3.581  
3.564  
3.551

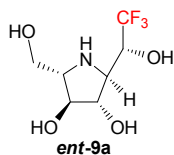

NAME lyx4-242a  
EXPNO 10  
PROCNO 1  
Date\_ 20110302  
Time 15.34  
INSTRUM spect  
PROBHD 5 mm DUL 13C-1  
PULPROG zg30  
TD 65536  
SOLVENT D2O  
NS 2  
DS 0  
SWH 8992.806 Hz  
FIDRES 0.137219 Hz  
AQ 3.6438515 sec  
RG 128  
DW 55.600 usec  
DE 8.00 usec  
TE 295.8 K  
D1 1.00000000 sec  
TD0 1

==== CHANNEL f1 =====  
NUC1 1H  
P1 10.80 usec  
PL1 3.00 dB  
SFO1 300.1324010 MHz  
SI 32768  
SF 300.1299666 MHz  
WDW EM  
SSB 0  
LB 0.30 Hz  
GB 0  
PC 1.00

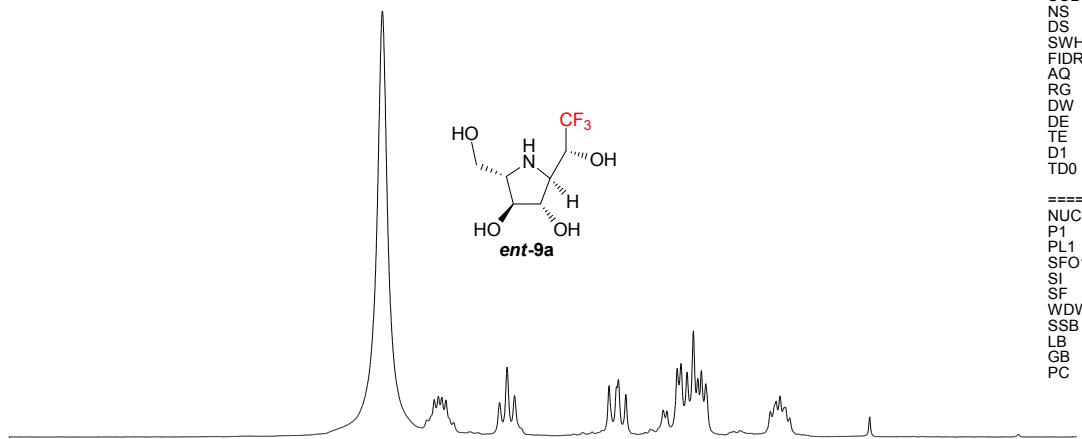

1.190  
1.027  
1.044  
3.074  
1.000

125.37  
121.63

74.33  
73.27  
70.10  
67.54  
67.12  
66.69  
66.26  
62.73  
59.50  
56.99

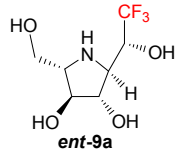

NAME lyx4-242a  
EXPNO 11  
PROCNO 1  
Date\_ 20110302  
Time\_ 15.36  
INSTRUM spect  
PROBHD 5 mm DUL 13C-1  
PULPROG zgpg30  
TD 65536  
SOLVENT D2O  
NS 177  
DS 4  
SWH 17985.611 Hz  
FIDRES 0.274439 Hz  
AQ 1.8219508 sec  
RG 14596.5  
DW 27.800 usec  
DE 8.00 usec  
TE 295.9 K  
D1 2.00000000 sec  
D11 0.03000000 sec  
TD0 1

===== CHANNEL f1 =====  
NUC1 13C  
P1 12.50 usec  
PL1 2.00 dB  
SFO1 75.4752953 MHz

===== CHANNEL f2 =====  
CPDPRG2 waltz16  
NUC2 1H  
PCPD2 100.00 usec  
PL2 3.00 dB  
PL12 22.33 dB  
PL13 23.00 dB  
SFO2 300.1312005 MHz  
SI 32768  
SF 75.4677490 MHz  
WDW EM  
SSB 0  
LB 1.00 Hz  
GB 0  
PC 1.40

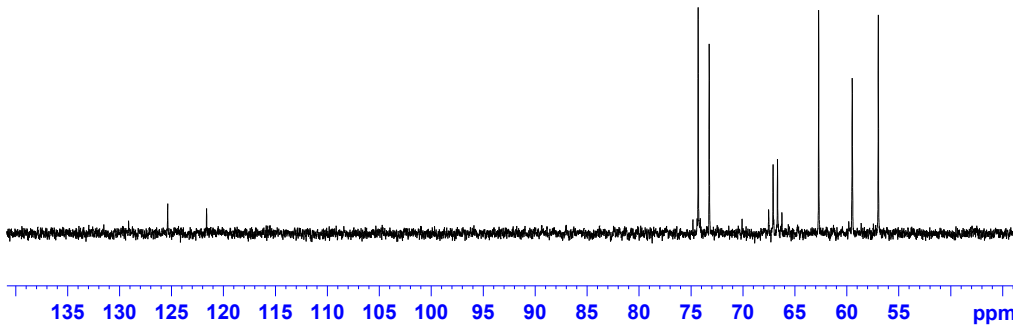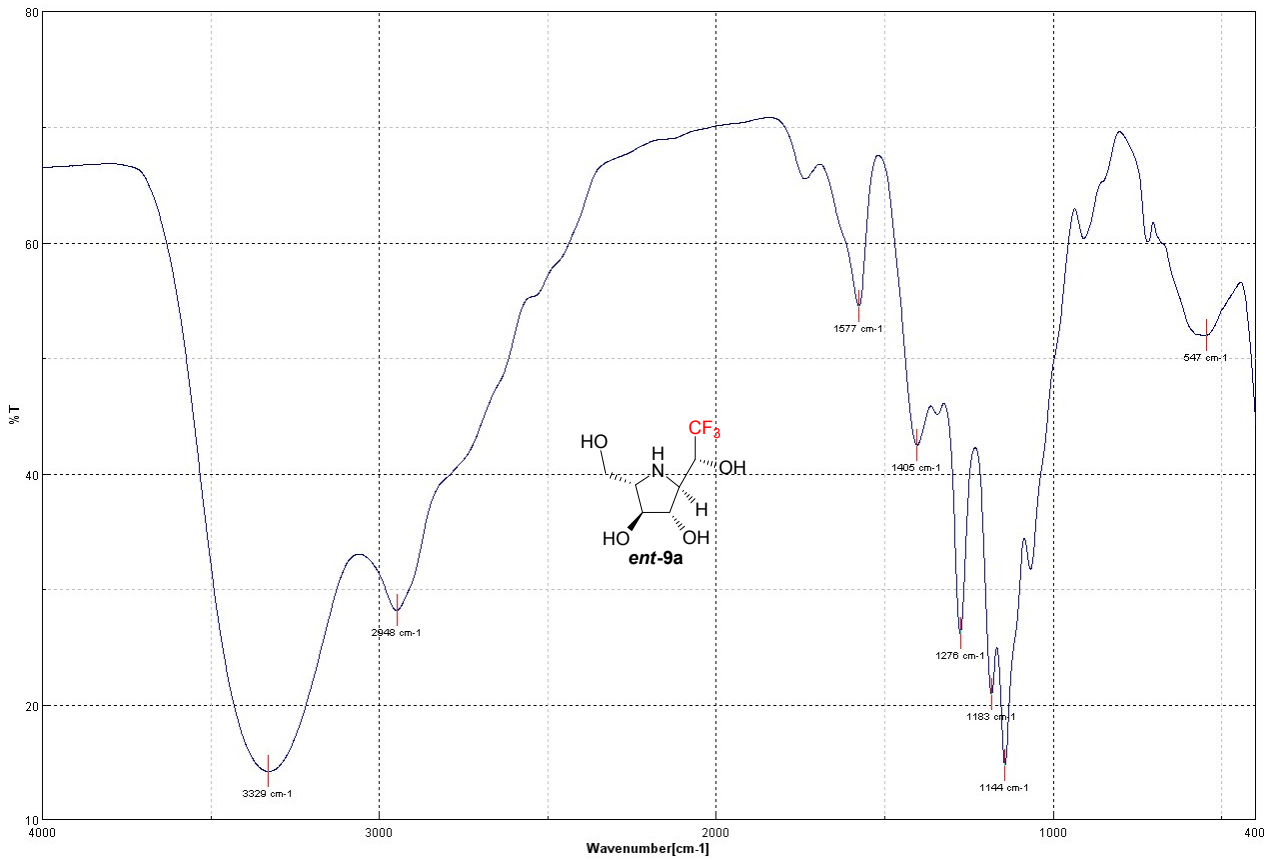

Compound *ent-9b*:

-77.822  
-77.837

NAME 19F  
EXPNO 40318  
PROCNO 1

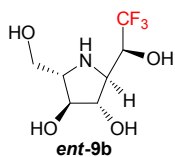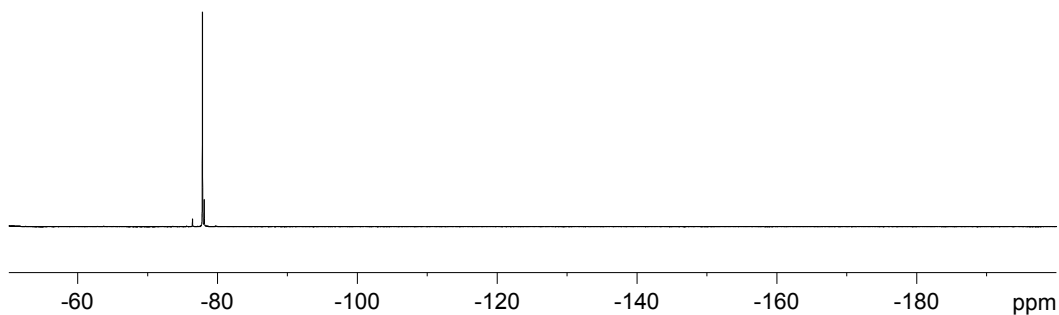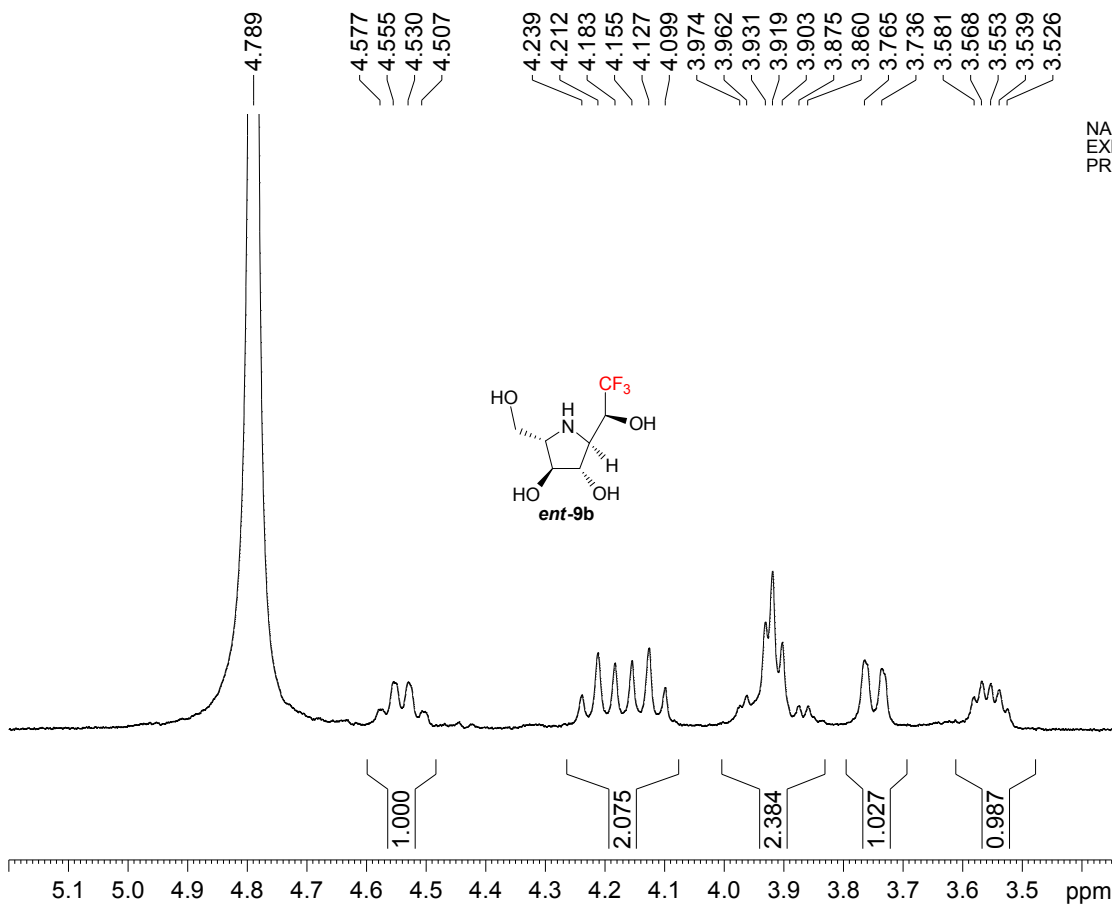

lyx-242b

NAME lyx-2016  
EXPNO 44  
PROCNO 1

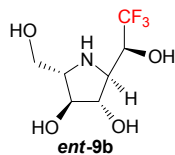

129.578  
125.842  
122.106  
118.370

74.187  
72.591  
65.646  
65.216  
64.791  
64.365  
62.604  
58.702  
57.331

lyx-242b-C13

NAME lyx-2016  
EXPNO 42  
PROCNO 1

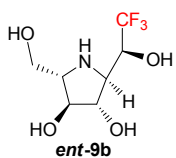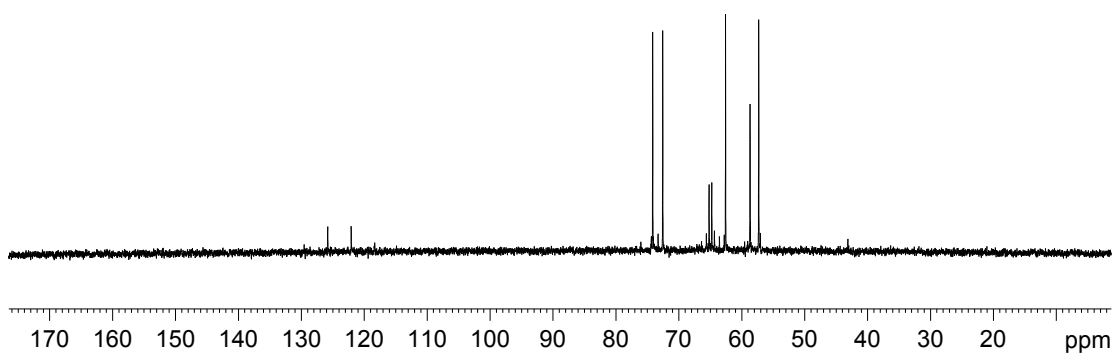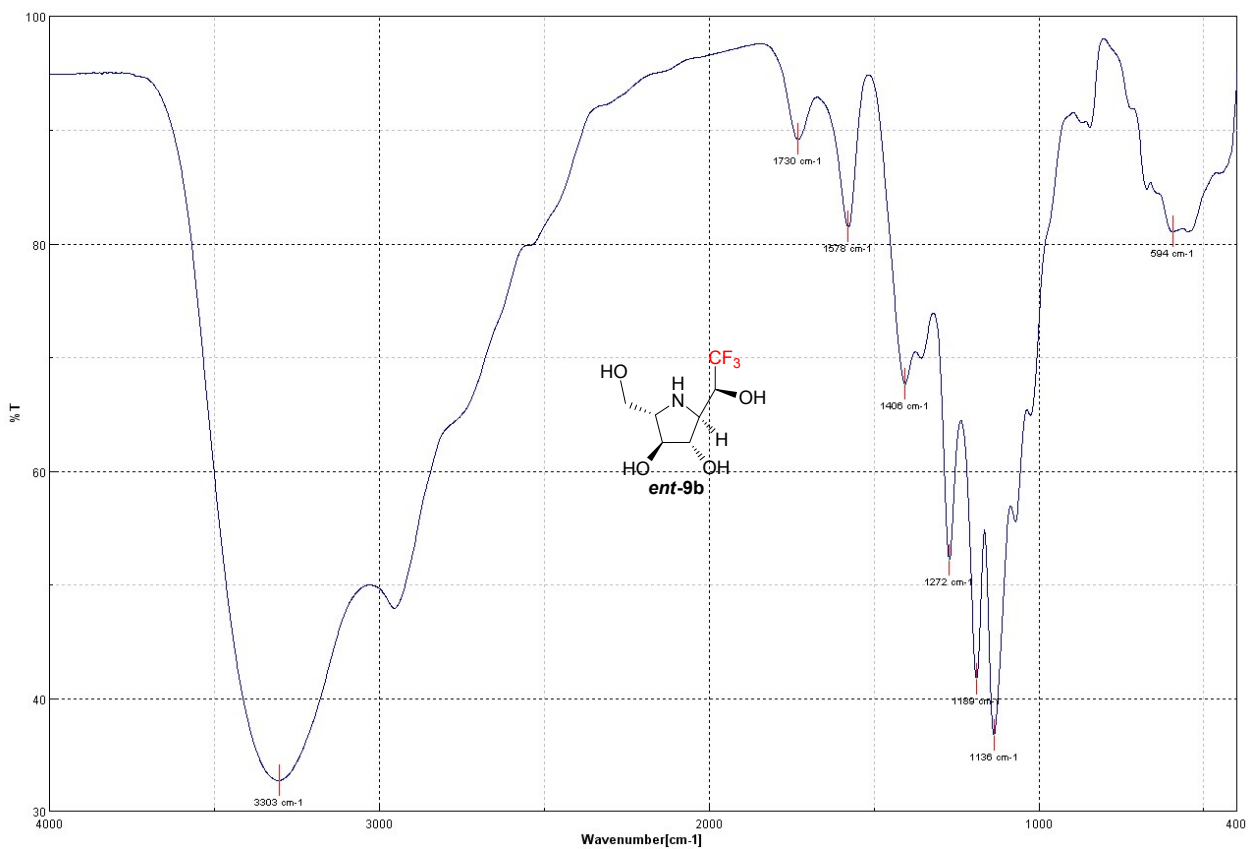



**Compound 22:**

7.426  
7.414  
7.410  
7.407  
7.401  
7.396  
7.379  
7.374  
7.370  
7.364  
7.358  
7.347  
7.334  
7.317  
7.315  
7.304  
4.660  
4.648  
4.641  
4.628  
4.607  
4.571  
4.551  
4.529  
4.509  
4.339  
4.334  
4.329  
4.258  
4.254  
4.059  
4.052  
4.049  
4.043  
3.987  
3.982  
3.978  
3.639  
3.630

NAME lyx-243b  
EXPNO 117  
PROCNO 1  
Date\_ 20150820  
Time 21.51  
INSTRUM spect  
PROBHD 5 mm PATBO BB-  
PULPROG zg30  
TD 65536  
SOLVENT CDCl3  
NS 8  
DS 0  
SWH 15015.015 Hz  
FIDRES 0.229111 Hz  
AQ 2.1824322 sec  
RG 57  
DW 33.300 usec  
DE 6.50 usec  
TE 298.1 K  
D1 2.0000000 sec  
TD0 1

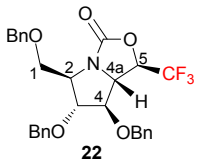

===== CHANNEL f1 =====  
NUC1 1H  
P1 12.00 usec  
PL1 -0.60 dB  
SFO1 600.1330006 MHz  
SI 65536  
SF 600.1300000 MHz  
WDW EM  
SSB 0  
LB 0.30 Hz  
GB 0  
PC 1.00

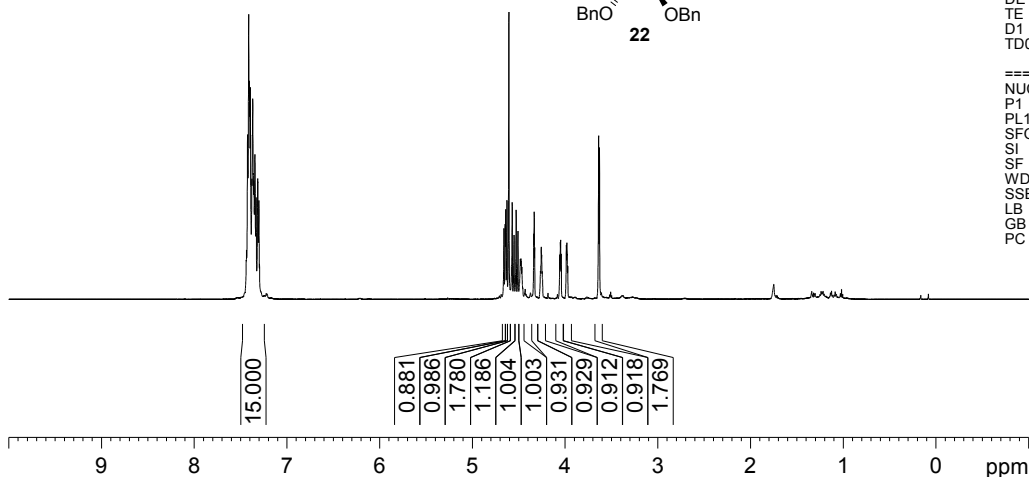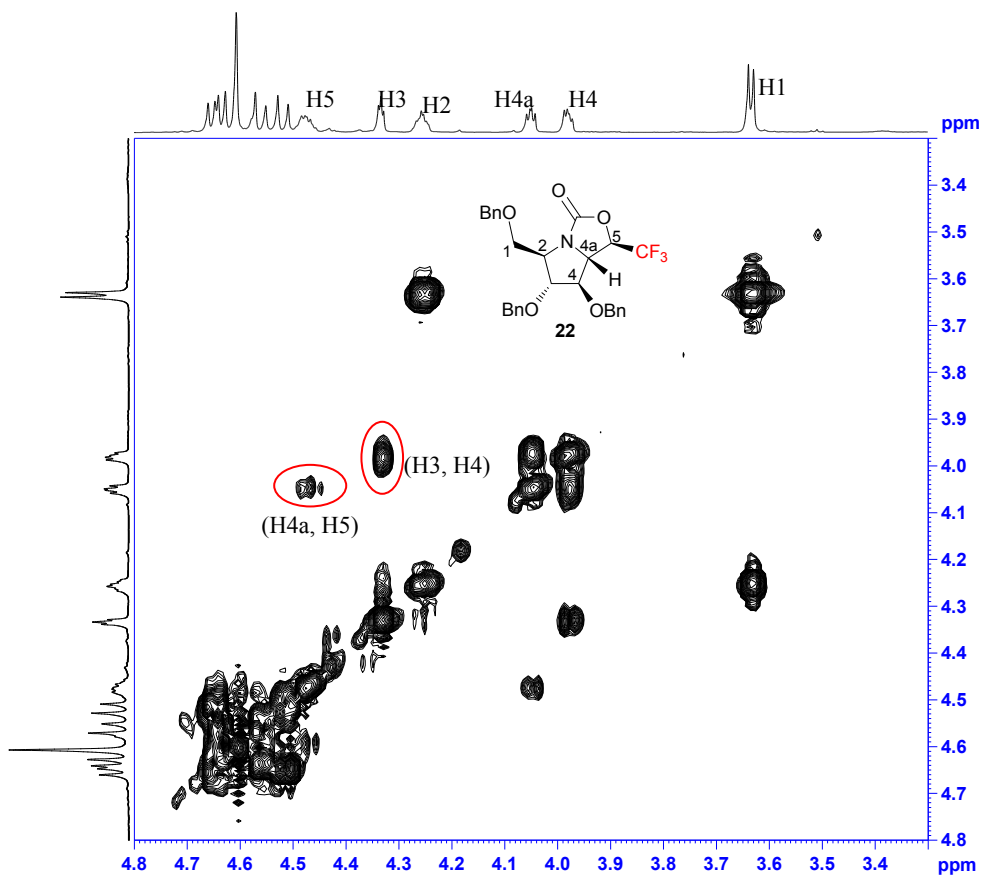

NAME lyx-243b  
EXPNO 118  
PROCNO 1  
Date\_ 20150820  
Time 21.53  
INSTRUM spect  
PROBHD 5 mm PATBO BB-  
PULPROG cosyppgf  
TD 2048  
SOLVENT CDCl3  
NS 16  
DS 8  
SWH 6009.615 Hz  
FIDRES 2.934382 Hz  
AQ 0.1705268 sec  
RG 35.9  
DW 83.200 usec  
DE 6.50 usec  
TE 298.1 K  
D0 0.00000300 sec  
D1 1.48689198 sec  
D13 0.00000400 sec  
D16 0.00020000 sec  
IND 0.00016640 sec

===== CHANNEL f1 =====  
NUC1 1H  
P1 12.00 usec  
PL1 -0.60 dB  
SFO1 600.1327006 MHz

===== GRADIENT CHANNEL =====  
GPNAM1 SINE.100  
GPZ1 10.00 %  
P16 1000.00 usec  
NDO 1  
TD 256  
SFO1 600.1327 MHz  
FIDRES 23.475035 Hz  
SW 10.014 ppm  
FMODE QF  
SI 1024  
SF 600.1300000 MHz  
WDW SINE  
SSB 0  
LB 0.00 Hz  
GB 0  
PC 1.00  
SI 1024  
MC2 QF  
SF 600.1300000 MHz  
WDW SINE  
SSB 0  
LB 0.00 Hz  
GB 0

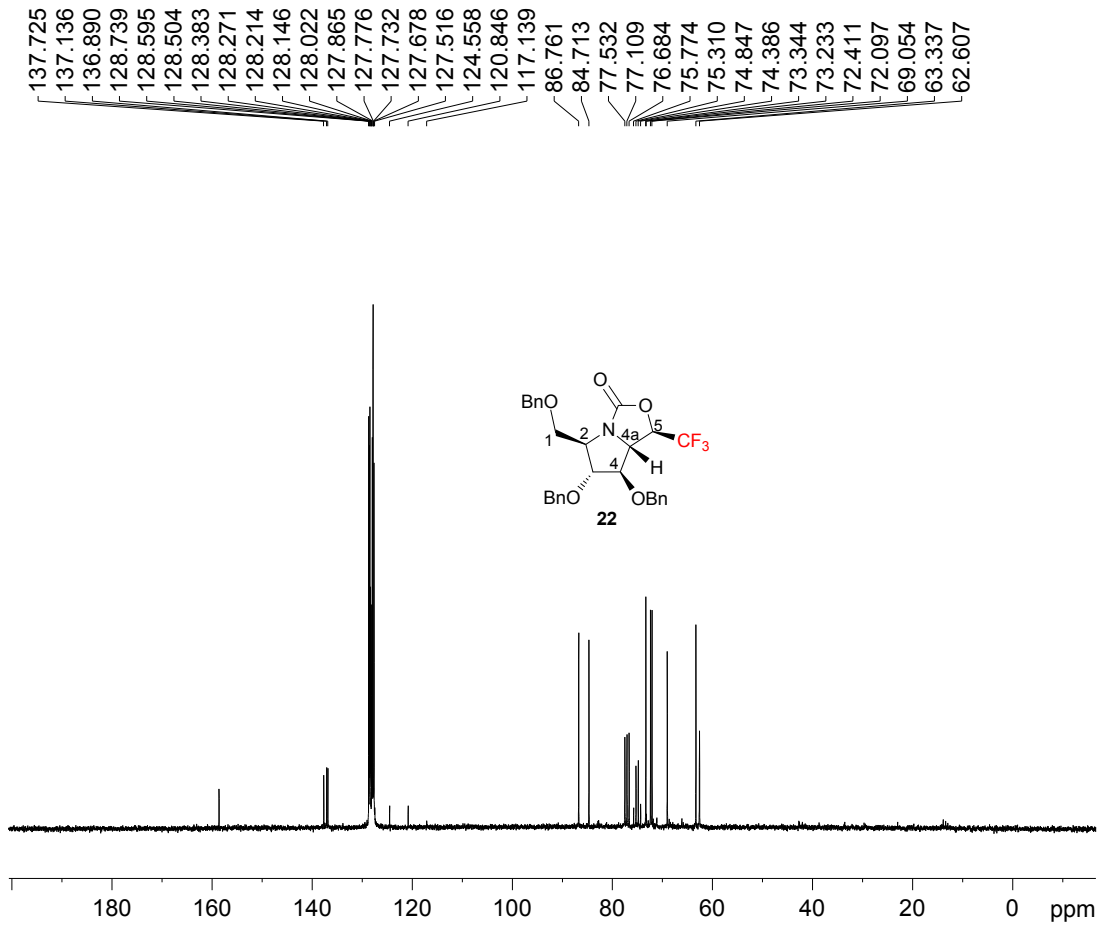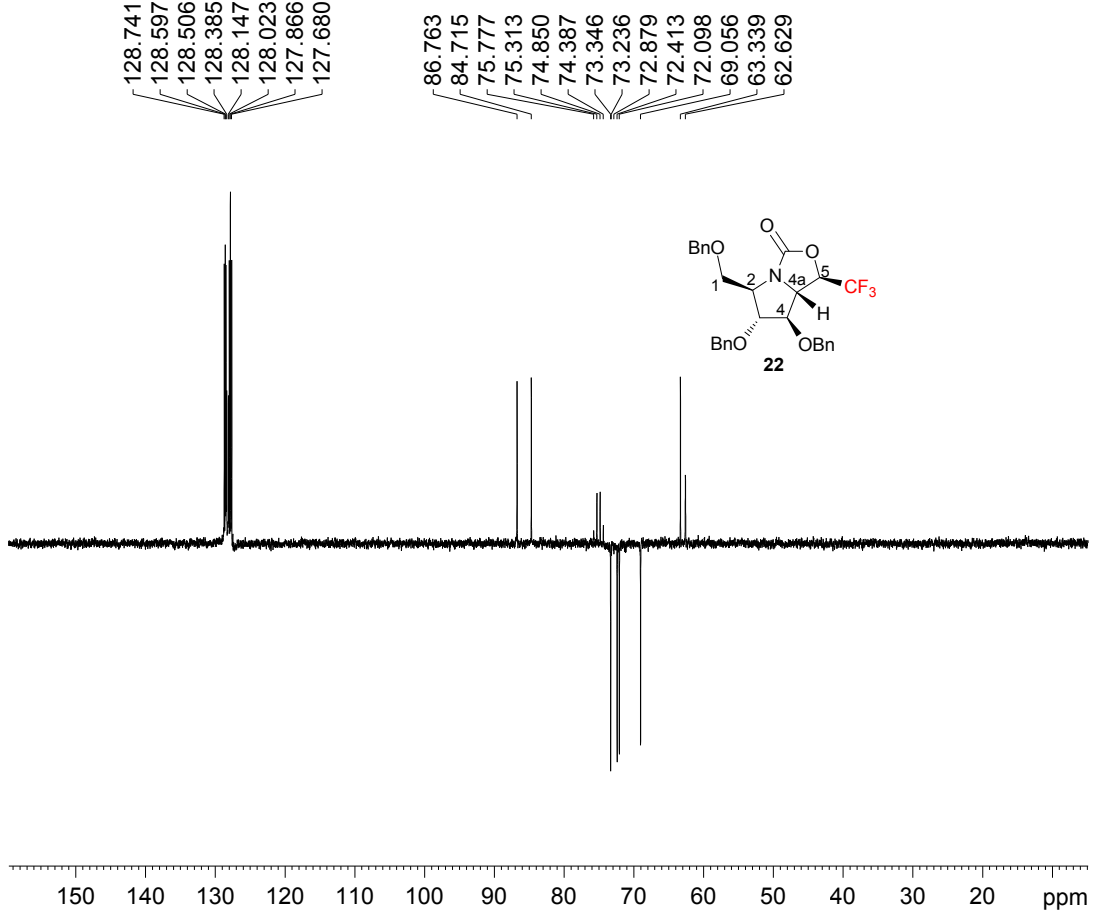

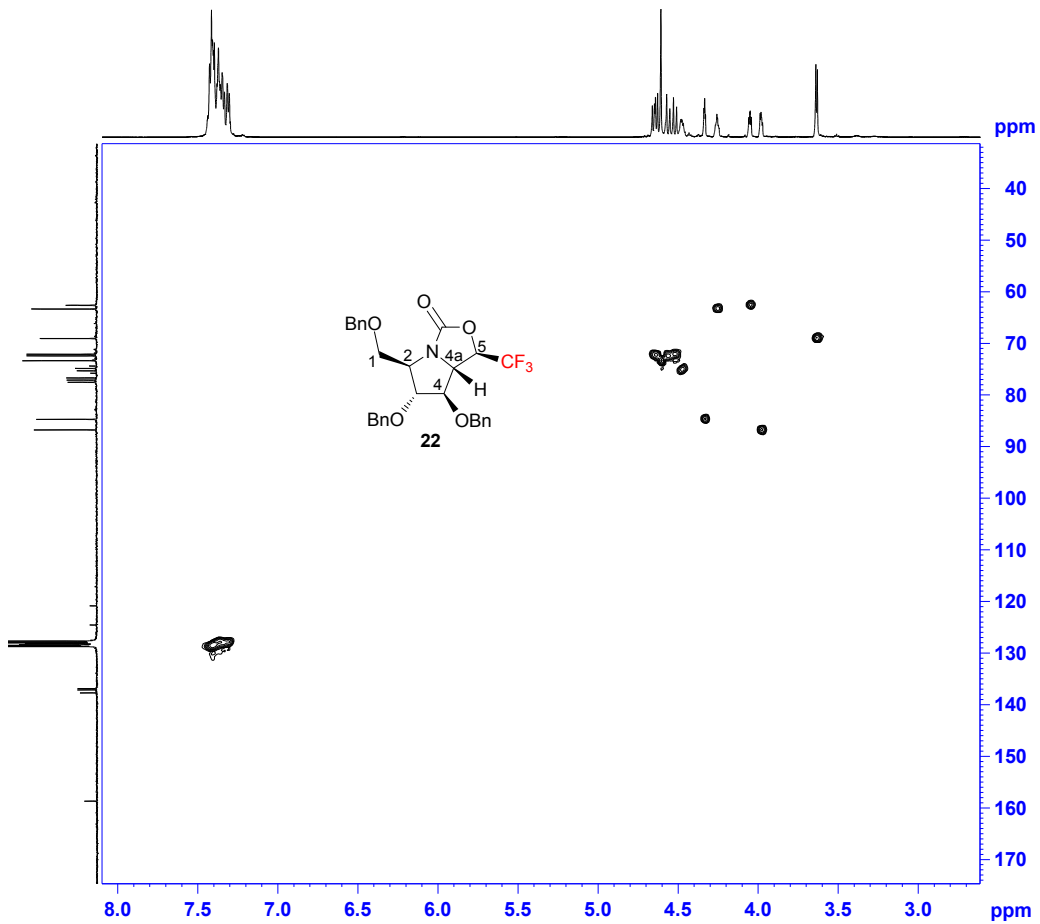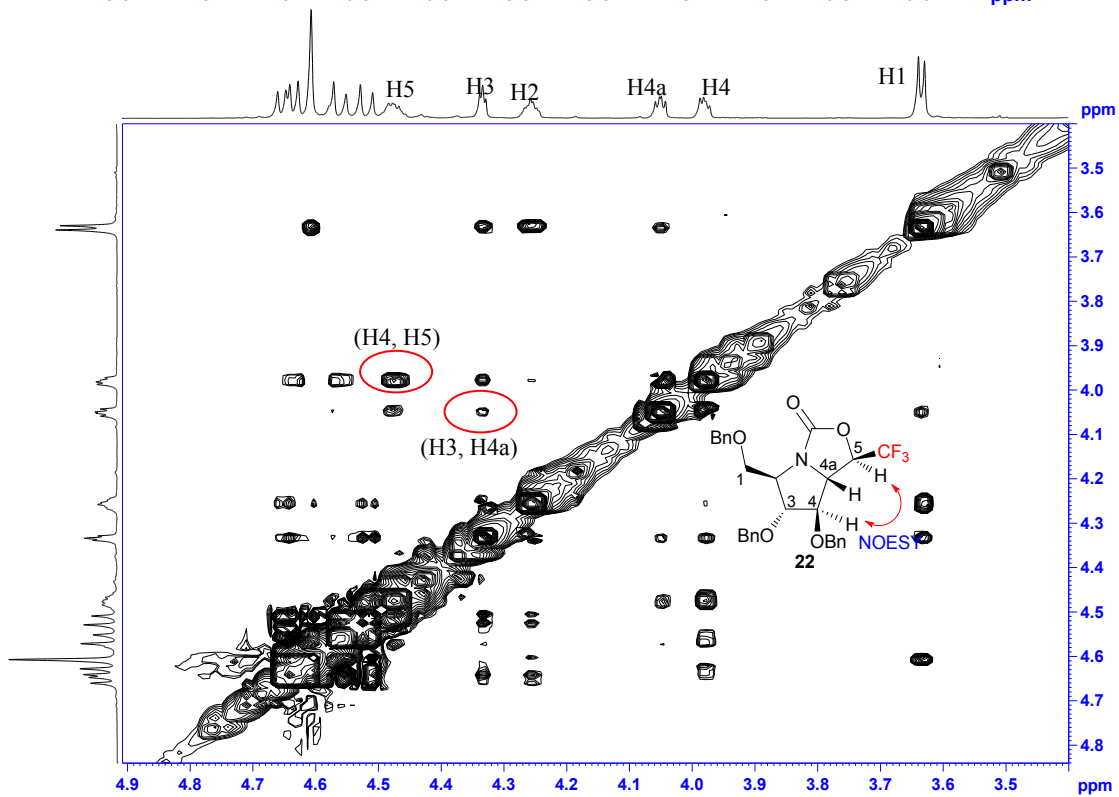

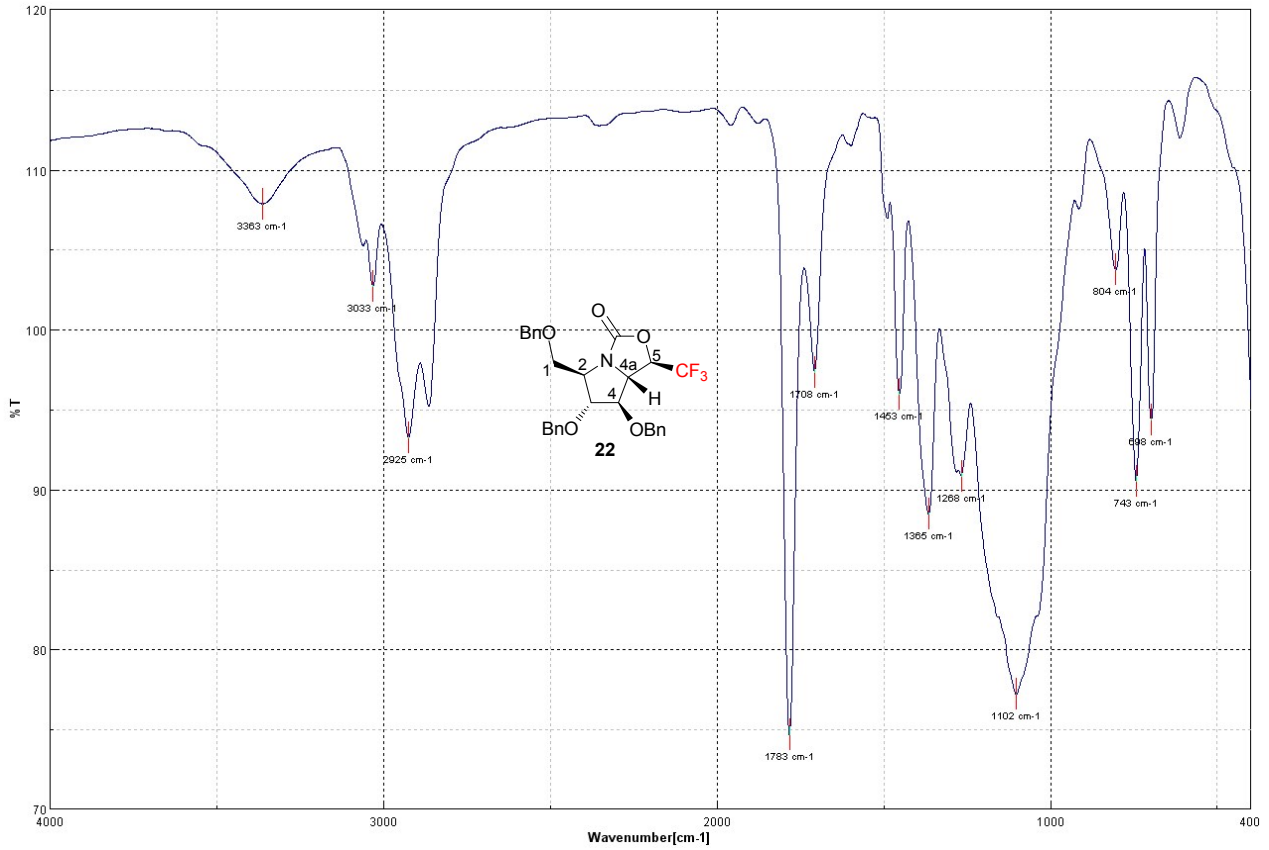

**Compound 25:**

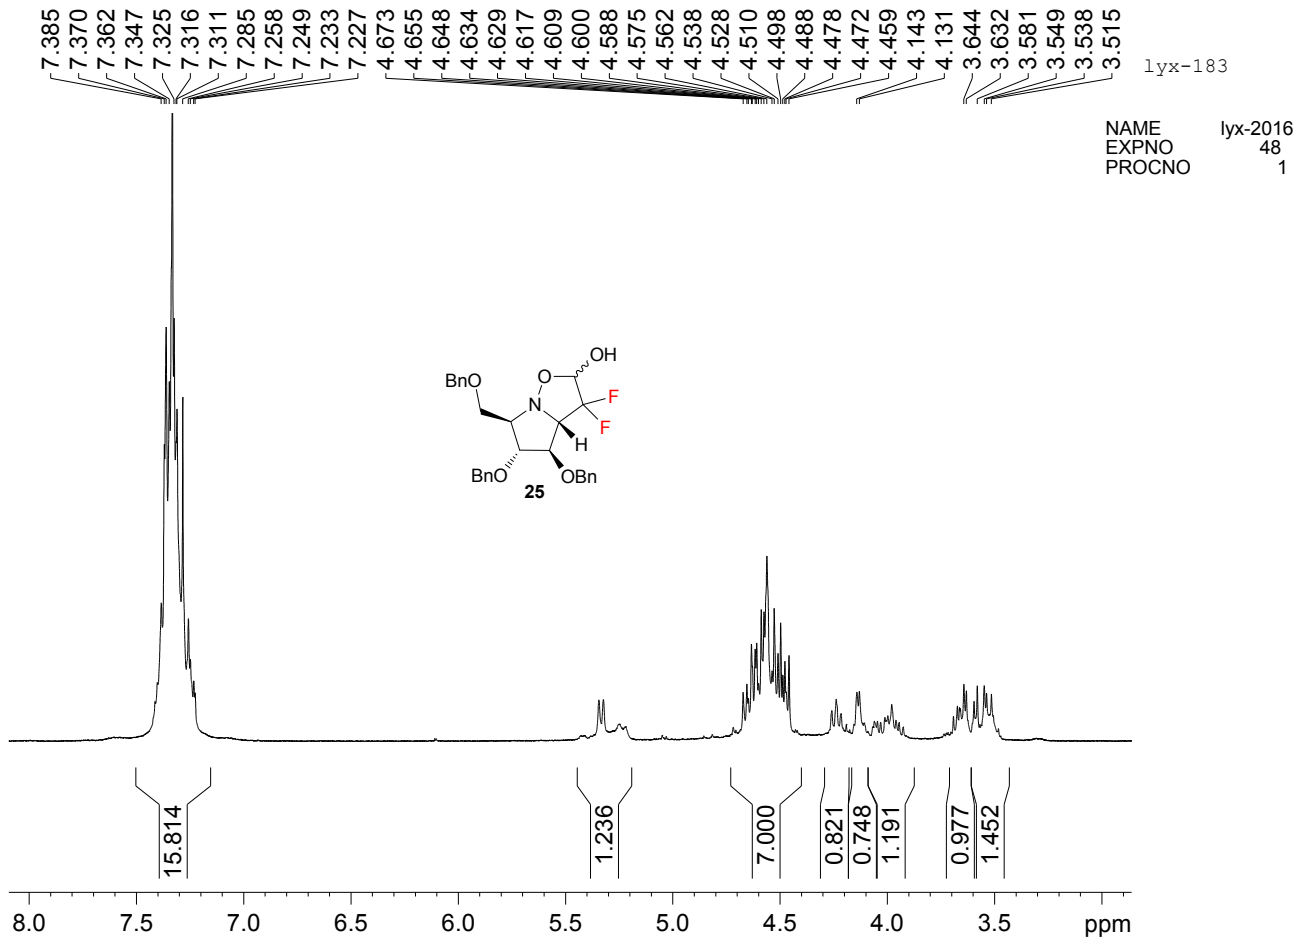

137.871  
 137.809  
 137.647  
 137.141  
 137.013  
 128.608  
 128.566  
 128.497  
 128.409  
 128.358  
 128.293  
 128.085  
 128.015  
 127.977  
 127.885  
 127.831  
 127.790  
 127.727  
 96.219  
 84.130  
 83.546  
 81.399  
 81.319  
 77.463  
 77.040  
 76.617  
 73.451  
 73.396  
 73.340  
 73.036  
 72.895  
 72.738  
 72.624  
 72.549  
 72.390  
 70.502  
 70.239  
 69.371  
 68.192

lyx-183-C13  
 NAME lyx-2016  
 EXPNO 49  
 PROCNO 1

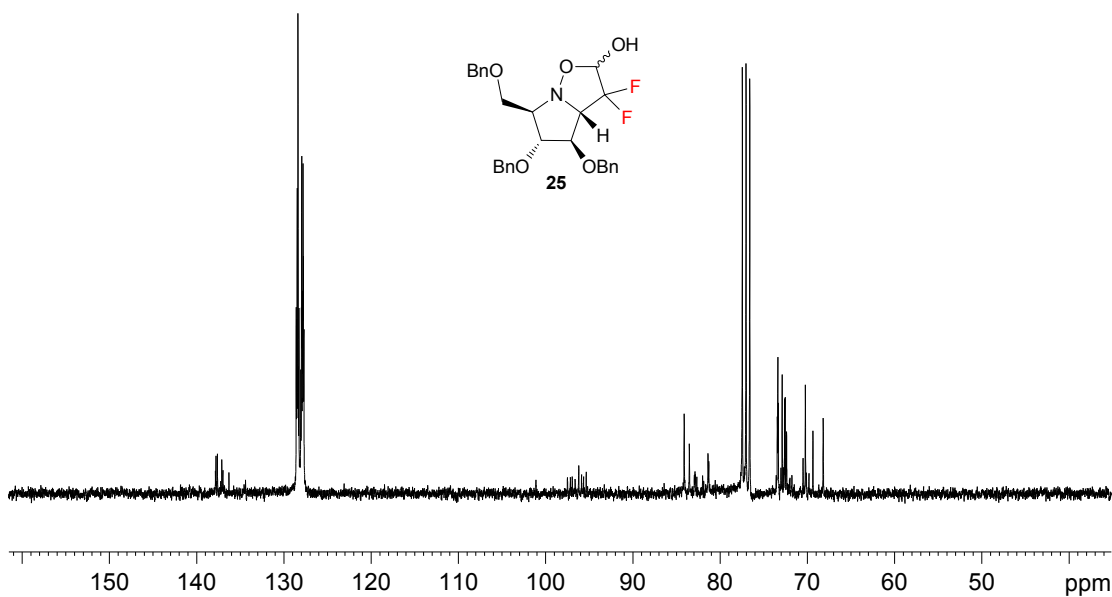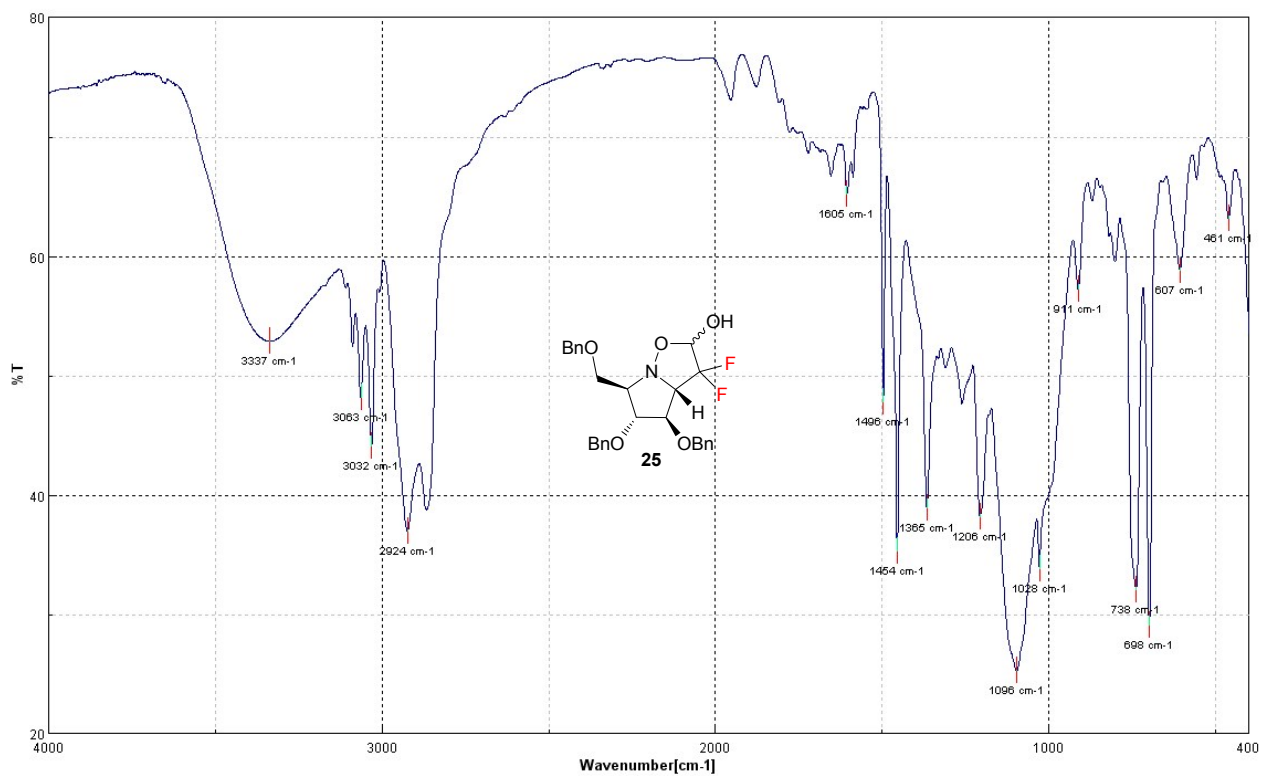

**Compound 26:**

5.275  
5.249  
5.222  
4.788  
4.304  
4.280  
4.256  
3.903  
3.876  
3.849  
3.787  
3.775  
3.747  
3.735  
3.713  
3.697  
3.673  
3.655  
3.625  
3.597  
3.574  
3.554  
3.530  
3.016  
3.003  
2.989  
2.974

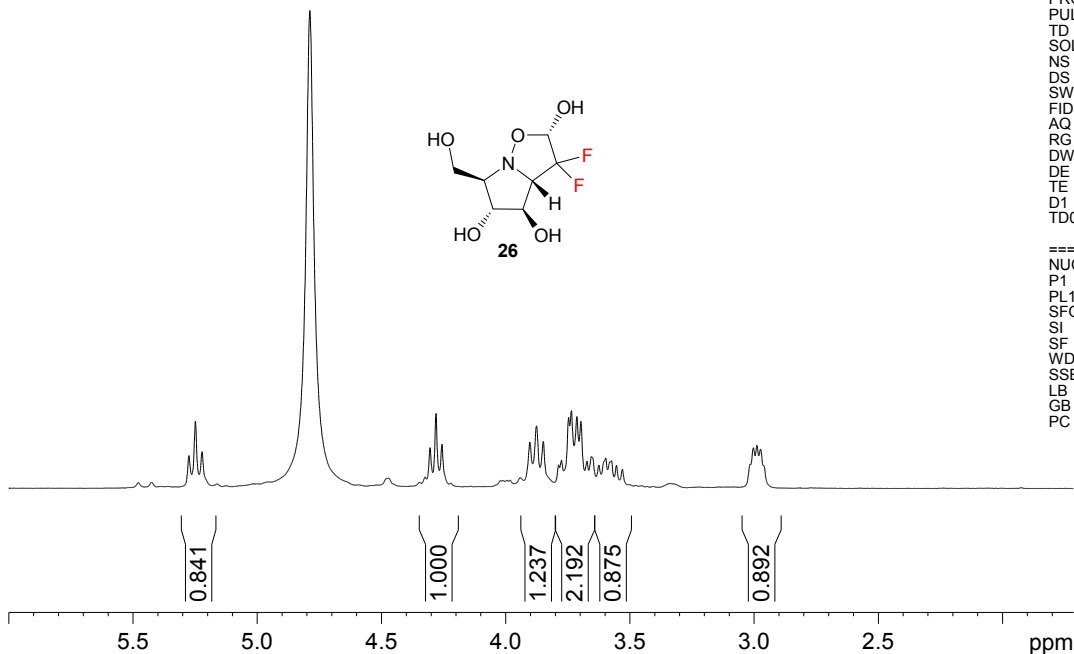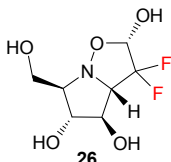

NAME lyx4-193  
EXPNO 10  
PROCNO 1  
Date\_ 20101009  
Time\_ 15.28  
INSTRUM spect  
PROBHD 5 mm DUL 13C-1  
PULPROG zg30  
TD 65536  
SOLVENT D2O  
NS 1  
DS 0  
SWH 8992.806 Hz  
FIDRES 0.137219 Hz  
AQ 3.6438515 sec  
RG 64  
DW 55.600 usec  
DE 8.00 usec  
TE 300.3 K  
D1 1.00000000 sec  
TD0 1

===== CHANNEL f1 =====  
NUC1 1H  
P1 10.80 usec  
PL1 3.00 dB  
SFO1 300.1324010 MHz  
SI 32768  
SF 300.1299692 MHz  
WDW EM  
SSB 0  
LB 0.30 Hz  
GB 0  
PC 1.00

123.37  
120.07  
116.77  
87.40  
86.03  
86.03  
76.84  
76.21  
61.71  
61.51  
60.58  
60.30  
59.95  
59.71

NAME lyx4-193  
EXPNO 11  
PROCNO 1  
Date\_ 20101009  
Time\_ 15.32  
INSTRUM spect  
PROBHD 5 mm DUL 13C-1  
PULPROG zgpg30  
TD 65536  
SOLVENT D2O  
NS 156  
DS 4  
SWH 17985.611 Hz  
FIDRES 0.274439 Hz  
AQ 1.8219508 sec  
RG 14596.5  
DW 27.800 usec  
DE 8.00 usec  
TE 300.7 K  
D1 2.00000000 sec  
D11 0.03000000 sec  
TD0 1

===== CHANNEL f1 =====  
NUC1 13C  
P1 12.50 usec  
PL1 2.00 dB  
SFO1 75.4752953 MHz

===== CHANNEL f2 =====  
CPDPRG2 waltz16  
NUC2 1H  
PCPD2 100.00 usec  
PL2 3.00 dB  
PL12 22.33 dB  
PL13 23.00 dB  
SFO2 300.1312005 MHz  
SI 32768  
SF 75.4677490 MHz  
WDW EM  
SSB 0  
LB 1.00 Hz  
GB 0  
PC 1.40

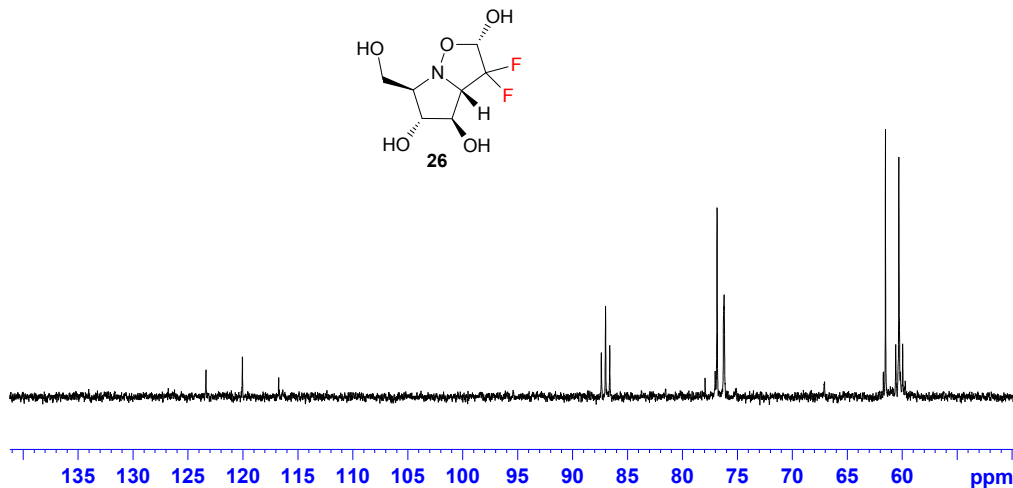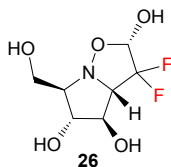

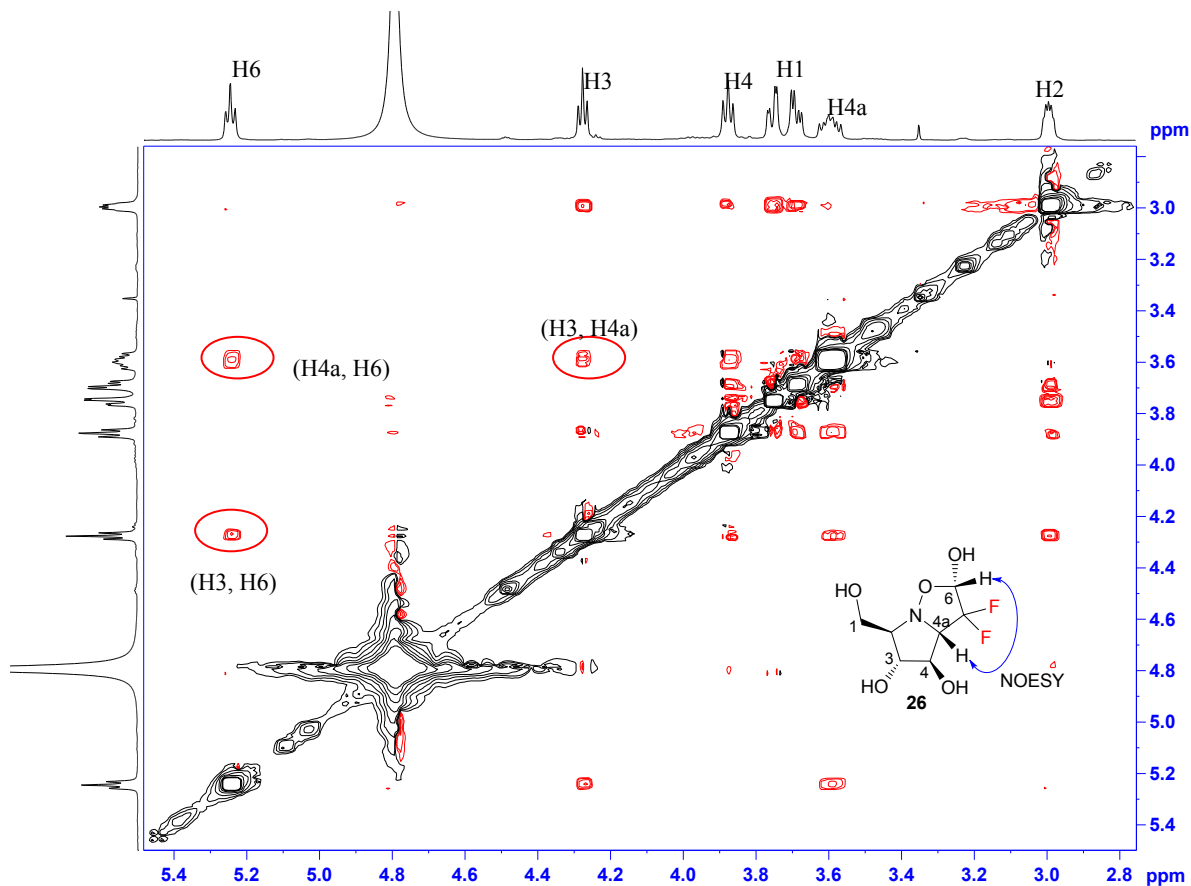

2#

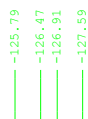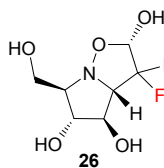

```

Current Data Parameters
NAME          19F
EXPNO         2
PROCNO        1

F2 - Acquisition Parameters
Date_         20110128
Time          8.19
INSTRUM      spect
PROBHD       5 mm BBO BB-1H
PULPROG      zgflgn
TD           32768
SOLVENT      CDC13
NS           16
DS           0
SWH          75187.969 Hz
FIDRES       2.294555 Hz
AQ           0.2179572 sec
RG           32
DW           6.650 usec
DE           6.00 usec
TE           673.2 K
D1           1.00000000 sec

===== CHANNEL f1 =====
NUC1          19F
P1            12.50 usec
PL1           0.00 dB
SFO1          376.4418792 MHz

F2 - Processing parameters
SI            65536
SF            376.4983540 MHz
WDW           EM
SSB           0
LB            5.00 Hz
GB            0
PC            0.10
  
```

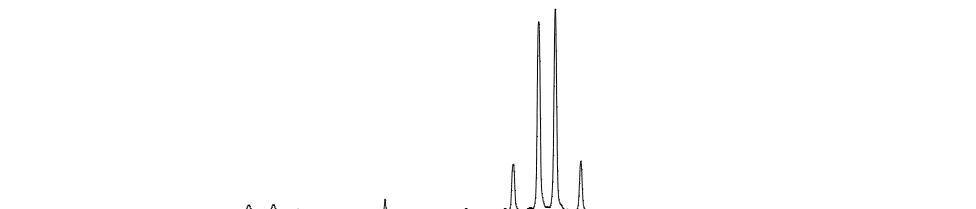

-114 -116 -118 -120 -122 -124 -126 -128 -130 -132 -134 -136 ppm

**Compound 27:**

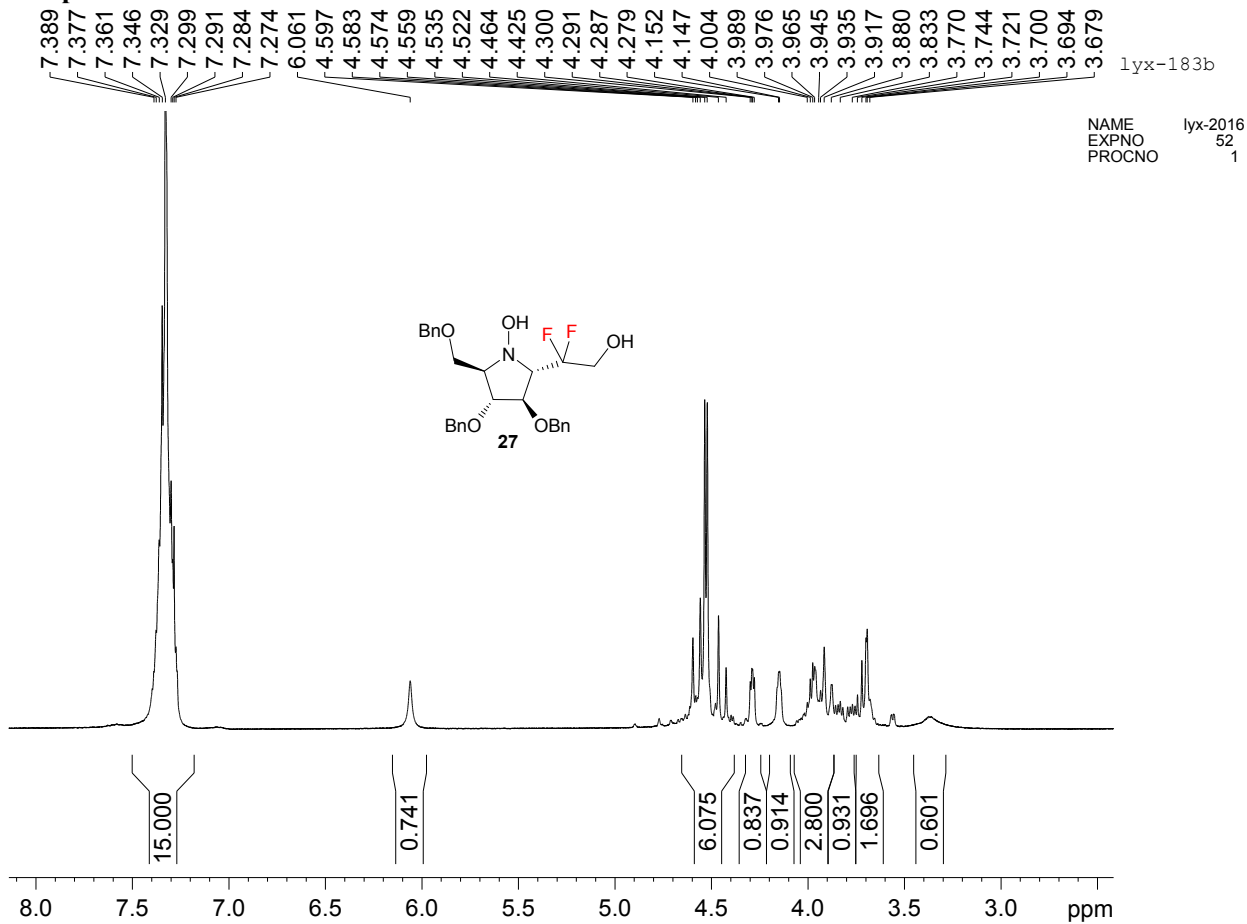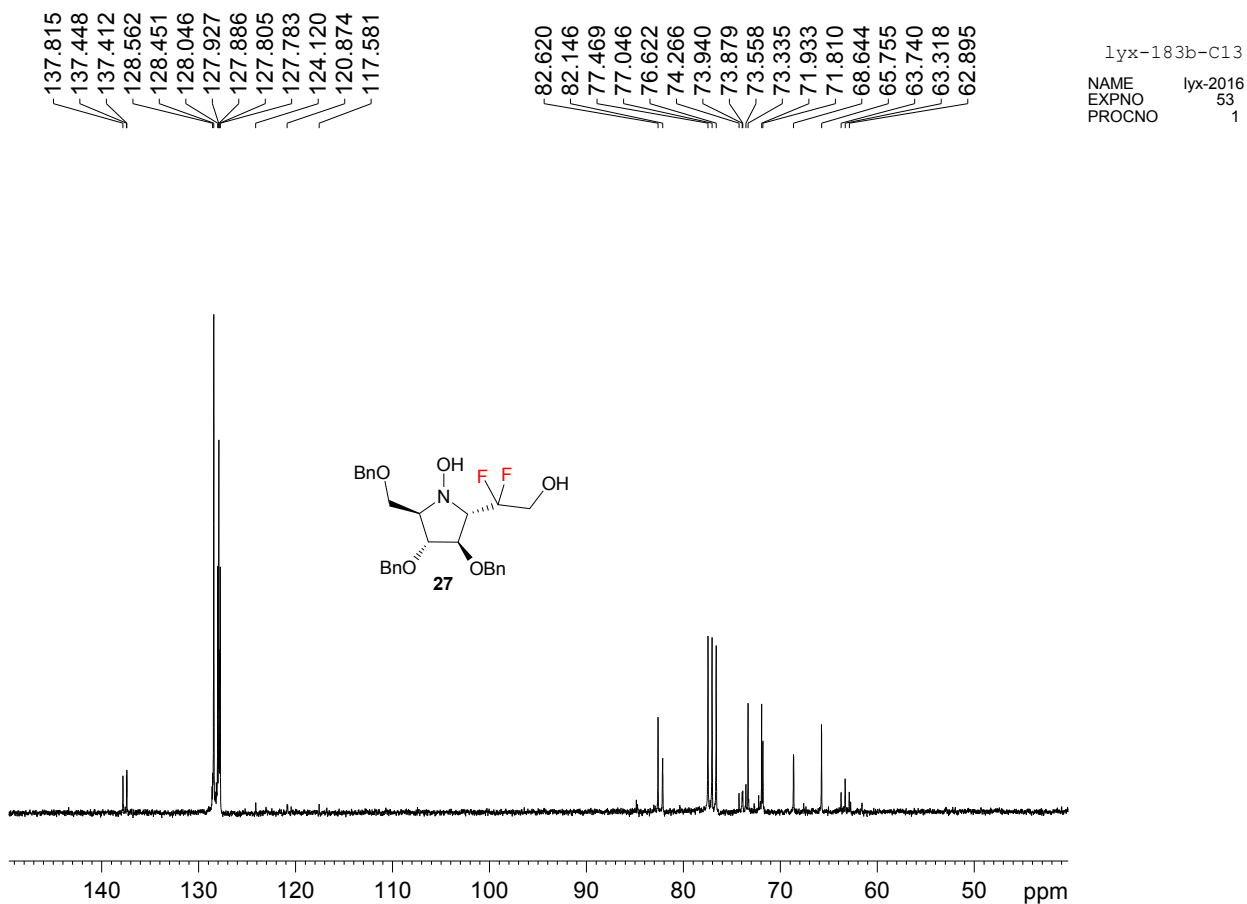



128.452  
128.049  
127.929  
127.888  
127.808  
127.784

82.621  
82.145  
74.265  
73.944  
73.879  
73.335  
71.934  
71.811  
68.631  
65.755  
63.740  
63.320  
62.897

x-183b-dept1

NAME lyx-2016  
EXPNO 54  
PROCNO 1

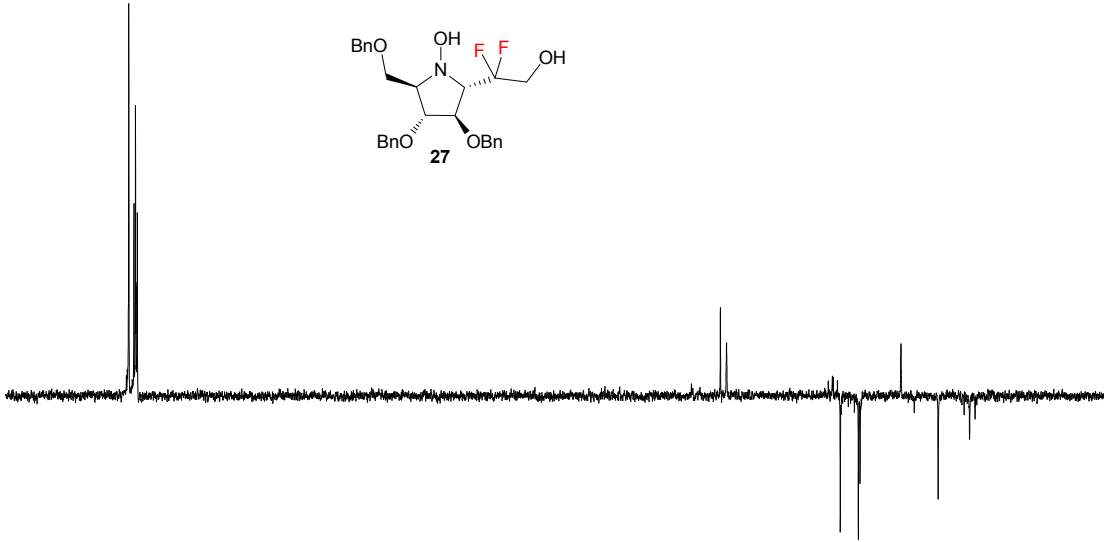

135 130 125 120 115 110 105 100 95 90 85 80 75 70 65 60 ppm

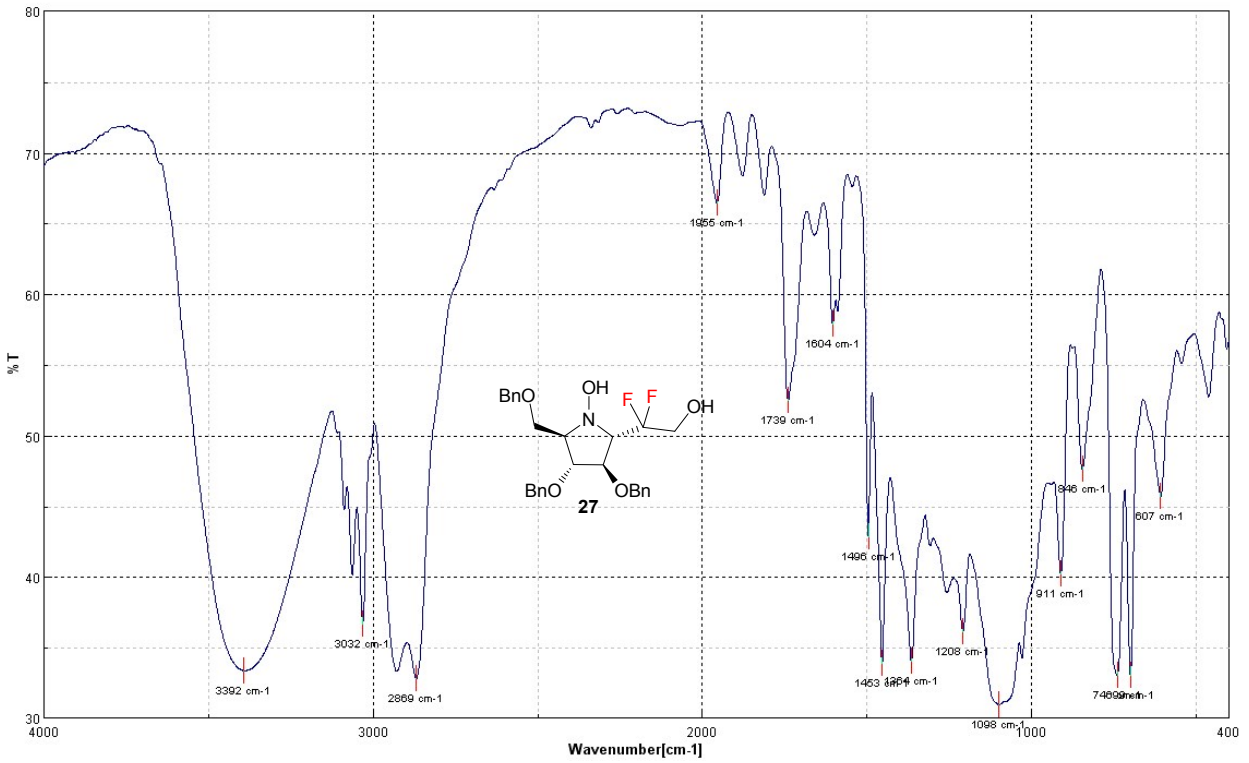

**Compound 10:**

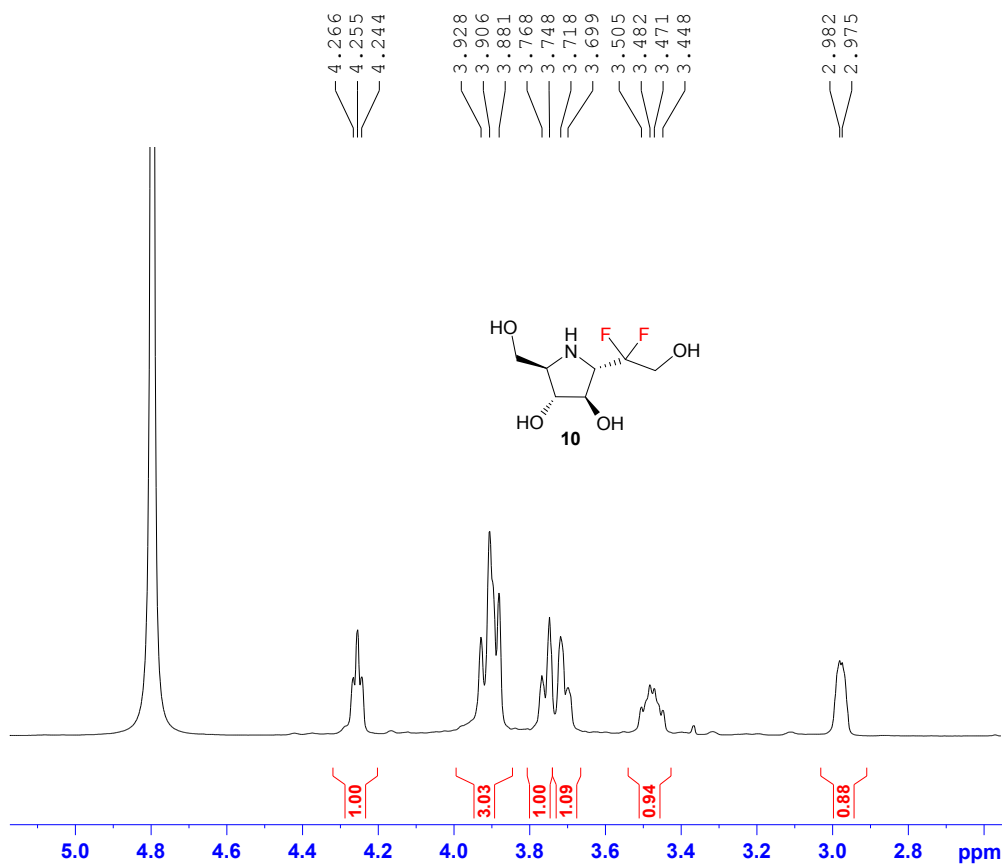

Current Data Parameters  
 NAME lyx-noe  
 EXPNO 50  
 PROCNO 1

F2 - Acquisition Parameters  
 Date\_ 20110114  
 Time\_ 9.17  
 INSTRUM spect  
 PROBHD 5 mm BBI 1H-BB  
 PULPROG zg30  
 TD 32768  
 SOLVENT D2O  
 NS 8  
 DS 0  
 SWH 17985.611 Hz  
 FIDRES 0.548877 Hz  
 AQ 0.9110004 sec  
 RG 90.5  
 DW 27.800 usec  
 DE 6.50 usec  
 TE 298.0 K  
 D1 2.00000000 sec  
 TD0 1

===== CHANNEL f1 =====  
 NUC1 1H  
 P1 11.80 usec  
 PL1 2.00 dB  
 PL1W 15.84893227 W  
 SFO1 600.1330006 MHz

F2 - Processing parameters  
 SI 16384  
 SF 600.1300000 MHz  
 WDW EM  
 SSB 0  
 LB 1.00 Hz  
 GB 0  
 PC 1.00

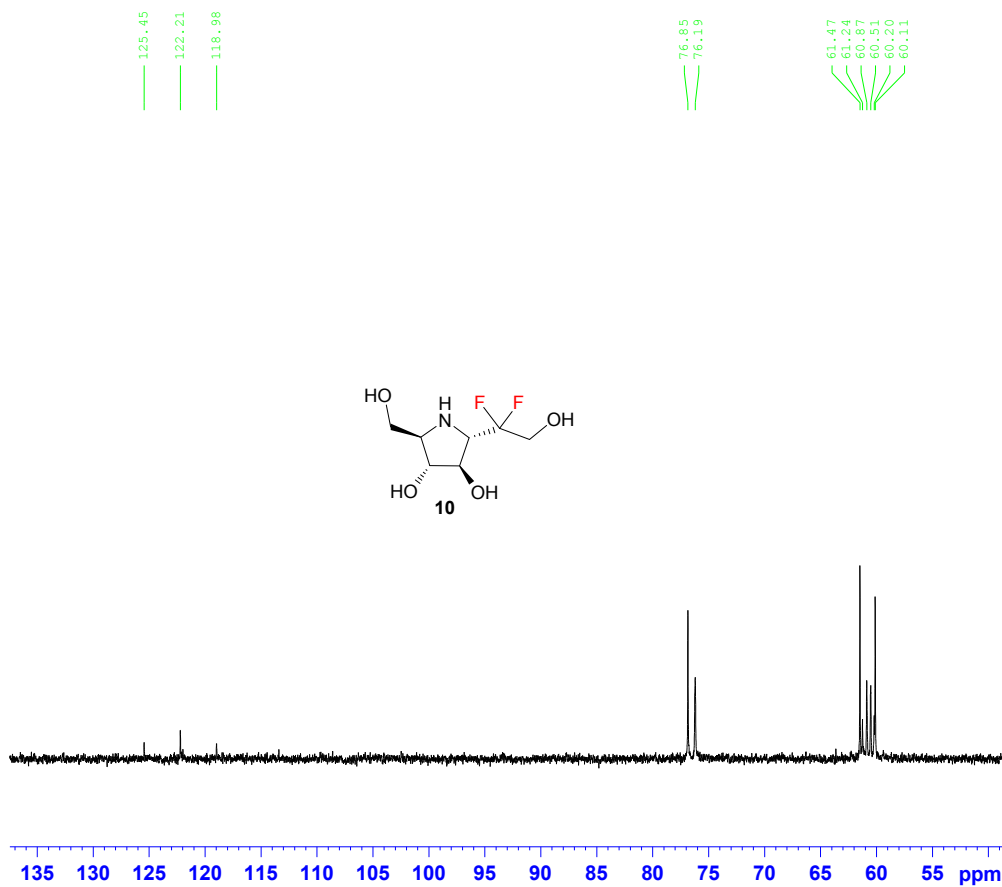

NAME lyx4-193b  
 EXPNO 11  
 PROCNO 1  
 Date\_ 20101027  
 Time\_ 17.09  
 INSTRUM spect  
 PROBHD 5 mm DUL 13C-1  
 PULPROG zgpg30  
 TD 65536  
 SOLVENT D2O  
 NS 40  
 DS 4  
 SWH 17985.611 Hz  
 FIDRES 0.274439 Hz  
 AQ 1.8219508 sec  
 RG 13004  
 DW 27.800 usec  
 DE 8.00 usec  
 TE 298.3 K  
 D1 2.00000000 sec  
 D11 0.03000000 sec  
 TD0 1

===== CHANNEL f1 =====  
 NUC1 13C  
 P1 12.50 usec  
 PL1 2.00 dB  
 SFO1 75.4752953 MHz

===== CHANNEL f2 =====  
 CPDPRG2 waltz16  
 NUC2 1H  
 PCPD2 100.00 usec  
 PL2 3.00 dB  
 PL12 22.33 dB  
 PL13 23.00 dB  
 SFO2 300.1312005 MHz  
 SI 32768  
 SF 75.4677490 MHz  
 WDW EM  
 SSB 0  
 LB 1.00 Hz  
 GB 0  
 PC 1.40

76.85  
76.20

61.48  
61.25  
60.87  
60.54  
60.20  
60.11

NAME lyx4-193b  
EXPNO 12  
PROCNO 1  
Date\_ 20101027  
Time\_ 17.12  
INSTRUM spect  
PROBHD 5 mm DUL 13C-1  
PULPROG dept135  
TD 65536  
SOLVENT D2O  
NS 17  
DS 4  
SWH 17985.611 Hz  
FIDRES 0.274439 Hz  
AQ 1.8219508 sec  
RG 16384  
DW 27.800 usec  
DE 8.00 usec  
TE 298.5 K  
CNST2 145.0000000  
D1 2.00000000 sec  
D2 0.00344828 sec  
D12 0.00002000 sec  
TD0 1

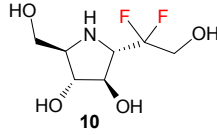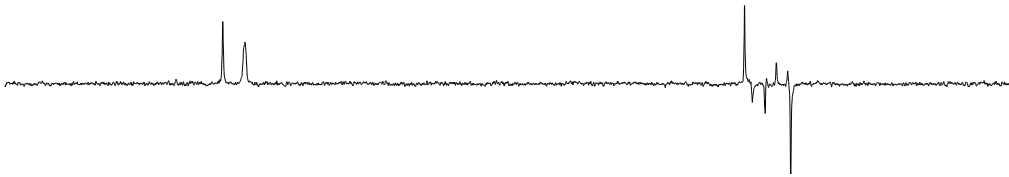

===== CHANNEL f1 =====  
NUC1 13C  
P1 12.50 usec  
P2 25.00 usec  
PL1 2.00 dB  
SFO1 75.4752953 MHz

===== CHANNEL f2 =====  
CPDPRG2 waltz16  
NUC2 1H  
P3 10.80 usec  
P4 21.60 usec  
PCPD2 100.00 usec  
PL2 3.00 dB  
PL12 22.33 dB  
SFO2 300.1312005 MHz  
SI 32768  
SF 75.4677490 MHz  
RDW EM  
SSB 0  
LB 1.00 Hz  
GB 0  
PC 1.40

82 80 78 76 74 72 70 68 66 64 62 60 58 56 ppm

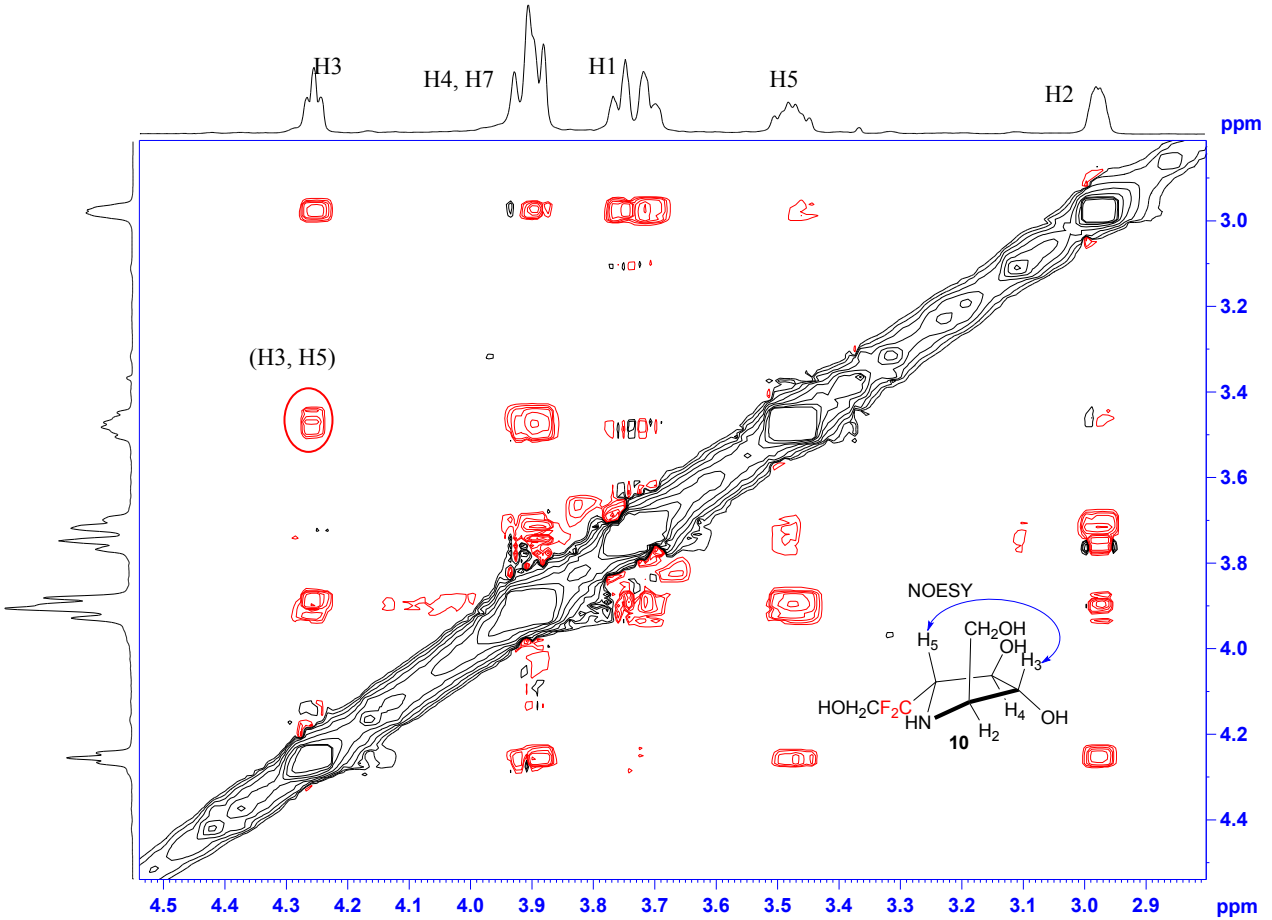

10#

-118.22  
-118.25  
-118.88  
-118.91  
-119.31  
-119.34  
-119.98  
-120.01

Current Data Parameters  
NAME 19F  
EXPNO 10  
PROCNO 1

F2 - Acquisition Parameters  
Date\_ 20110128  
Time\_ 8.29  
INSTRUM spect  
PROBHD 5 mm BBO BB-1H  
PULPROG zgflgn  
TD 32768  
SOLVENT CDCl3  
NS 16  
DS 0  
SWH 75187.969 Hz  
FIDRES 2.294555 Hz  
AQ 0.2179572 sec  
RG 32  
DW 6.650 usec  
DE 6.00 usec  
TE 673.2 K  
D1 1.00000000 sec

===== CHANNEL f1 =====  
NUC1 19F  
P1 12.50 usec  
PL1 0.00 dB  
SF01 376.4418792 MHz

F2 - Processing parameters  
SI 65536  
SF 376.4983540 MHz  
WDW EM  
SSB 0  
LB 5.00 Hz  
GB 0  
PC 0.10

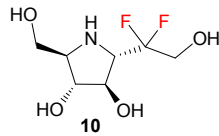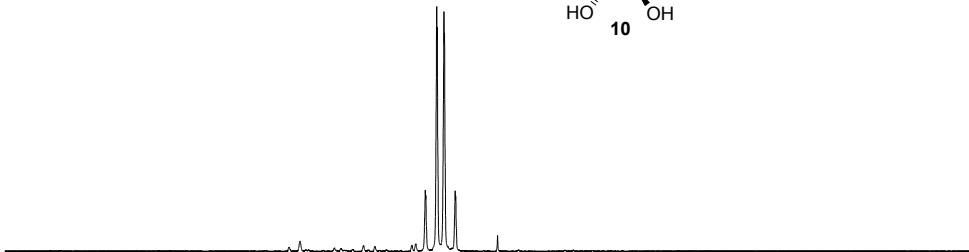

-95 -100 -105 -110 -115 -120 -125 -130 -135 -140 -145 ppm

Compound ent-27:

7.388  
7.377  
7.370  
7.357  
7.340  
7.327  
7.321  
7.298  
7.284  
7.273  
7.266  
5.725  
4.591  
4.552  
4.538  
4.524  
4.462  
4.423  
4.296  
4.287  
4.283  
4.274  
4.157  
4.145  
4.137  
4.018  
3.990  
3.976  
3.946  
3.929  
3.890  
3.825  
3.812  
3.792  
3.778  
3.766  
3.751  
3.727  
3.704 lyx-197

NAME lyx-2016  
EXPNO 50  
PROCNO 1

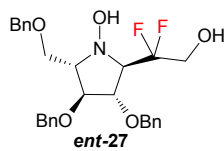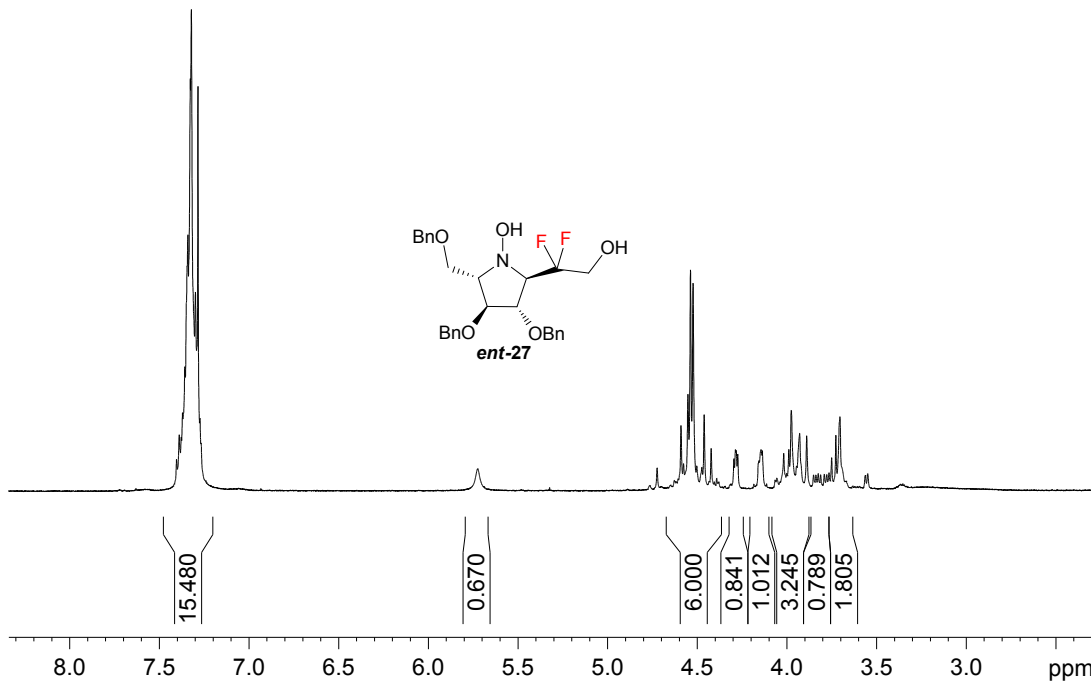

137.838  
137.417  
137.378  
128.449  
128.041  
127.911  
127.800  
127.753

82.606  
82.135  
77.451  
77.028  
76.605  
74.376  
74.051  
73.663  
73.357  
71.948  
71.820  
68.627  
65.764  
63.808  
63.386  
62.963

lyx-197-C13  
NAME lyx-2016  
EXPNO 51  
PROCNO 1

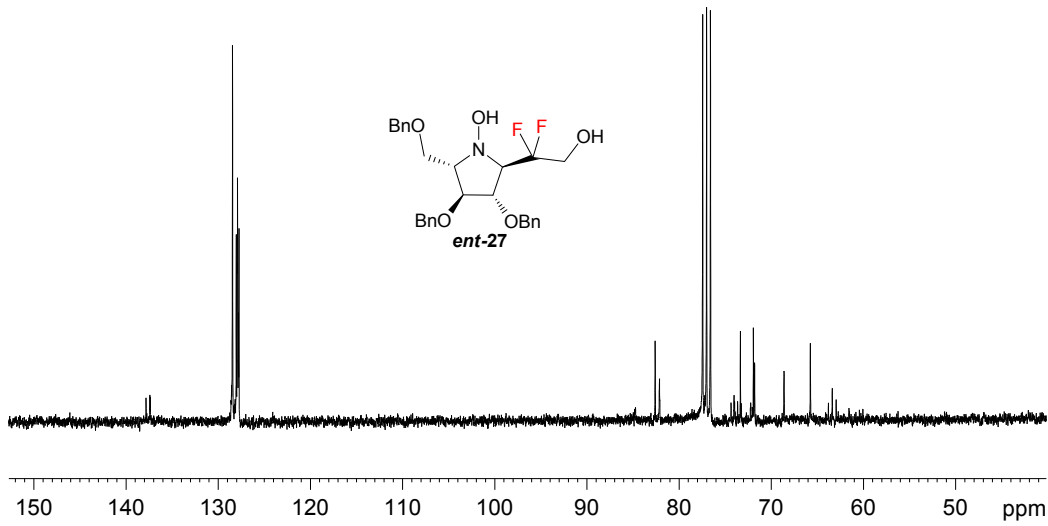

Compound *ent-10*:

4.794  
4.265  
4.240  
4.216  
3.940  
3.914  
3.892  
3.861  
3.843  
3.778  
3.767  
3.724  
3.706  
3.680  
3.665  
3.539  
3.515  
3.492  
3.468  
3.447  
3.423  
2.997  
2.983  
2.968

lyx-169

NAME lyx-2016  
EXPNO 41  
PROCNO 1

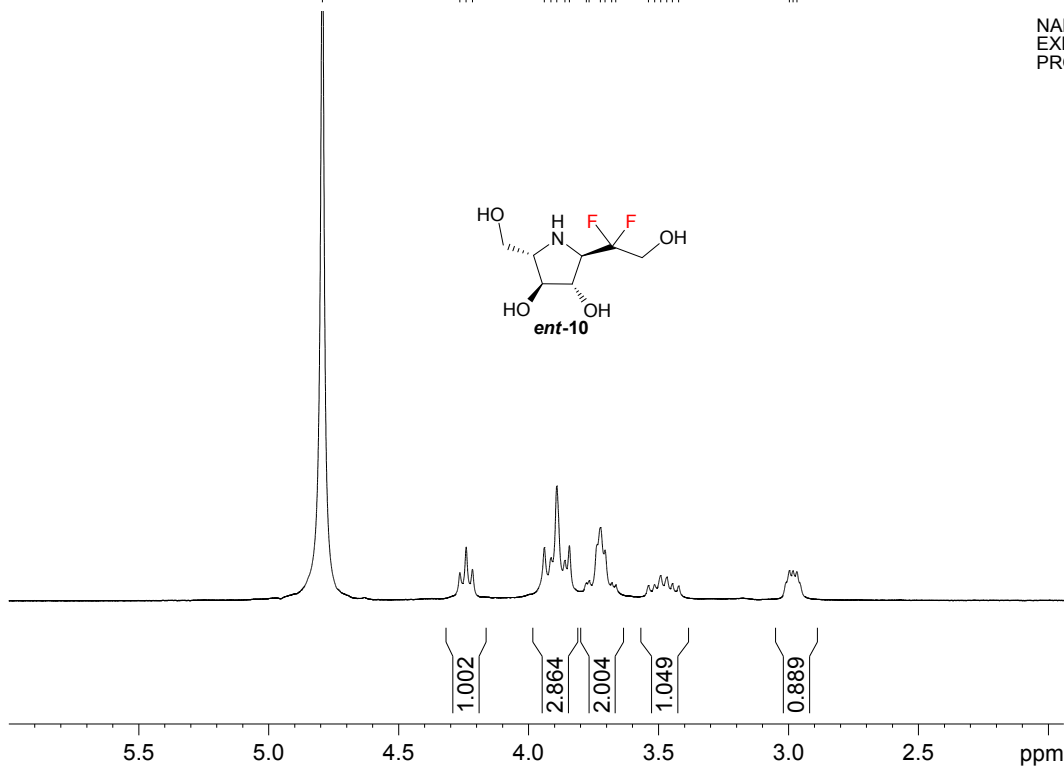

125.473  
122.234  
118.993

76.833  
76.203  
61.670  
61.375  
60.998  
60.633  
60.336  
60.108

lyx-169-C13  
NAME lyx-2016  
EXPNO 43  
PROCNO 1

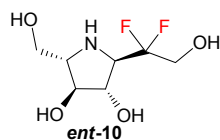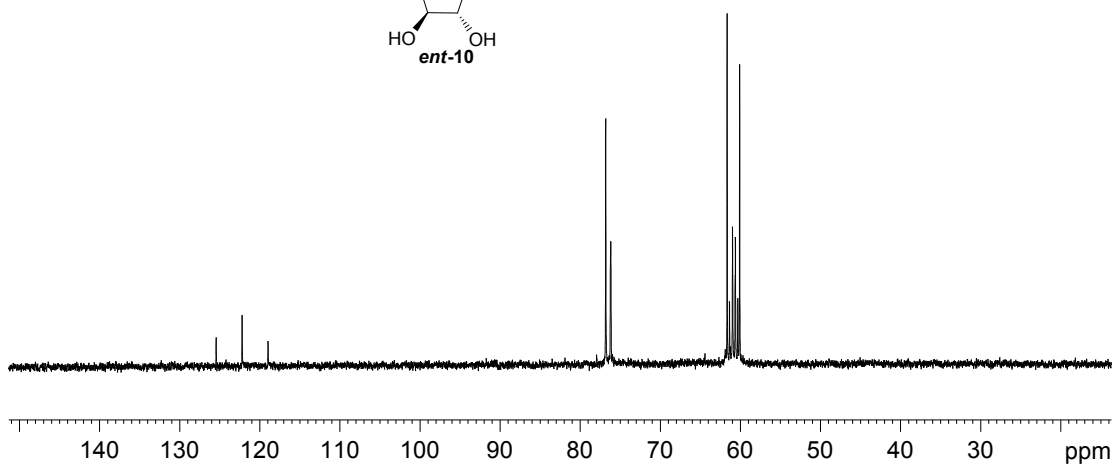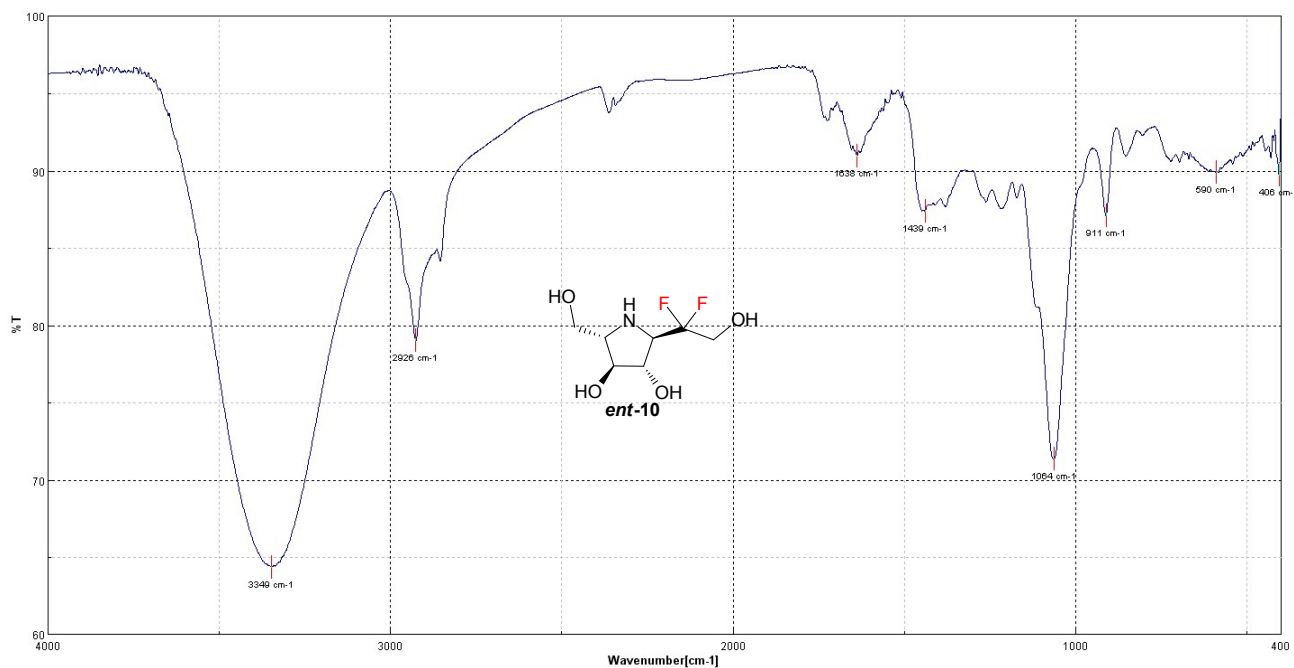

-117.471  
 -118.134  
 -119.413  
 -119.445  
 -120.079  
 -120.112

NAME  
 EXPNO 19F  
 PROCNO 30128  
 1

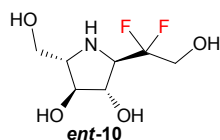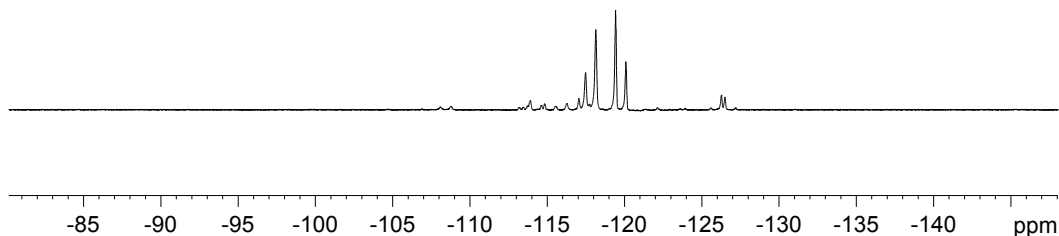

**Compound 29a:**

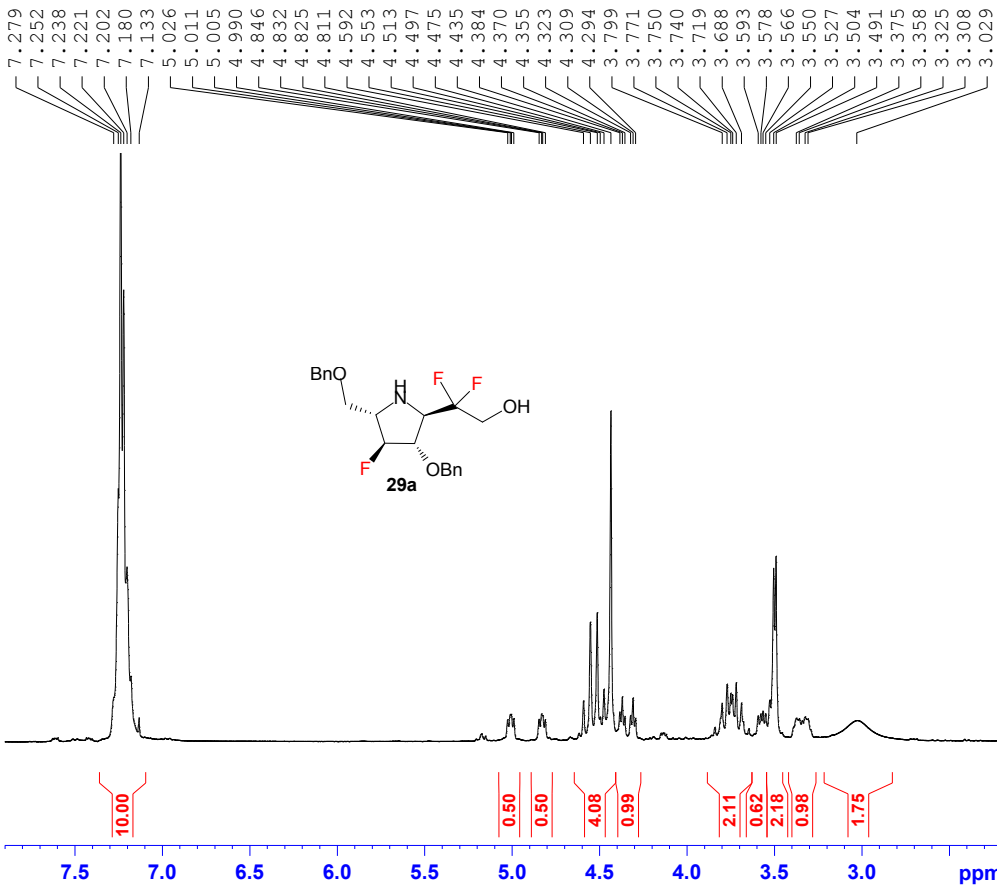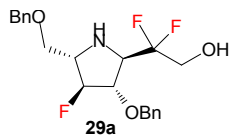

NAME lyx4-157b  
 EXPNO 20  
 PROCNO 1  
 Date\_ 20100522  
 Time\_ 14.46  
 INSTRUM spect  
 PROBHD 5 mm DUL 13C-1  
 PULPROG zg30  
 TD 65536  
 SOLVENT CDCl3  
 NS 2  
 DS 0  
 SWH 8992.806 Hz  
 FIDRES 0.137219 Hz  
 AQ 3.6438515 sec  
 RG 45.3  
 DW 55.600 usec  
 DE 8.00 usec  
 TE 299.9 K  
 D1 1.00000000 sec  
 TD0 1

===== CHANNEL f1 =====  
 NUC1 1H  
 P1 10.80 usec  
 PL1 3.00 dB  
 SF01 300.1324010 MHz  
 SI 32768  
 SF 300.1300436 MHz  
 WDW EM  
 SSB 0  
 LB 0.30 Hz  
 GB 0  
 PC 1.00

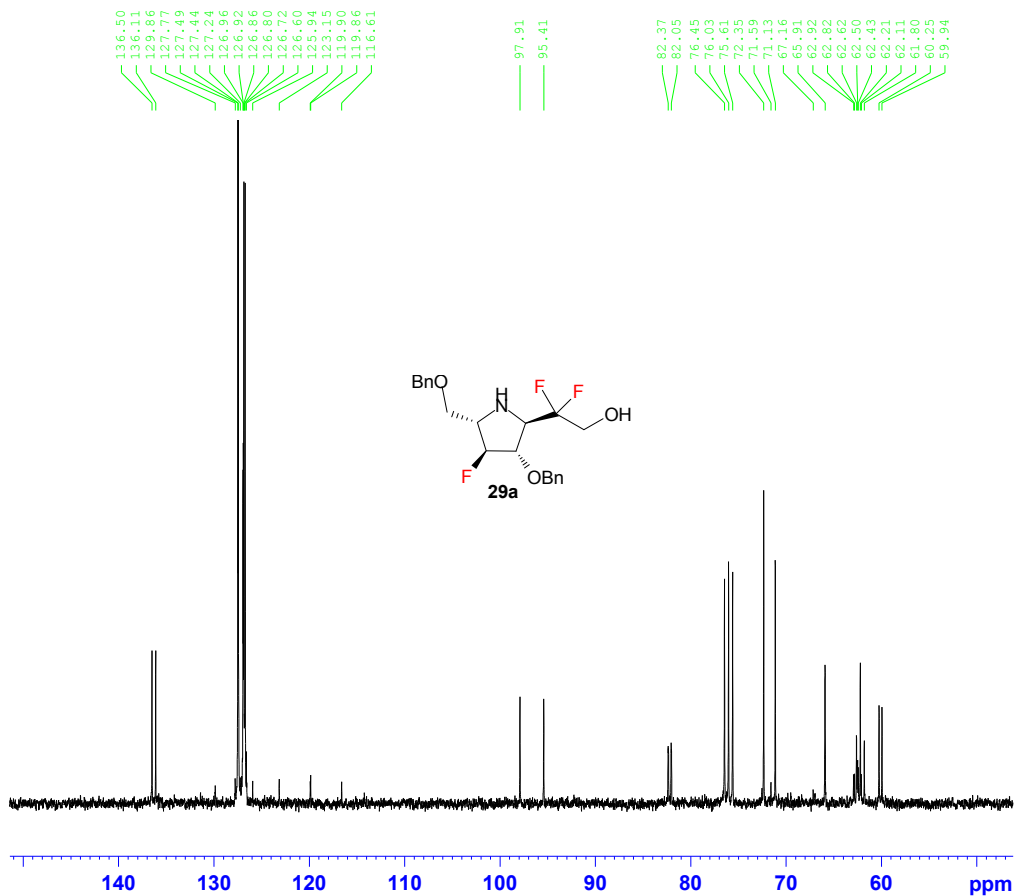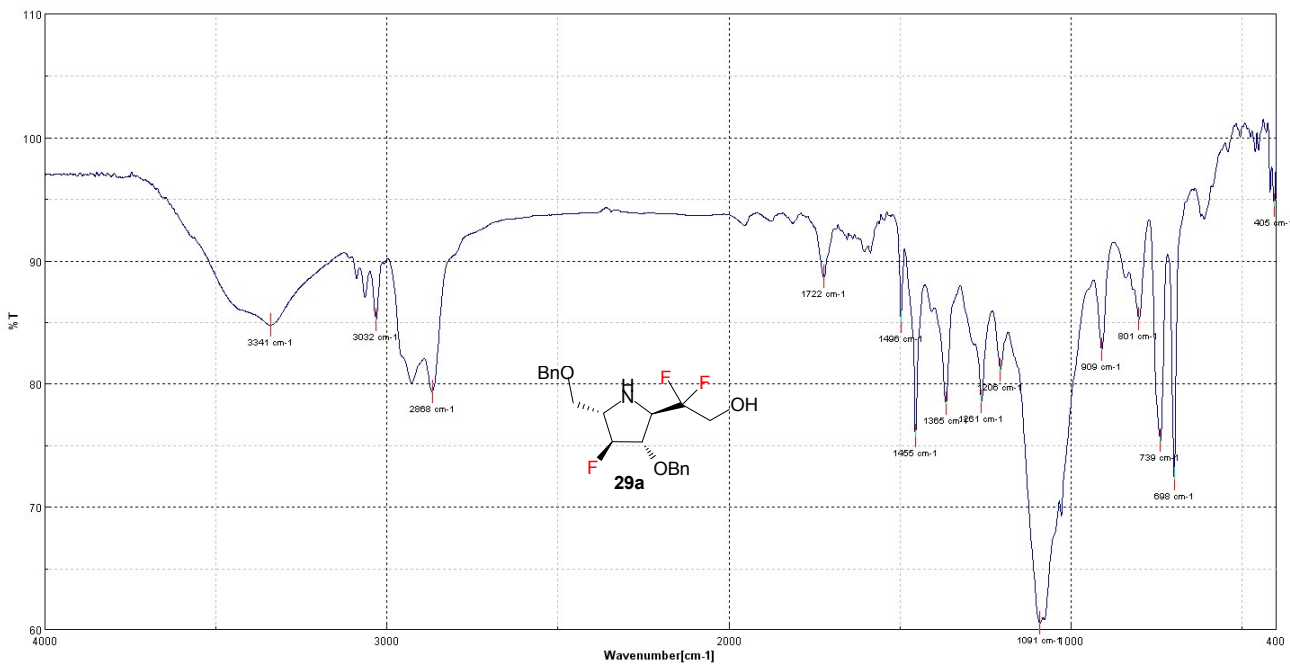



**Compound 29b:**

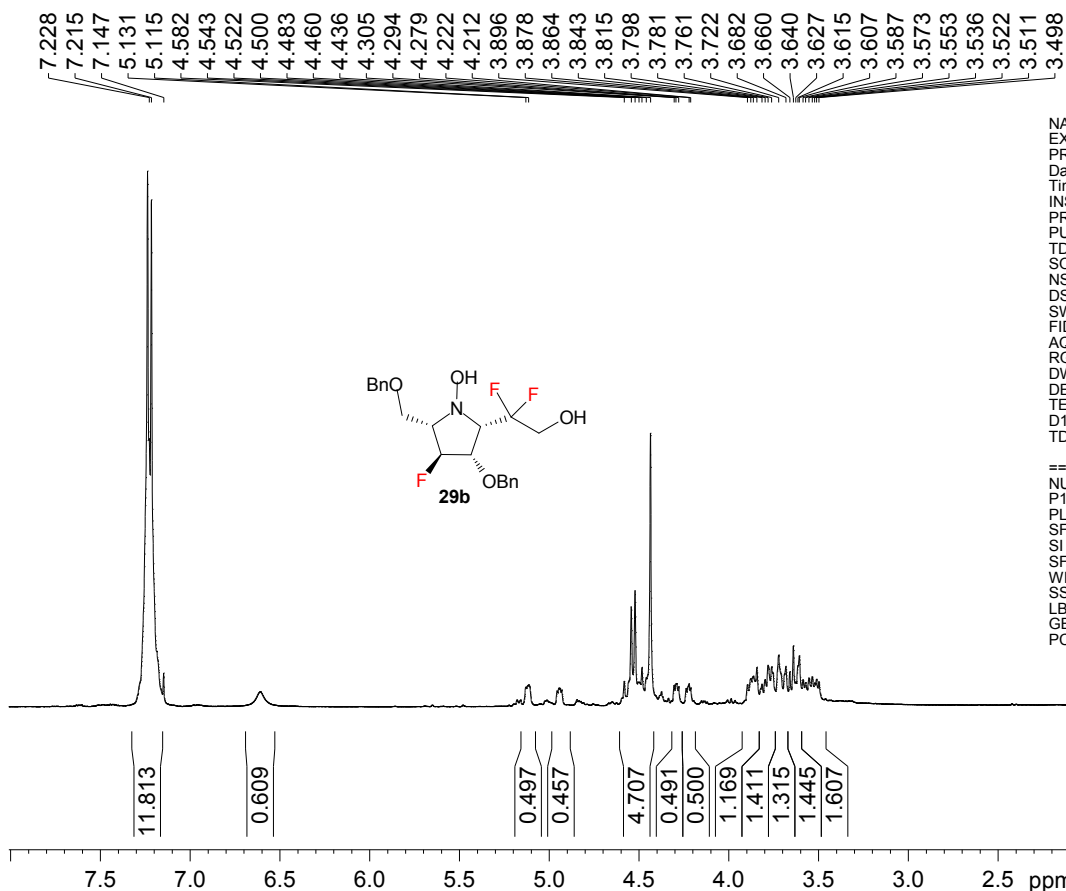

NAME lyx4-157c  
EXPNO 10  
PROCNO 1  
Date\_ 20100522  
Time 15.26  
INSTRUM spect  
PROBHD 5 mm DUL 13C-1  
PULPROG zg30  
TD 65536  
SOLVENT CDCl3  
NS 3  
DS 0  
SWH 8992.806 Hz  
FIDRES 0.137219 Hz  
AQ 3.6438515 sec  
RG 71.8  
DW 55.600 usec  
DE 8.00 usec  
TE 300.2 K  
D1 1.00000000 sec  
TD0 1

===== CHANNEL f1 =====  
NUC1 1H  
P1 10.80 usec  
PL1 3.00 dB  
SFO1 300.1324010 MHz  
SI 32768  
SF 300.1300395 MHz  
WDW EM  
SSB 0  
LB 0.30 Hz  
GB 0  
PC 1.00

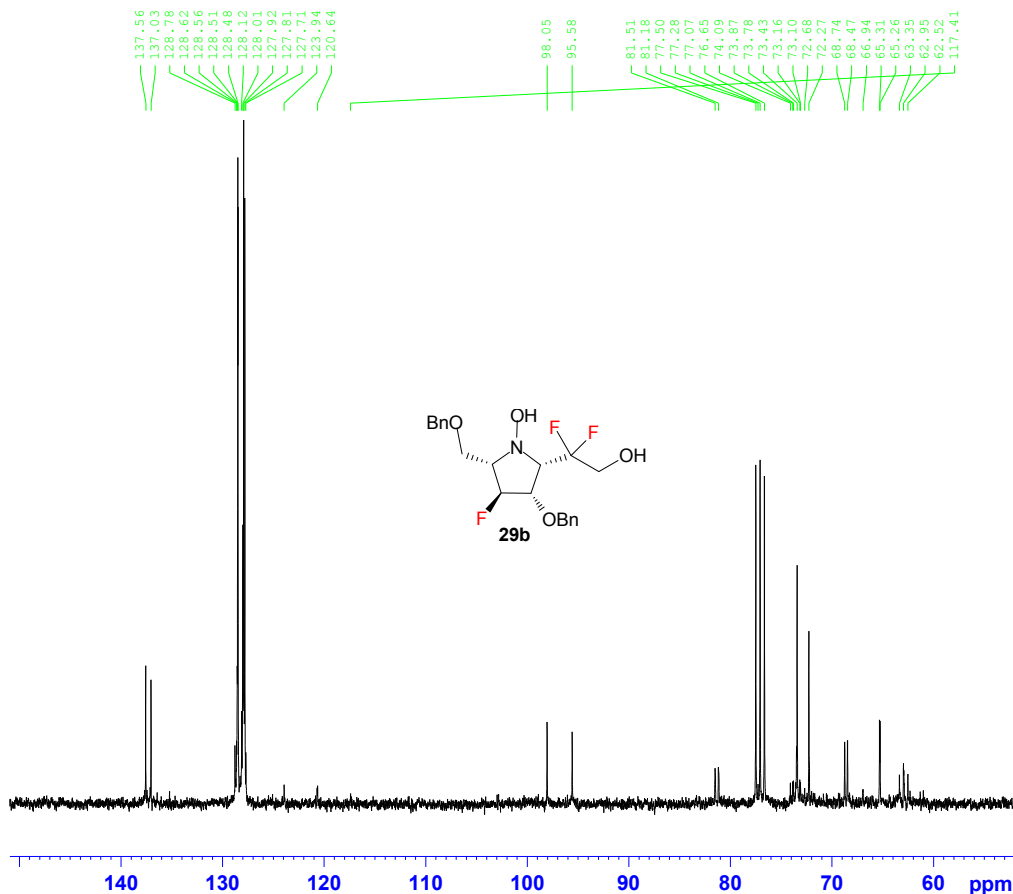

NAME lyx4-157c  
EXPNO 12  
PROCNO 1  
Date\_ 20100522  
Time 15.32  
INSTRUM spect  
PROBHD 5 mm DUL 13C-1  
PULPROG zgpg30  
TD 65536  
SOLVENT CDCl3  
NS 251  
DS 4  
SWH 17985.611 Hz  
FIDRES 0.274439 Hz  
AQ 1.8219508 sec  
RG 4597.6  
DW 27.800 usec  
DE 8.00 usec  
TE 300.3 K  
D1 2.00000000 sec  
D11 0.03000000 sec  
TD0 1

===== CHANNEL f1 =====  
NUC1 13C  
P1 12.50 usec  
PL1 2.00 dB  
SFO1 75.4752953 MHz

===== CHANNEL f2 =====  
CPDPRG2 waltz16  
NUC2 1H  
PCPD2 100.00 usec  
PL2 3.00 dB  
PL12 22.33 dB  
PL13 23.00 dB  
SFO2 300.1312005 MHz  
SI 32768  
SF 75.4677490 MHz  
WDW EM  
SSB 0  
LB 1.00 Hz  
GB 0  
PC 1.40

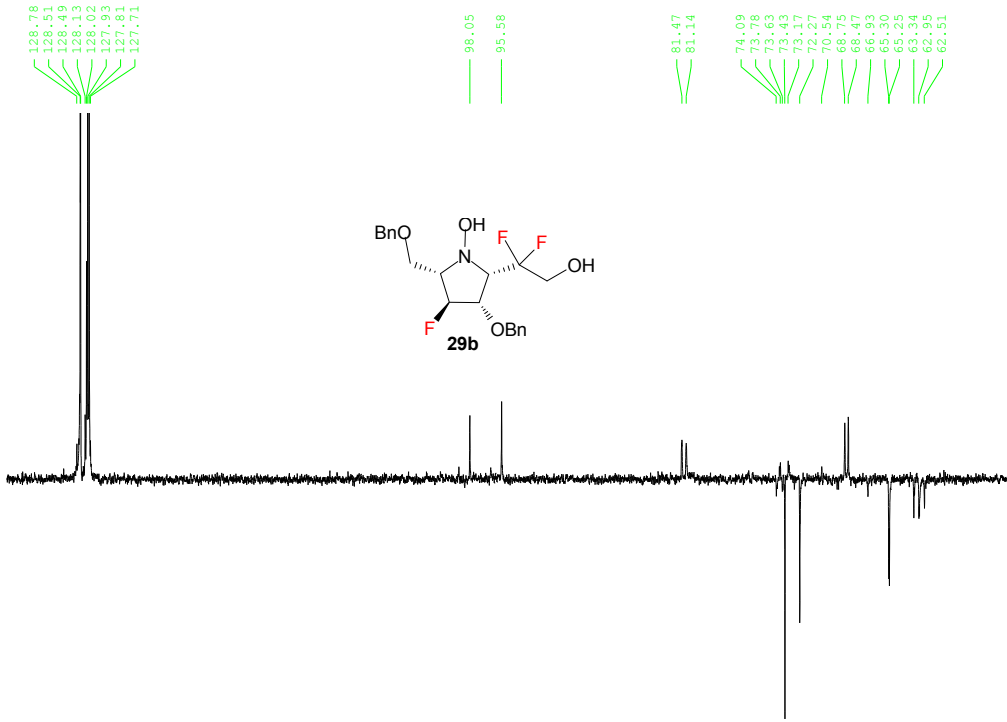

```

NAME          lyx4-157c
EXPNO         13
PROCNO        1
Date_         20100522
Time          15.51
INSTRUM       spect
PROBHD        5 mm DUL 13C-1
PULPROG       dept135
TD            65536
SOLVENT       CDCl3
NS            173
DS            4
SWH           17985.611 Hz
FIDRES        0.274439 Hz
AQ            1.8219508 sec
RG            16384
DW            27.800 usec
DE            8.00 usec
TE            300.7 K
CNST2         145.0000000
D1            2.0000000 sec
D2            0.00344828 sec
D12           0.00002000 sec
TD0           1

===== CHANNEL f1 =====
NUC1          13C
P1            12.50 usec
P2            25.00 usec
PL1           2.00 dB
SFO1          75.4752953 MHz

===== CHANNEL f2 =====
CPDPRG2       waltz16
NUC2          1H
P3            10.80 usec
P4            21.60 usec
PCPD2         100.00 usec
PL2           3.00 dB
PL12          22.33 dB
SFO2          300.1312005 MHz
SI            32768
SF            75.4677490 MHz
WDW           EM
SSB           0
LB            1.00 Hz
GB            0
PC            1.40
  
```

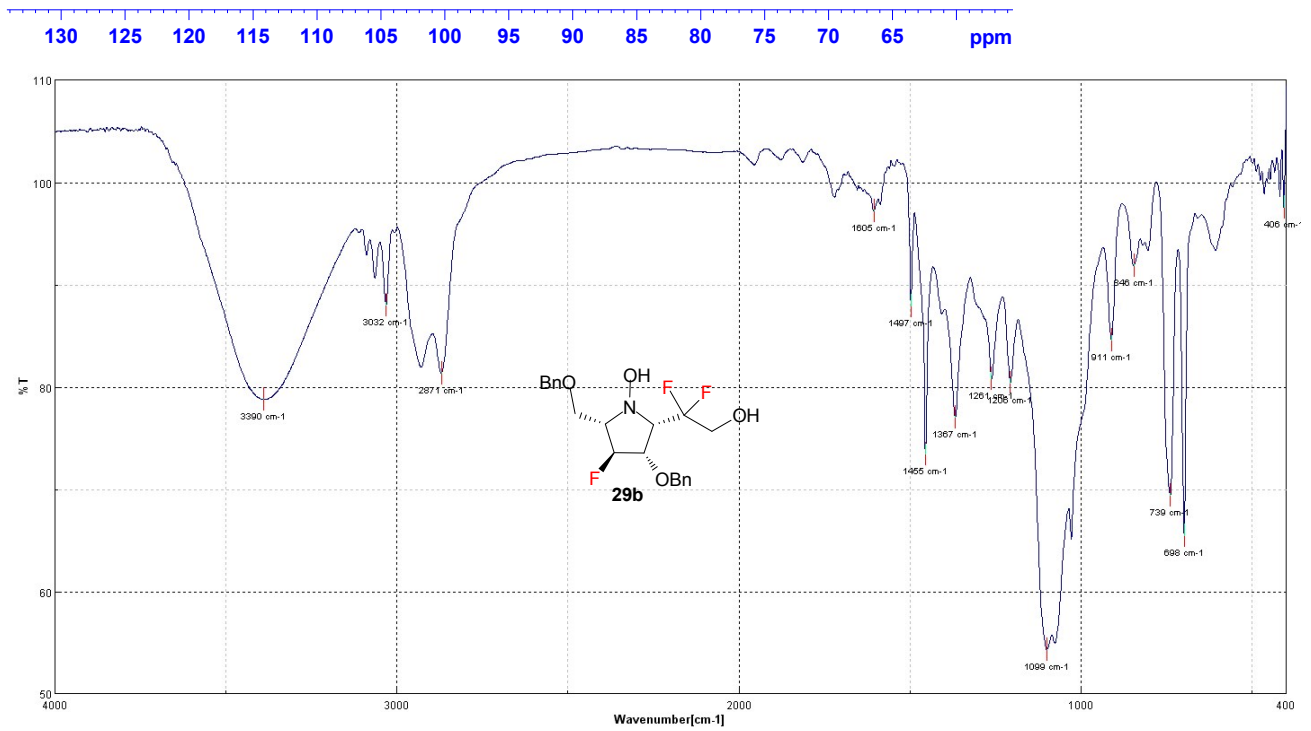

**Compound 11:**

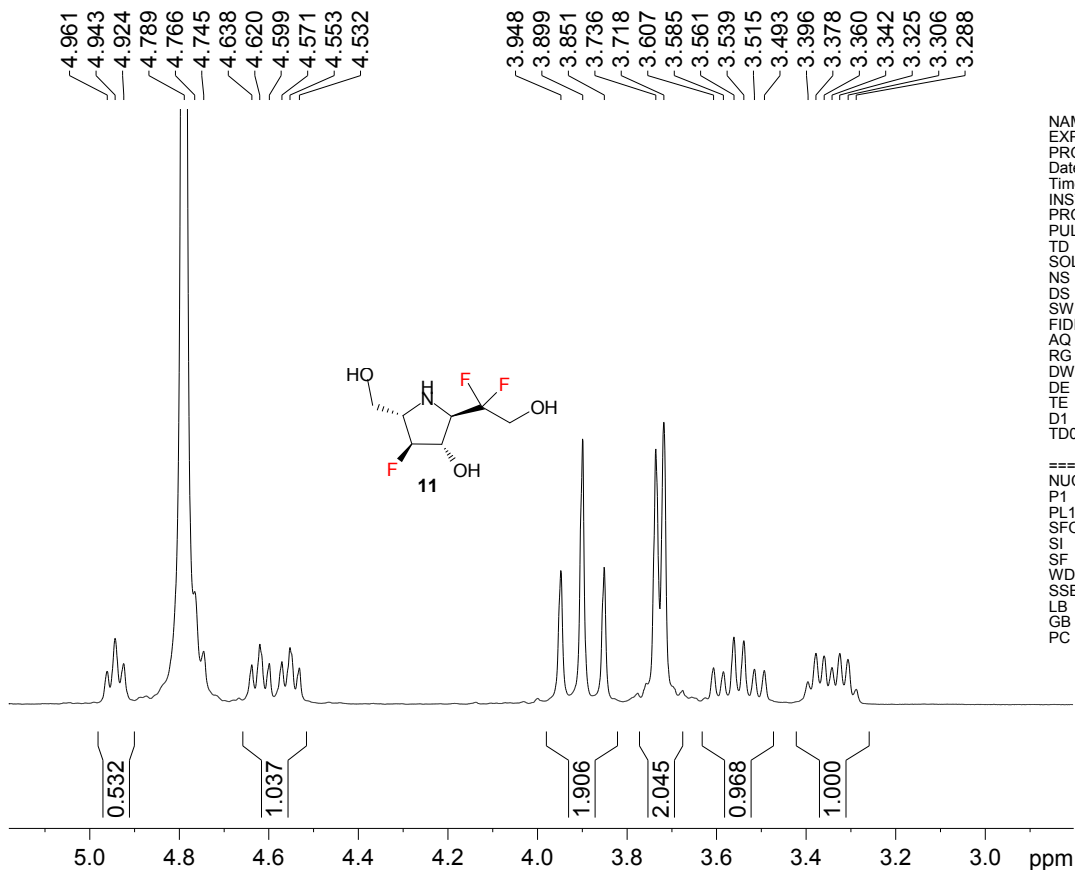

```

NAME lyx4-159a
EXPNO 10
PROCNO 1
Date_ 20100602
Time 9.05
INSTRUM spect
PROBHD 5 mm DUL 13C-1
PULPROG zg30
TD 65536
SOLVENT D2O
NS 3
DS 0
SWH 8992.806 Hz
FIDRES 0.137219 Hz
AQ 3.6438515 sec
RG 128
DW 55.600 usec
DE 8.00 usec
TE 298.6 K
D1 1.00000000 sec
TD0 1
    
```

```

===== CHANNEL f1 =====
NUC1 1H
P1 10.80 usec
PL1 3.00 dB
SFO1 300.1324010 MHz
SI 32768
SF 300.1299717 MHz
WDW EM
SSB 0
LB 0.30 Hz
GB 0
PC 1.00
    
```

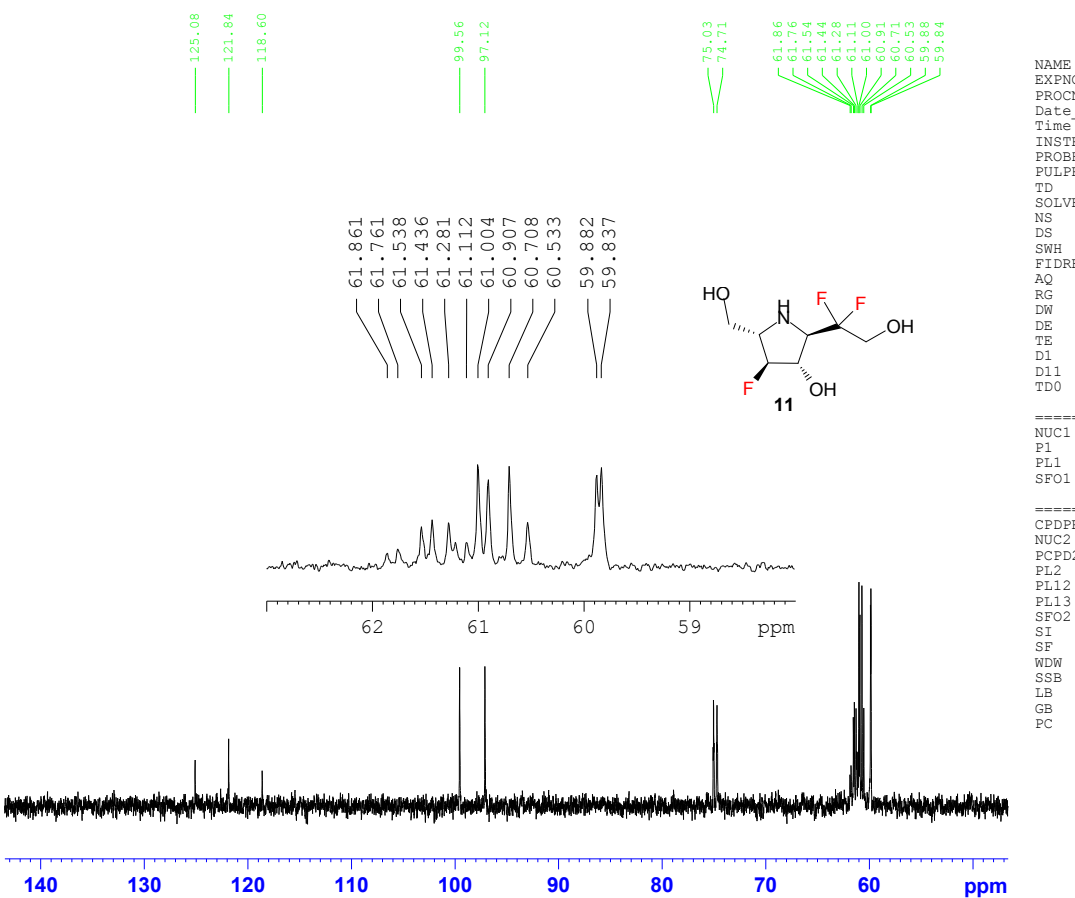

```

NAME lyx4-159a
EXPNO 12
PROCNO 1
Date_ 20100602
Time 9.12
INSTRUM spect
PROBHD 5 mm DUL 13C-1
PULPROG zgpg30
TD 65536
SOLVENT D2O
NS 203
DS 4
SWH 17985.611 Hz
FIDRES 0.274439 Hz
AQ 1.8219508 sec
RG 14596.5
DW 27.800 usec
DE 8.00 usec
TE 298.9 K
D1 2.00000000 sec
D11 0.03000000 sec
TD0 1
    
```

```

===== CHANNEL f1 =====
NUC1 13C
P1 12.50 usec
PL1 2.00 dB
SFO1 75.4752953 MHz
    
```

```

===== CHANNEL f2 =====
CPDPRG2 waltz16
NUC2 1H
PCPD2 100.00 usec
PL2 3.00 dB
PL12 22.33 dB
PL13 23.00 dB
SFO2 300.1312005 MHz
SI 32768
SF 75.4677490 MHz
WDW EM
SSB 0
LB 1.00 Hz
GB 0
PC 1.40
    
```

99.55 97.10 75.03 74.70 61.85 61.84 61.83 61.82 61.81 61.80 61.20 61.10 60.99 60.90 60.70 60.53 59.87 59.83

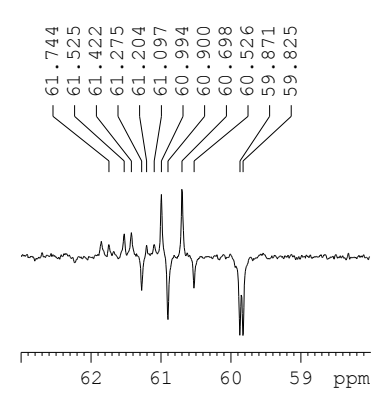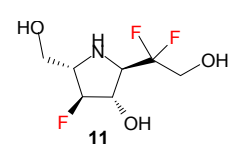

```

NAME lyx4-159a
EXPNO 13
PROCNO 1
Date_ 20100602
Time 9.25
INSTRUM spect
PROBHD 5 mm DUL 13C-1
PULPROG dept135
TD 65536
SOLVENT D2O
NS 75
DS 4
SWH 17985.611 Hz
FIDRES 0.274439 Hz
AQ 1.8219508 sec
RG 16384
DW 27.800 usec
DE 8.00 usec
TE 299.2 K
CNST2 145.000000
D1 2.00000000 sec
D2 0.00344828 sec
D12 0.00002000 sec
TD0 1

===== CHANNEL f1 =====
NUC1 13C
P1 12.50 usec
P2 25.00 usec
PL1 2.00 dB
SFO1 75.4752953 MHz

===== CHANNEL f2 =====
CPDPRG2 waltz16
NUC2 1H
P3 10.80 usec
P4 21.60 usec
PCPD2 100.00 usec
PL2 3.00 dB
PL12 22.33 dB
SFO2 300.1312005 MHz
SI 32768
SF 75.4677490 MHz
WDW EM
SSB 0
LB 1.00 Hz
GB 0
PC 1.40
  
```

105 100 95 90 85 80 75 70 65 60 ppm

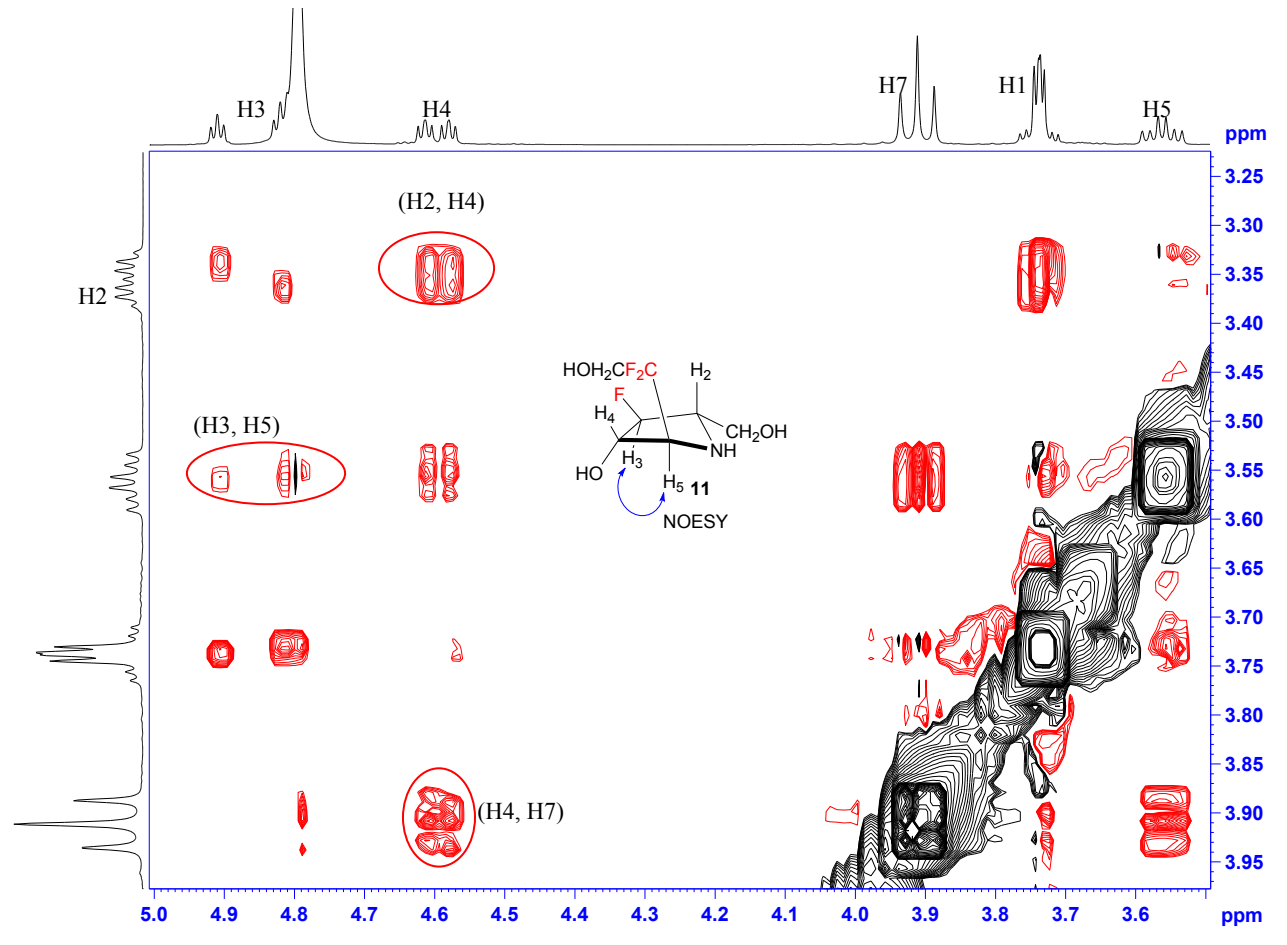

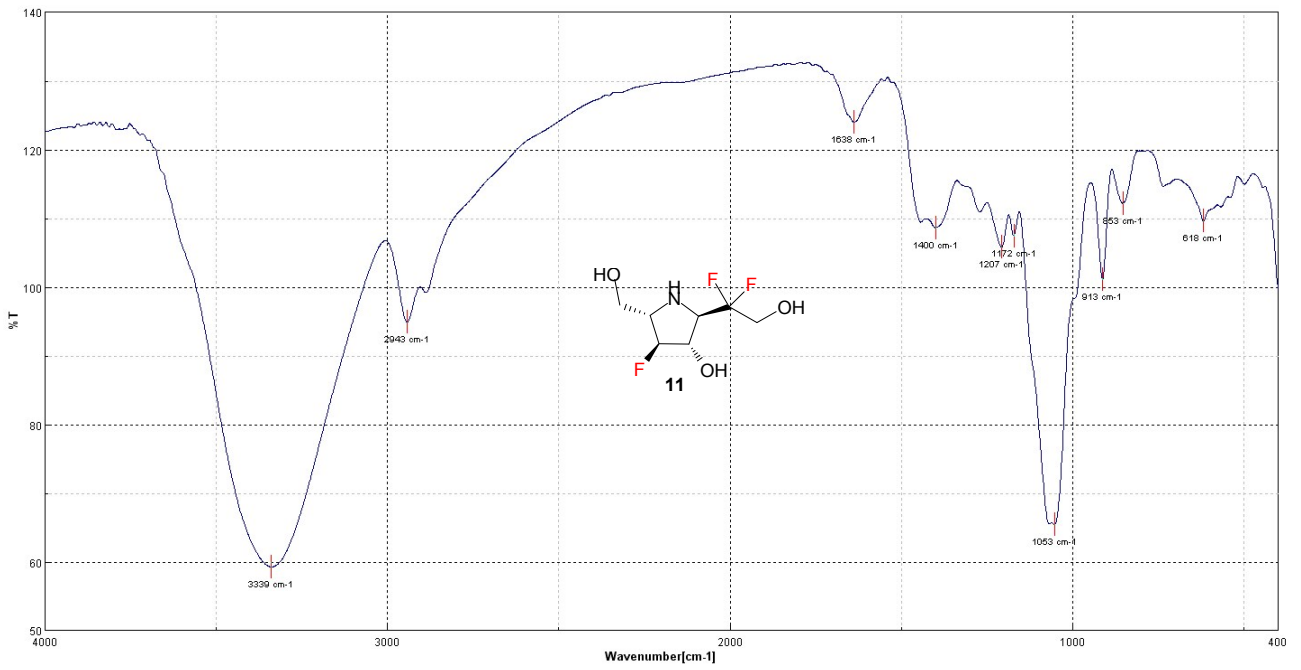

-118.655  
-118.688  
-118.721

-192.544  
-192.588  
-192.638  
-192.685  
-192.730  
-192.778

NAME 19F  
EXPNO 14  
PROCNO 1

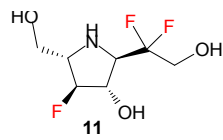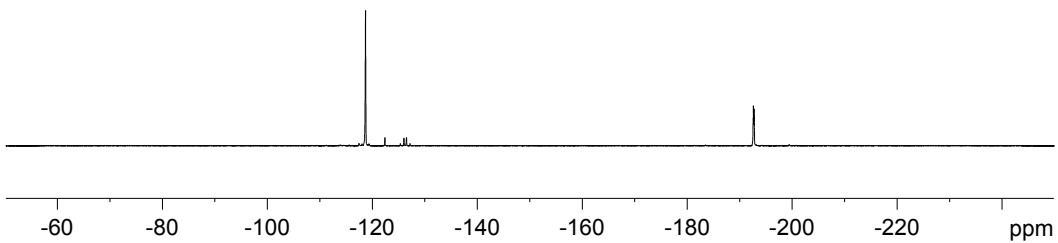

Supplement: c5ob02474a1.pdf [file c5ob02474a1.pdf]
